## **A Systematic Review and Meta-Analysis: Research Using the Autism Polygenic Score**

M.M. de Wit, M.J. Morgan, I. Libedinsky, C. Austerberry, S. Begeer, A. Abdellaoui, A. Ronald\* and T.J.C. Polderman\*

\*Joint senior authors

### **Affiliations:**

Melanie M. de Wit: Department of Clinical, Neuro and Developmental Psychology, Vrije Universiteit Amsterdam, Amsterdam Public Health Research Institute, Amsterdam, the Netherlands.

Morgan J. Morgan: Department of Psychology, Faculty of Health and Medical Sciences, University of Surrey, Guildford, United Kingdom

Ilan Libedinsky: Department of Complex Trait Genetics, Center for Neurogenomics and Cognitive Research, Amsterdam Neuroscience, Vrije Universiteit Amsterdam, Amsterdam, the Netherlands.

Chloe Austerberry: Centre for Family Research, Department of Psychology, University of Cambridge, Cambridge, United Kingdom

Sander Begeer: Department of Clinical, Neuro and Developmental Psychology, Vrije Universiteit Amsterdam and Amsterdam Public Health Research Institute, Amsterdam, the Netherlands.

Abdel Abdellaoui: Department of Psychiatry, Amsterdam UMC, University of Amsterdam, Amsterdam, The Netherlands

Angelica Ronald: Department of Psychology, Faculty of Health and Medical Sciences, University of Surrey, Guildford, United Kingdom

Tinca J.C. Polderman: Department of Clinical, Neuro and Developmental Psychology, Vrije Universiteit Amsterdam, Amsterdam, the Netherlands. Department of Child and Adolescent Psychiatry and Psychosocial Care, Amsterdam UMC, Vrije Universiteit Amsterdam, Amsterdam, The Netherlands, Amsterdam Public Health Research Institute, Amsterdam, the Netherlands.

### **Acknowledgements**

We thank our EGAL (Environmental and Genetic Influences on Autism across the Lifespan) panel for their valuable input.

**NOTE:** This preprint reports new research that has not been certified by peer review and should not be used to guide clinical practice.

## Financial support

This work was supported by ZonMw (TP, SB and MdW: grant number 60-63600-98-834)

## Disclosures

Authors declare they have nothing to disclose.

## Abstract

**Objective:** Genetic factors play a substantial role in the etiology of autism and its co-occurrence with other conditions and traits. The autism polygenic score, derived from the latest autism case-control meta-genome-wide association studies, captures some of the accumulated influence of common genetic variants on autism. We reviewed and meta-analyzed published studies that assessed the relationship between this autism polygenic score and autism diagnosis, and autistic, behavioral and neurobiological traits. **Method:** Systematically searching public databases, we identified 72 studies and > 750 outcome measures. Included studies received a quality assessment. **Results:** The majority of included studies were rated as good quality. The autism polygenic score was most strongly associated with autism diagnosis (meta-analytic  $r = .162$ , 95% CI .066 – .258). The autism polygenic score was also significantly associated with autistic traits but to a lesser degree than for autism (meta-analytic  $r = .042$  (95% CI .004 – .081). Associations with other outcomes were inconsistent and meta-analytic effect sizes were generally small (median  $r = .03$ ). **Conclusion:** We conclude that the current autism polygenic score is consistently associated with autism diagnostic status and autistic traits, but overlap between autism and other traits and conditions is not, from publications to date, explained significantly by the autism polygenic score. When compared to other mental conditions, autism is phenotypically and etiologically heterogeneous, which might drive the relatively modest associations observed with the autism polygenic score to date.

## Introduction

Autism Spectrum Disorder (ASD; from here on autism as per Bottema-Beutel<sup>1</sup>) is a complex neurodevelopmental condition that is characterized by atypical social interaction and communication, repetitive behavior and focused interests, and sensory sensitivities. The prevalence of autism is estimated at 1-2% of the population worldwide<sup>2</sup>. Genetic factors substantially contribute to autism's etiology. For example, a meta-analysis of twin and family studies indicated that autism is approximately 64 – 91% heritable<sup>3</sup>.

Autism shows considerable co-occurrence with developmental, psychiatric and somatic conditions and a range of other traits. The incidence of other psychiatric diagnoses in autistic individuals is estimated around 70%<sup>4</sup>. Autistic individuals<sup>1</sup> also have increased liability for a range of physical conditions<sup>7</sup>. Shared genetic influences between autism, autistic traits and neurodevelopmental, psychiatric and physical conditions may explain part of this phenotypic co-occurrence<sup>8,9</sup>.

Genome-wide association studies (GWASs) assess the relationship between a large number of common genetic variants spread across the human genome and phenotypic outcomes of interest. The latest autism meta-GWAS by Grove et al. (2019)<sup>10</sup> identified 5 independent common genetic loci that were significantly associated with autism and revealed a single nucleotide polymorphism (SNP)-based heritability, which reflects the proportion of phenotypic variance that is explained by additive effects of genomic variants included in the GWAS, of 11.8%. However, many common genetic loci beyond those that are genome-wide significant are involved in autism's etiology<sup>10</sup>.

Polygenic scores use the summary statistics from GWAS to capture part of the combined influence of common genetic influences on an outcome. They reflect the effect of

---

<sup>1</sup> \*We use a combination of identity-first and person-first language to accommodate to everyone's preferences<sup>5,6</sup>.

multiple genetic variants with small individual effects in a single value. They are calculated by summing together an individual's common genetic variants, weighted by their effect size. Polygenic scores are one of the tools that can be employed to increase understanding of the genetic basis of complex traits such as autism, and overlap with other traits<sup>11</sup>, amongst many other popular methods in molecular genetic studies<sup>12</sup>. In addition to their scientific value, polygenic scores have potential clinical value in the future in addition to existing diagnostic tools<sup>13</sup>. However, at present, most psychiatric polygenic scores are not accurate for individuals, and bioethical issues relating to the application of polygenic scores need to be carefully planned<sup>13</sup>.

Although psychiatric phenotypes have long been among the most studied in genetics<sup>14</sup>, only few studies systematically studied reported polygenic score associations for a specific neuropsychiatric classification with related traits and conditions<sup>15-18</sup>. These studies report consistent associations between the ADHD polygenic score and ADHD diagnosis (OR range 1.22% to 1.76%), as well as other traits and diagnoses<sup>15,16,18</sup> and between the schizophrenia polygenic score and other traits and disorders<sup>17</sup>.

The latest autism GWAS led to a wealth of studies assessing the relationship between the autism polygenic score and autism diagnosis, autistic traits, and a wide variety of other related traits. Here, we systematically reviewed and meta-analyzed all published studies that assessed the relationship between the autism polygenic scores and all available outcome measures, in order to understand whether the current autism polygenic score can explain phenotypic and genetic overlap between autism and co-occurring conditions and traits.

## Methods

This study was pre-registered with PROSPERO Framework under reference number CRD42022307993. Primary analyses were carried out according to the preregistration. We performed additional analyses, of which details are described under ‘secondary analyses’.

## **Study Selection**

We aimed to include all studies assessing the relationship between the autism polygenic score based on the most recent GWAS results<sup>10</sup> and autism diagnostic status, autistic traits, and behavioral and neurobiological traits. A first systematic search of PubMed, Web of Science, Psychinfo and Scopus for published, peer-reviewed studies in the English language was performed on November 2, 2022 and a second search on January 6, 2023. The search terms per search engine are given in sTable 2, available online. Studies were excluded if: 1) The predictor was not an autism polygenic score based on the latest autism GWAS<sup>10</sup>; 2) The polygenic score was not based on genome-wide results, but included only a selection of SNPs; 3) The study was a review; 4) No direct associations between the autism polygenic score and an outcome variable were reported (e.g., polygenic transmission tests (pTDT), interaction effects, genetic correlations, multivariate associations). Abstracts were inspected by MdW. A second reviewer (TP) was involved in case of any doubt regarding inclusion. Figure 1 shows the full selection procedure.

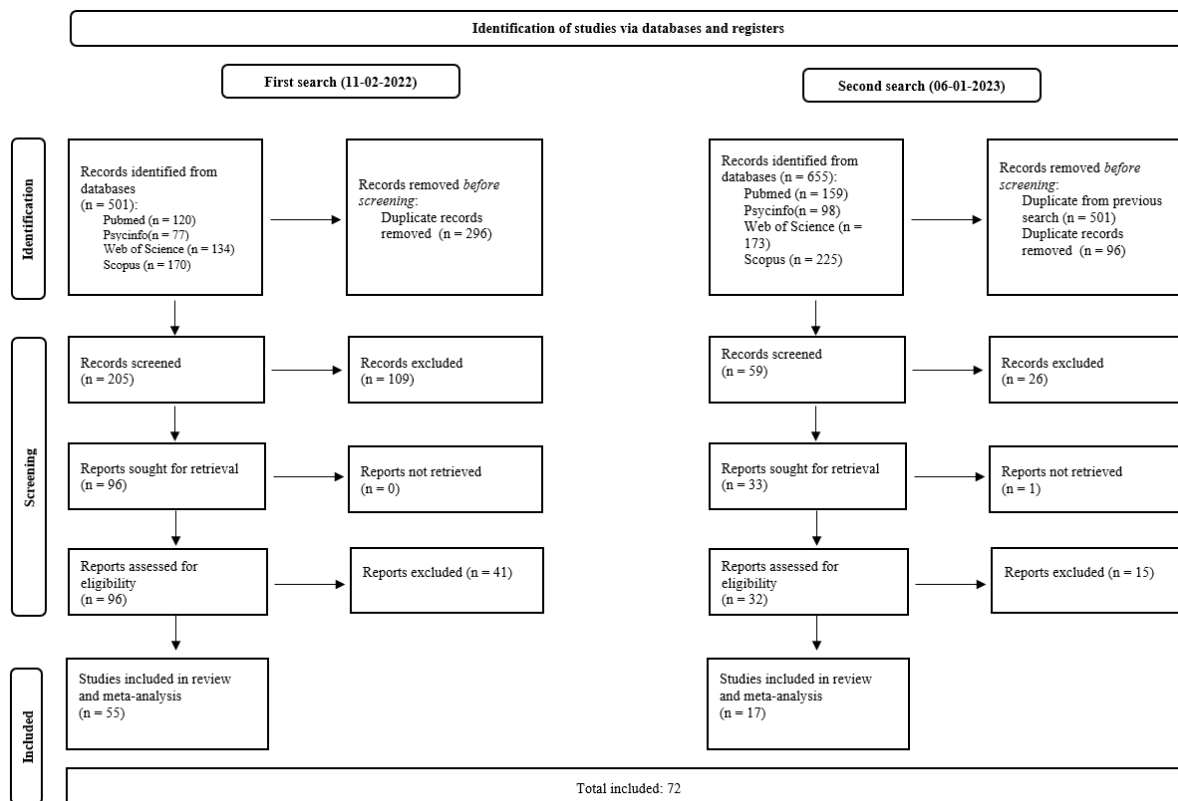

Figure 1. PRISMA Flow Diagram

## Quality assessment

To evaluate the quality, validity and generalizability of our included studies, we reviewed each study against a set of quality assessment criteria based on Hayden et al. (2006, 2013)<sup>19,20</sup>. Criteria were largely similar to Ronald et al. (2019), with one addition in the control of confounders domain, where we stated that the polygenic score p-value threshold should be reported. Detailed descriptions of the quality assessment criteria are provided in the Supplementary Methods. All criteria were rated by reviewers MdW and MM. Since these raters had insufficient specialism in brain-related measures, these specific outcomes were reviewed by an expert (IL). In case of any inconsistencies, criteria were assessed by a third rater (TP). A quality assessment domain was considered to contain a bias if > 50% of the criteria in that domain were scored negatively.

## **Systematic review and meta-analyses**

*Data extraction.* Results were extracted by authors MdW, and for brain measures by IL.

Effect sizes that were not provided in the included papers were requested from corresponding authors via email. If authors did not respond to our request but effect sizes were displayed in Figures, we extracted the results using an online tool (<https://automeris.io/WebPlotDigitizer/>). All reported effect sizes were transformed to correlation coefficients.

If studies reported results for polygenic scores based on multiple GWAS p-value thresholds, we selected the threshold with the strongest association. Where studies reported multiple models, we selected the effect sizes from models that included covariates that most closely resembled those in other included papers and the requirements for the quality assessment (sex, age, socio-economic status (SES)).

*Primary analyses.* First, all included studies were systematically reviewed with the significance of individual effect sizes based on how they were reported in the respective studies.

Second, for the meta-analysis, all the extracted effect sizes were transformed into correlation coefficients. Since several studies assessed multiple effect sizes, and samples overlapped between studies, we applied three-level random effects meta-analyses per outcome category using the R package Metafor<sup>21</sup>. These models account for dependency between effect sizes by incorporating three variance components; sampling variance of extracted effect sizes (level 1), within-sample variance in effect sizes (level 2) and between sample variance (level 3)<sup>22</sup>. We tested for overall significant heterogeneity, and heterogeneity within and between studies using the  $I^2$  statistic<sup>23</sup>. We assessed potential publication bias using funnel plots, and by performing and Rosenthal's Fail Safe N test<sup>24</sup>.

*Secondary analyses.* In our systematic review, we additionally describe sex differences. We further performed a series of secondary meta-analyses: 1) differences in the association between the autism polygenic score and autism diagnosis for specific populations (Europe-based versus US-based), and 2) subgroup analyses for the associations between the autism polygenic score and ADHD, psychotic spectrum, eating disorders and self-harm and suicide ideation (in specific psychiatric classifications category).

## Results

### Study characteristics

Studies showed relatively large sample overlap: A total of 57 different samples were used across the 72 studies (pooled N = 720,087). The average percentage of males in the included study samples was 48.3% (<sup>25-31</sup>) omitted from this percentage due to missing or unclear sex information). Of the included studies 47.2% were performed on child or adolescent (<18 years) participants, 19.4% on adult (> 18 years) participants, 29.2% on a mixed sample of children and adults, and for 2,8% the sample age information was unavailable or unclear. Studies were most often based on participants living in Europe (63.8%), followed by Northern America (25.8%), Asia (5.6%), and Australia (1.4%). The remaining studies (6.9%) were based on participants from multiple continents. Genetic ancestry was mostly European (86.1%), with a limited number of papers including East Asian (5.6%) or trans-ancestry sample analyses (9.7%). Results can be considered to be based on participants of European ancestry, unless described otherwise. Individual study characteristics are presented in Table 1.



Table 1. Characteristics and Results of Included Studies on the Association between the Autism Polygenic Score and Outcome Measures.

| First author (year), reference | Outcome category        | Sample characteristics                                                                                                                                                                                                         | PGS calculation method and P threshold                                                                                                                        | Outcome variables                                                                                                                                                                          | Covariates                                               | Results                                                                                                                                                                                             | Significance threshold |
|--------------------------------|-------------------------|--------------------------------------------------------------------------------------------------------------------------------------------------------------------------------------------------------------------------------|---------------------------------------------------------------------------------------------------------------------------------------------------------------|--------------------------------------------------------------------------------------------------------------------------------------------------------------------------------------------|----------------------------------------------------------|-----------------------------------------------------------------------------------------------------------------------------------------------------------------------------------------------------|------------------------|
| <b>Autism diagnosis</b>        |                         |                                                                                                                                                                                                                                |                                                                                                                                                               |                                                                                                                                                                                            |                                                          |                                                                                                                                                                                                     |                        |
| Debost (2022) <sup>32</sup>    | Autism diagnosis, other | A total of 22,153 iPsych participants were included in the analyses (10,890 female). Participants were assessed at ages $\geq 5$ and $\geq 10$ . Participants were all Danish and genetic ancestry was restricted to European. | LDpred and BOLT-LMM. Bayesian approach, no threshold needed                                                                                                   | <b>First diagnosis of autism at age <math>\geq 5</math>.</b> Diagnoses of early childhood infection according to ICD-8 or ICD-10, including viral, bacterial, fungal, and other infections | Sex, calendar period and 10 PCs                          | <b>The autism polygenic score was significantly associated with autism diagnosis (HR = 1.34, 95% CI, 1.30–1.38)</b> and it showed mixed associations with odds of infection in different quartiles. | Not reported           |
| Grove (2019) <sup>10</sup>     | Autism diagnosis        | Polygenic score analyses were carried out on combined iPsych and PGC participants of European ancestry. The sample consisted of                                                                                                | Ricopili, Plink. $5 \times 10^{-8}$ , $10^{-6}$ , $10^{-4}$ , 0.001, 0.01, 0.05, 0.1, 0.2, 0.5 and 1. The reported pooled OR is based on p-value threshold .1 | <b>Autism diagnosis</b>                                                                                                                                                                    | Relevant PCs and indicator variable for genotyping waves | <b>The autism polygenic score significantly positively associated with autism diagnosis (R<sup>2</sup> = 0.0245, P = <math>5.58 \times 10^{-140}</math>), with a</b>                                | Not reported           |

|                             |                         |                                                                                                                                                                                                                                                    |                                                                                                                                                                                  |                                                                             |                                                                                                                                                                |                                                                                                                                                                                          |  |
|-----------------------------|-------------------------|----------------------------------------------------------------------------------------------------------------------------------------------------------------------------------------------------------------------------------------------------|----------------------------------------------------------------------------------------------------------------------------------------------------------------------------------|-----------------------------------------------------------------------------|----------------------------------------------------------------------------------------------------------------------------------------------------------------|------------------------------------------------------------------------------------------------------------------------------------------------------------------------------------------|--|
|                             |                         | 13,076 cases (21.6% female) and 22,664 controls (49.3% female). Participants were born between 1981 and 2005. iPsych participants are all Danish. PGC participants are American, Swedish and Finnish. Genetic ancestry was restricted to European. |                                                                                                                                                                                  |                                                                             |                                                                                                                                                                | <b>pooled polygenic score-based case-control odds ratio (OR) = 1.33 (95% CI 1.30 – 1.36). ORs increased with increasing polygenic scores</b>                                             |  |
| Hannon (2018) <sup>33</sup> | Autism diagnosis, Other | Minerva cohort, a subset of 1,316 iPsych samples, including an equal number of autism cases (52% male, mean gestational age = 39.6 (1.82)) and controls (49.8% male,                                                                               | Plink. Ten different significance thresholds (pT) from $5 \times 10^{-8}$ to 1 to identify the optimal set of SNPs with the largest difference between autism cases and controls | DNA methylation from neonatal dried blood samples. <b>Autism diagnosis.</b> | The number of non-missing genotypes contributing to the polygenic score, the first five genetic principal components, sex, experimental array number, six cell | The autism polygenic score significantly associated with two differentially methylated positions (DMPs) (cg02771117, P = $3.14 \times 10^{-8}$ ; cg27411982, P = $8.38 \times 10^{-8}$ ) |  |

|                             |                                                        |                                                                                                                                                                                                                                   |                                                                                                                                                  |                                                                            |                                                                         |                                                                                                                                                                                                                                                                       |                                             |
|-----------------------------|--------------------------------------------------------|-----------------------------------------------------------------------------------------------------------------------------------------------------------------------------------------------------------------------------------|--------------------------------------------------------------------------------------------------------------------------------------------------|----------------------------------------------------------------------------|-------------------------------------------------------------------------|-----------------------------------------------------------------------------------------------------------------------------------------------------------------------------------------------------------------------------------------------------------------------|---------------------------------------------|
|                             |                                                        | mean gestational age = 39.6 (1.2)). Birth years for cases and controls range from 1998 to 2002. Participants are all Danish. Genetic ancestry was not reported.                                                                   |                                                                                                                                                  |                                                                            | composition variables, smoking score, gestational age, and birth weight | at $P < 1 \times 10^{-7}$ and 49 DMPs associated at a more relaxed “discovery” P value threshold ( $P < 5 \times 10^{-5}$ ). <b>The autism polygenic score was associated with autism case- control status (<math>R^2 = 3.12\%</math>, <math>P = 9.49E-13</math>)</b> |                                             |
| Jansen (2020) <sup>34</sup> | Autism diagnosis, specific psychiatric classifications | Inside-Out: Clinical sample in the Netherlands, N = 688, age range 2-18 (mean = 9.06, SD 2.66). Autism only: n = 295, 27% female. ADHD only: n = 280, 25% female. autism+ADHD sample: n = 113, 24% female. NESCOG control sample, | PRSice. 8 P-values: <0.01, <0.05, <0.1, <0.2, <0.3, <0.4, <0.5, <1. Selection of most optimal p-value threshold with highest explained variance. | <b>DSM-IV autism and ADHD diagnosis,</b> Parent-rated CBCL syndrome scales | Sex and 8 PCs                                                           | <b>The autism polygenic score was not significantly associated with ADHD, autism, or combined ADHD/autism status, <math>p = 1.00</math>.</b> Associations with CBCL syndrome scales were not calculated, due to low correlations.                                     | Bonferroni correction applied, $p < .05/72$ |

|                           |                         |                                                                                                                                                                                                                            |                                                |                                                                       |                                                                                                                                          |                                                                                                                                                                                                                                                |              |
|---------------------------|-------------------------|----------------------------------------------------------------------------------------------------------------------------------------------------------------------------------------------------------------------------|------------------------------------------------|-----------------------------------------------------------------------|------------------------------------------------------------------------------------------------------------------------------------------|------------------------------------------------------------------------------------------------------------------------------------------------------------------------------------------------------------------------------------------------|--------------|
|                           |                         | Netherlands, n = 943, age range 17-79, 63% female. Both Inside-Out and NESCOG participants are Dutch. European ancestry was restricted to European.                                                                        |                                                |                                                                       |                                                                                                                                          |                                                                                                                                                                                                                                                |              |
| Klei (2021) <sup>25</sup> | Autism diagnosis, other | Combined SSC, PAGES and eMerge sample 6,022 participants (3,011 matched pairs). Of the cases, 305 carried 1 or more potentially damaging variants. Participants were all American and ancestry was restricted to European. | GBLUP. Bayesian approach, no threshold needed. | <b>Autism diagnosis</b> and potentially damaging variant (PDV) status | No covariates for primary case-control analysis and PDV carrier analyses. Additional analyses of PDV carrier status included 3 or 10 PCs | <b>The autism polygenic score significantly positively associated with autism diagnosis (OR = 1.21, 95% CI 1.15 - 1.28)</b> , and negatively associated with potential damaging variant status in autism cases (OR = 0.79, 95% CI 0.70 - 0.89) | Not reported |

|                                       |                                                               |                                                                                                                                                                                                                                                                                                                                                                                                                                                    |                                          |                                         |                                                         |                                                                                                                                                                                                                                                                                                                                                                                                                                                                                                                  |                                                            |
|---------------------------------------|---------------------------------------------------------------|----------------------------------------------------------------------------------------------------------------------------------------------------------------------------------------------------------------------------------------------------------------------------------------------------------------------------------------------------------------------------------------------------------------------------------------------------|------------------------------------------|-----------------------------------------|---------------------------------------------------------|------------------------------------------------------------------------------------------------------------------------------------------------------------------------------------------------------------------------------------------------------------------------------------------------------------------------------------------------------------------------------------------------------------------------------------------------------------------------------------------------------------------|------------------------------------------------------------|
| <p>Mattheisen (2022)<sup>27</sup></p> | <p>Autism diagnosis, specific psychiatric classifications</p> | <p>iPsych and PGC participants that were included in the ADHD and autism GWAS<sup>10,35</sup>, no further sample description. The final combined dataset comprised 34,462 cases of which 9,315 with autism-only, 2,304 with autism and ADHD, and 41,201 controls. iPsych samples are all Danish. PGC participants are American, Swedish, Belgian, German, Irish, Dutch, Spanish, Swiss, English, and Israeli, Canadian, Chinese and Norwegian.</p> | <p>Ricopili, PLINK. Leave-P &lt; 0.5</p> | <p><b>Autism and ADHD diagnosis</b></p> | <p>5 PCs, additional analyses with sex as covariate</p> | <p>The autism polygenic score distinguished ADHD cases from controls (OR = 1.08, 95% CI = 1.06 – 1.11, p = 7.5 x 10<sup>-12</sup>), <b>autism cases from controls (OR = 1.21, 95% CI = 1.18 – 1.24, p = 1.2 x 10<sup>-48</sup>)</b>, comorbid (ADHD+autism) cases from controls (OR = 1.22, 95% CI = 1.16 – 1.29, p = 3.5 x 10<sup>-14</sup>), comorbid cases from ADHD-only cases (OR = 1.13, 95% CI = 1.08 – 1.19, p = 4.7 x 10<sup>-7</sup>), autism-only cases from ADHD-only cases (OR = 1.12, 95% CI =</p> | <p>Bonferroni correction for 2 x 6 tests: p &lt; .0042</p> |
|---------------------------------------|---------------------------------------------------------------|----------------------------------------------------------------------------------------------------------------------------------------------------------------------------------------------------------------------------------------------------------------------------------------------------------------------------------------------------------------------------------------------------------------------------------------------------|------------------------------------------|-----------------------------------------|---------------------------------------------------------|------------------------------------------------------------------------------------------------------------------------------------------------------------------------------------------------------------------------------------------------------------------------------------------------------------------------------------------------------------------------------------------------------------------------------------------------------------------------------------------------------------------|------------------------------------------------------------|

|                               |                  |                                                                                                         |                                                   |                                                                                      |                                    |                                                                                                                                                                                                                                                                                                                                                                                                |               |
|-------------------------------|------------------|---------------------------------------------------------------------------------------------------------|---------------------------------------------------|--------------------------------------------------------------------------------------|------------------------------------|------------------------------------------------------------------------------------------------------------------------------------------------------------------------------------------------------------------------------------------------------------------------------------------------------------------------------------------------------------------------------------------------|---------------|
|                               |                  | Genetic ancestry was restricted to European.                                                            |                                                   |                                                                                      |                                    | 1.09 – 1.15, $p = 1.2 \times 10^{-15}$ ), but not comorbid cases from autism-only cases (OR = 1.01, 95% CI = 0.96 – 1.6, $p = 0.68$ ), ADHD + intellectual disability from ADHD without intellectual disability (OR = 0.94, 95% CI = 0.86 – 1.03, $p = .19$ ) and autism + intellectual disability from autism without intellectual disability (OR = 0.89, 95% CI = 0.81 – 0.97, $p = .0072$ ) |               |
| Schendel (2022) <sup>36</sup> | Autism diagnosis | The total sample consisted of 11,339 iPsych participants with autism (21.3% female) and 20,175 controls | BOLT-LMM. Bayesian approach, no threshold needed. | <b>Psychiatric diagnoses obtained from Psychiatric Central Research and National</b> | Genotype waves, 2 PCs, sex and age | <b>The adjusted autism polygenic score z-score was higher in cases than controls (difference in</b>                                                                                                                                                                                                                                                                                            | Not reported. |

|  |  |                                                                                                                           |  |                                                                                                    |  |                                                                                                                                                                                                                                                                                                                                                                                                                                                     |  |
|--|--|---------------------------------------------------------------------------------------------------------------------------|--|----------------------------------------------------------------------------------------------------|--|-----------------------------------------------------------------------------------------------------------------------------------------------------------------------------------------------------------------------------------------------------------------------------------------------------------------------------------------------------------------------------------------------------------------------------------------------------|--|
|  |  | (49.4% female). All participants were Danish and born between 1981 and 2005. Genetic ancestry was restricted to European. |  | <b>Patient Registers, based on the International Classification of Diseases (ICD-8 and ICD-10)</b> |  | <b>means - 0.24 (95% CI -0.26 - -0.21), R2 on liability scale 0.12, Nagelkerke's R2 0.18). ORs of being diagnosed with autism increase with increasing polygenic score deciles, achieving 2.4-fold (OR = 2.35, 95% CI 2.11 - 2.63) increase in likelihood of being diagnosed with autism in 10th decile. This OR only slightly decreased after adjusting for psychiatric family history (e.g. 2.35 in 10th decile to 2.14 (95% CI 1.91 - 2.40).</b> |  |
|--|--|---------------------------------------------------------------------------------------------------------------------------|--|----------------------------------------------------------------------------------------------------|--|-----------------------------------------------------------------------------------------------------------------------------------------------------------------------------------------------------------------------------------------------------------------------------------------------------------------------------------------------------------------------------------------------------------------------------------------------------|--|

|                            |                                                                            |                                                                                                                                                                                                                                                                                                                  |                                                                                                                                                                  |                                                                                                                      |                                                |                                                                                                                                                                                |            |
|----------------------------|----------------------------------------------------------------------------|------------------------------------------------------------------------------------------------------------------------------------------------------------------------------------------------------------------------------------------------------------------------------------------------------------------|------------------------------------------------------------------------------------------------------------------------------------------------------------------|----------------------------------------------------------------------------------------------------------------------|------------------------------------------------|--------------------------------------------------------------------------------------------------------------------------------------------------------------------------------|------------|
| Trost (2022) <sup>30</sup> | Autism diagnosis                                                           | Cases were 20,517 MSSNG and SSC participants and controls were 2,504 1000G participants Male:female ratio of the MSSNG sample is 4:1. MSSNG and SSC participants are all American. 1000G participants are recruited from 26 different countries all over the world. Genetic ancestry was restricted to European. | Plink. $P \leq .1$                                                                                                                                               | <b>Autism diagnosis</b>                                                                                              | Sex                                            | <b>Higher autism polygenic score was weakly associated with autism susceptibility (OR = 1.03, <math>p = 2.5 \times 10^{-3}</math>, Nagelkerke's <math>R^2 = 0.0039</math>)</b> | Not needed |
| Zhang (2022) <sup>37</sup> | Autism diagnosis, specific psychiatric classifications, physical wellbeing | The sample consisted of 3,189 ANGI individuals diagnosed with an eating disorder, 134 of whom were also diagnosed with                                                                                                                                                                                           | Plink. First principal components for polygenic scores built from 10 thresholds (p-values: $5 \times 10^{-8}$ , $1 \times 10^{-6}$ , $1 \times 10^{-4}$ , 0.001, | Eating disorder severity and persistence, eating disorder treatment, suicidal behaviour and self-harm. <b>Autism</b> | Sex and birth year in 3 year intervals, 10 PCs | The autism polygenic score was not statistically significantly associated with any ED severity, persistence, and treatment                                                     | FDR        |



|                               |                                                                               |                                                                                                                                                                                                                                                  |                                                                                                                                     |                                                                                                                                                                                                   |                                                                                            |                                                                                                                                                                                                                                 |                                                            |
|-------------------------------|-------------------------------------------------------------------------------|--------------------------------------------------------------------------------------------------------------------------------------------------------------------------------------------------------------------------------------------------|-------------------------------------------------------------------------------------------------------------------------------------|---------------------------------------------------------------------------------------------------------------------------------------------------------------------------------------------------|--------------------------------------------------------------------------------------------|---------------------------------------------------------------------------------------------------------------------------------------------------------------------------------------------------------------------------------|------------------------------------------------------------|
|                               |                                                                               | autism. Of the individuals without autism, 1.9% was male and mean birth year was 1988.77 (5.54). Of the individuals with autism, 5.2% was male and mean birth year was 1989.04. All participants were Swedish. Genetic ancestry is not reported. | 0.01, 0.05, 0.1, 0.2, 0.5, 1)                                                                                                       | <b>diagnostic status.</b>                                                                                                                                                                         |                                                                                            | outcomes nor suicidal behavior and self-harm (OR range: 0.79–1.02, $\beta$ range: –0.34–0.03, IRR range: 0.82–1.06). <b>Autism polygenic score was not associated with autism diagnostic status (<math>R^2 = 0.0182</math>)</b> |                                                            |
| <b>Autistic traits</b>        |                                                                               |                                                                                                                                                                                                                                                  |                                                                                                                                     |                                                                                                                                                                                                   |                                                                                            |                                                                                                                                                                                                                                 |                                                            |
| Askeland (2020) <sup>38</sup> | Autistic traits, specific psychiatric classifications, early neurodevelopment | The sample was MoBa and the size varied per measure and age, ranging from 6,915 boys and 6,640 girls at its highest to 1,603 boys and 1,508 girls at its lowest. Overall, the sample contained about 50% girls.                                  | PRSice. First principal component for PGSs built from 10 thresholds (<5e–8, <1e–6, <1e–4, <.001, <.01, <.05, <.1., <.2, <.5. and 1) | Mother-reported questionnaire data at ages 6 and 18 months and 3,5, and 8 years: Social communication difficulties, repetitive behavior, inattention and hyperactivity, language difficulties and | Genotyping batch and 10 PCs. Sex differences assessed by adding sex as a grouping variable | In association analyses of autism polygenic score and repetitive behavior, social communication, language difficulties, motor difficulties, hyperactivity and inattention at several ages                                       | Bonferroni-corrected for number of effective tests: .05/16 |

|  |  |                                                                                                                                                                   |  |                    |  |                                                                                                                                                                                                                                                                                                                                                                                     |  |
|--|--|-------------------------------------------------------------------------------------------------------------------------------------------------------------------|--|--------------------|--|-------------------------------------------------------------------------------------------------------------------------------------------------------------------------------------------------------------------------------------------------------------------------------------------------------------------------------------------------------------------------------------|--|
|  |  | Participants were assessed at 6 and 18 months, 3 years, 5 years and 8 years. The participants were all Norwegian and genetic ancestry was restricted to European. |  | motor difficulties |  | in childhood, positive associations were only reported for language difficulties at 18 months ( $\beta = .032$ , CI = 0.012–0.052), motor difficulties at 3 years ( $\beta = .034$ , CI = 0.012–0.057), hyperactivity at 8 years ( $\beta = .038$ , CI = 0.013–0.063), and inattention at 8 years ( $\beta = .052$ , CI = 0.027–0.077). No other significant results were reported. |  |
|--|--|-------------------------------------------------------------------------------------------------------------------------------------------------------------------|--|--------------------|--|-------------------------------------------------------------------------------------------------------------------------------------------------------------------------------------------------------------------------------------------------------------------------------------------------------------------------------------------------------------------------------------|--|

|                         |                        |                                                                                                                                                                                                                                                                                                                                                                                                                                                      |                                                     |                                                                                                                                                          |                                                           |                                                                                                                                                                                                                                                                                                   |                                                         |
|-------------------------|------------------------|------------------------------------------------------------------------------------------------------------------------------------------------------------------------------------------------------------------------------------------------------------------------------------------------------------------------------------------------------------------------------------------------------------------------------------------------------|-----------------------------------------------------|----------------------------------------------------------------------------------------------------------------------------------------------------------|-----------------------------------------------------------|---------------------------------------------------------------------------------------------------------------------------------------------------------------------------------------------------------------------------------------------------------------------------------------------------|---------------------------------------------------------|
| Li (2020) <sup>39</sup> | Autistic traits, other | 188 KONTAKT participants were included in polygenic score analyses. 99 (26 female, 56 adolescent and 43 children) participants belonged to the active social skills group training group and 89 (26 female, 60 adolescent and 29 children) received standard care. 169 participants had outcome data at post-intervention, and 152 participants at follow-up. 99 (26 female) participants belonged to the active social skills group training group. | PRSice. Five Pts (<0.01, <0.05, <0.1, <0.5, and <1) | SRS at baseline. Intervention outcome after social skills group training, measured by parent-reported SRS, carrier status of clinically significant CNVs | Polygenic score interaction effect, age group, sex, 4 PCs | No correlation between autism polygenic score and baseline SRS ( $r = -.074$ ) or carrier status of clinically significant CNVs was observed. Higher autism polygenic score was associated with inferior outcome after social skills group training at follow up ( $\beta = 6.47$ , $P = 0.019$ ) | Multiple testing correction applied, unclear which type |
|-------------------------|------------------------|------------------------------------------------------------------------------------------------------------------------------------------------------------------------------------------------------------------------------------------------------------------------------------------------------------------------------------------------------------------------------------------------------------------------------------------------------|-----------------------------------------------------|----------------------------------------------------------------------------------------------------------------------------------------------------------|-----------------------------------------------------------|---------------------------------------------------------------------------------------------------------------------------------------------------------------------------------------------------------------------------------------------------------------------------------------------------|---------------------------------------------------------|

|                            |                 |                                                                                                                                                                                                                                                                                       |                                             |                                                                                                 |          |                                                                                                                                                                                                                                                                                                                                  |  |
|----------------------------|-----------------|---------------------------------------------------------------------------------------------------------------------------------------------------------------------------------------------------------------------------------------------------------------------------------------|---------------------------------------------|-------------------------------------------------------------------------------------------------|----------|----------------------------------------------------------------------------------------------------------------------------------------------------------------------------------------------------------------------------------------------------------------------------------------------------------------------------------|--|
|                            |                 | Participants were all Swedish. Genetic ancestry was restricted to European.                                                                                                                                                                                                           |                                             |                                                                                                 |          |                                                                                                                                                                                                                                                                                                                                  |  |
| Nayar (2021) <sup>40</sup> | Autistic traits | The sample was the SSC and included a maximum of 2,618 mothers, 2,614 fathers, and 2,621 children with autism. The child sample included 348 female and 2,273 male subjects. Children were between 4 and 18 years old. Participants were American. Genetic ancestry was not reported. | PRScs-auto. No threshold, Bayesian approach | Parental Broad Autism Phenotype Questionnaire scores, proband ADOS, ADI-R, SRS and RBS-R scores | Age, PCs | In all association analyses of autism polygenic score with BAPQ, ADI total scales and subscales, SRS, and RBS-R total in mothers, fathers and probands, only positive associations between mother's polygenic score and mothers BAPQ total and pragmatic scores were reported (effect sizes not available). No other significant |  |

|                             |                                                       |                                                                                                                                                                                                                                                                       |                                                                                                                                                                                                                               |                                                                                                                                                                 |                                  |                                                                                                                                                                                                                                                                                                          |              |
|-----------------------------|-------------------------------------------------------|-----------------------------------------------------------------------------------------------------------------------------------------------------------------------------------------------------------------------------------------------------------------------|-------------------------------------------------------------------------------------------------------------------------------------------------------------------------------------------------------------------------------|-----------------------------------------------------------------------------------------------------------------------------------------------------------------|----------------------------------|----------------------------------------------------------------------------------------------------------------------------------------------------------------------------------------------------------------------------------------------------------------------------------------------------------|--------------|
|                             |                                                       |                                                                                                                                                                                                                                                                       |                                                                                                                                                                                                                               |                                                                                                                                                                 |                                  | results were reported.                                                                                                                                                                                                                                                                                   |              |
| Reed (2021) <sup>41</sup>   | Autistic traits, emotion recognition                  | ALSPAC includes a total of 14,901 participants, of which about 50% is female. Detailed information about the participants that were included in this study specifically was not reported. All participants were British. Genetic ancestry was restricted to European. | Plink. Thirteen different polygenic scores based on p-values 0.5, 0.4, 0.3, 0.2, 0.1, 0.05, 0.01, 1x10 <sup>-3</sup> , 1x10 <sup>-4</sup> , 1x10 <sup>-5</sup> , 1x10 <sup>-6</sup> , 1x10 <sup>-7</sup> , 5x10 <sup>-8</sup> | Emotion recognition at age 8 assessed using DANVA and at age 24 using the Emotion Recognition task (ERT). <b>Social autistic traits assessed using the SCDC</b> | Child's sex and the first 10 PCs | <b>The autism polygenic score was significantly positively associated with social autistic traits at age 8 (SCDC; (b = 0.05; 95% CI: 0.01 to 0.08; p = .01), but not with emotion recognition at age 8 (DANVA) and age 24 (ERT). After correction for multiple testing no results remain significant</b> |              |
| Riglin (2021) <sup>42</sup> | Autistic traits, specific psychiatric classifications | ALSPAC includes a total of 14901 participants, of which about 50% is female. Polygenic scores were                                                                                                                                                                    | PRSice. P < 0.05                                                                                                                                                                                                              | ADHD and autism symptoms. Parent-rated at 11/12 and 25 years of age (ADHD: SDQ, autism: SCDC).                                                                  | Not reported                     | <b>The autism polygenic score does not significantly associate with parent- and self-reported ADHD and autism</b>                                                                                                                                                                                        | Not reported |

|                                 |                                         |                                                                                                                                                                                                                                   |                                                                                                                    |                                                                                                                          |                                                        |                                                                                                                                                                                                                                            |                                           |
|---------------------------------|-----------------------------------------|-----------------------------------------------------------------------------------------------------------------------------------------------------------------------------------------------------------------------------------|--------------------------------------------------------------------------------------------------------------------|--------------------------------------------------------------------------------------------------------------------------|--------------------------------------------------------|--------------------------------------------------------------------------------------------------------------------------------------------------------------------------------------------------------------------------------------------|-------------------------------------------|
|                                 |                                         | derived for 9912 children. Detailed information about the participants that were included in this study specifically was not reported. All participants were British. Genetic ancestry was restricted to European.                |                                                                                                                    | Self-rated at 25 years of age (ADHD: SDQ, autism: AQ)                                                                    |                                                        | <b>symptoms (<math>\geq .01</math>)</b>                                                                                                                                                                                                    |                                           |
| Serdarevic (2020) <sup>43</sup> | Autistic traits, early neurodevelopment | The sample was Generation R and consisted of 1,174 infants between 9 and 20 weeks old. Mean age was 12.6 weeks (SD = 20). 48.7% were girls. Mothers were on average 31.3 years old. All participants were Dutch. Genetic ancestry | PRSice . Six different p-value thresholds (pTs) with pT , .001, pT , .01, pT , .05, pT , .10, pT , .50, and pT , 1 | Infant neuromotor scores (modified version of the Touwen's Neurodevelopmental Examination), <b>autistic traits (SRS)</b> | Child's sex, maternal age and maternal education level | <b>Children with higher autism polygenic score had higher autistic trait scores at 6 years of age (pT , .50, b = .08, 95% CI = .03, .13, p = .01).</b> A higher autism polygenic score was positively associated with less optimal overall | Bonferroni correction: p = .05/10 = .005) |

|  |  |                             |  |  |  |                                                                                                                                                                                                                                                                                                                                                                                                                                               |
|--|--|-----------------------------|--|--|--|-----------------------------------------------------------------------------------------------------------------------------------------------------------------------------------------------------------------------------------------------------------------------------------------------------------------------------------------------------------------------------------------------------------------------------------------------|
|  |  | was restricted to European. |  |  |  | <p>neuromotor development during infancy (e.g., with GWAS pT , 1, b = .048, 95% confidence interval [CI] = .007, .090, p = .02) There was a relationship between autism polygenic score and overall muscle tone and, in particular, low muscle tone (e.g., with GWAS pT , .50, b = .068, 95% CI = .015, .120, p = .01). Stratified analysis showed that this association was present in boys only. In addition, boys with a higher autism</p> |
|--|--|-----------------------------|--|--|--|-----------------------------------------------------------------------------------------------------------------------------------------------------------------------------------------------------------------------------------------------------------------------------------------------------------------------------------------------------------------------------------------------------------------------------------------------|

|                                |                                         |                                                                                                                                                                                                                                             |                                                                                                                 |                                                                                                                                                          |       |                                                                                                                                                                                                                                                                                                                                                                                                          |                                               |
|--------------------------------|-----------------------------------------|---------------------------------------------------------------------------------------------------------------------------------------------------------------------------------------------------------------------------------------------|-----------------------------------------------------------------------------------------------------------------|----------------------------------------------------------------------------------------------------------------------------------------------------------|-------|----------------------------------------------------------------------------------------------------------------------------------------------------------------------------------------------------------------------------------------------------------------------------------------------------------------------------------------------------------------------------------------------------------|-----------------------------------------------|
|                                |                                         |                                                                                                                                                                                                                                             |                                                                                                                 |                                                                                                                                                          |       | polygenic score had less optimal scores in senses and other observations during infancy (e.g., with GWAS pT, .043, b = .003, 95% CI = .003, .084, p = .02)                                                                                                                                                                                                                                               |                                               |
| Takahashi (2020) <sup>44</sup> | Autistic traits, early neurodevelopment | This study included 876 HBC participants born between December 2007 and June 2011. Polygenic score analyses were performed on 726 participants (51.4% boys). All participants were born in Japan and most (99.1%) were of Japanese descent. | PRSice . Different p-values ranging from $5 \times 10^{-8}$ to greater than .99, of which best fit was selected | Neurodevelopmental progress at 18 months (MSEL), <b>autistic traits at age 6 (ADOS-2) total scores, social affect and restricted repetitive behavior</b> | 4 PCs | <b>The autism polygenic score was associated with autistic traits measured by total scores on the ADOS-2 (<math>R^2 = 0.024</math>; <math>\beta</math>, 0.71; SE, 0.25; corrected P = .03) and social affect (<math>R^2 = 0.027</math>; <math>\beta</math>, 0.63; SE, 0.22; corrected P = .03) but not restricted repetitive behavior (<math>R^2 = 0.023</math>; <math>\beta</math>, 0.19; SE, 0.07;</b> | Bonferroni correction for 8 independent tests |



|  |  |  |  |  |  |                                                                                                                                                                                                                                                                                                                                                                                                                                                                                               |  |
|--|--|--|--|--|--|-----------------------------------------------------------------------------------------------------------------------------------------------------------------------------------------------------------------------------------------------------------------------------------------------------------------------------------------------------------------------------------------------------------------------------------------------------------------------------------------------|--|
|  |  |  |  |  |  | <p><b>corrected P = .06).</b> The association of autism polygenic score with infant neurodevelopment was most significant for gross motor skills (<math>R^2 = 0.015</math>; <math>\beta, -1.25</math>; SE, 0.39; corrected P = .01) and receptive language skills (<math>R^2 = 0.014</math>; <math>\beta, -1.19</math>; SE, 0.39; corrected P = .02) measured by the MSEL, but not with fine motor skills, expressive language development and visual reception (<math>p \geq .22</math>)</p> |  |
|--|--|--|--|--|--|-----------------------------------------------------------------------------------------------------------------------------------------------------------------------------------------------------------------------------------------------------------------------------------------------------------------------------------------------------------------------------------------------------------------------------------------------------------------------------------------------|--|

|                             |                                          |                                                                                                                                                                                                                                                       |                                        |                                                                                                                               |                                      |                                                                                                                                                                                                                                                                                                                             |     |
|-----------------------------|------------------------------------------|-------------------------------------------------------------------------------------------------------------------------------------------------------------------------------------------------------------------------------------------------------|----------------------------------------|-------------------------------------------------------------------------------------------------------------------------------|--------------------------------------|-----------------------------------------------------------------------------------------------------------------------------------------------------------------------------------------------------------------------------------------------------------------------------------------------------------------------------|-----|
| Taylor (2019) <sup>45</sup> | Autistic traits                          | Participants were 9, 12, 15 or 18 year-old CATSS participants. Sample size depended on the outcome measure. Polygenic score analyses included 13412 children (50.2% females). Participants were Swedish. Genetic ancestry was restricted to European. | Plink. P < .50                         | Autistic traits (A-TAC)                                                                                                       | Principal components, sex, and age   | Autism polygenic score significantly associated with autistic traits in full sample (B = 0.043 SE (0.014), p = 5.4 <sup>^</sup> 10x-3a, R2 = 9.5 x 10 <sup>^-4</sup> ), and in a sample where people diagnosed with autism were excluded (B = 0.036 SE (0.013), p = 6.7 <sup>^</sup> 10x-3a, R2 = 8.2 x 10 <sup>^-4</sup> ) | FDR |
| Thomas (2022) <sup>46</sup> | Autistic traits, general psychopathology | For the SPARK cohort, 6,064 participants were included, 1,177 of whom were female, mean age 5 (SD =2.7). For the ABCD cohort, 5,285 participants were included, of whom 2,459                                                                         | LDpred.No threshold, bayesian approach | SPARK: <b>Clinical autism scales DCDQ, RBS-R, SCQ</b> , secondary phenotypes CBCL syndrome scales. ABCD: CBCL syndrome scales | Phenotypes residualized for age, sex | <b>The autism polygenic score only had a slight positive association with DCDQ movement <math>\beta</math> = 0.03 and a slight negative association with RBS-R compulsive <math>\beta</math> = -0.03, neither</b>                                                                                                           | FDR |

|                             |                                                          |                                                                                                                                                                                                                                                                                   |                |                                                                                                                                                                                                                                           |                                              |                                                                                                                                                                                                                                                                                                                                                                  |               |
|-----------------------------|----------------------------------------------------------|-----------------------------------------------------------------------------------------------------------------------------------------------------------------------------------------------------------------------------------------------------------------------------------|----------------|-------------------------------------------------------------------------------------------------------------------------------------------------------------------------------------------------------------------------------------------|----------------------------------------------|------------------------------------------------------------------------------------------------------------------------------------------------------------------------------------------------------------------------------------------------------------------------------------------------------------------------------------------------------------------|---------------|
|                             |                                                          | were female.<br>Mean age was 9.9 (SD = 0.6)<br>Participants were American.<br>Genetic ancestry was restricted to European.                                                                                                                                                        |                |                                                                                                                                                                                                                                           |                                              | <b>of which was significant after FDR. No other associations were reported</b>                                                                                                                                                                                                                                                                                   |               |
| Torske (2019) <sup>47</sup> | Autistic traits, Cognition and executive function, other | The sample consisted of 176 BUPGEN children, adolescents, and young adults who were referred to a specialized hospital unit for NDs for evaluation of autism (76.1% boys, mean age = 11.7, SD = 3.7. Participants were Norwegian.<br>Genetic ancestry was restricted to European. | Plink. P = 0.1 | <b>Social function (SRS),</b> executive function (Behavior rating inventory of executive function (BRIEFF)), including subscales (Behavior Regulation Index, Metacognition Index, Global Executive Composite), parental educational level | Age, sex, SRS scores, full-scale IQ, and PCs | The autism polygenic score differentiated between the typically developing children (TDC) and the clinical group (autism and subthreshold autism group, n = 176; t(203) = 2.61, 95% CI [1.2 × 10 <sup>-5</sup> , 8.7 × 10 <sup>-5</sup> ], P = 0.010. The polygenic score for autism also differentiated between the TDC and both the subthreshold autism group; | No correction |

|  |  |  |  |  |                                                                                                                                                                                                                                                                                                                                                                                                                                                                                                |  |
|--|--|--|--|--|------------------------------------------------------------------------------------------------------------------------------------------------------------------------------------------------------------------------------------------------------------------------------------------------------------------------------------------------------------------------------------------------------------------------------------------------------------------------------------------------|--|
|  |  |  |  |  | <p>t(83) = -2.07, 95% CI [-8.6 × 10<sup>-5</sup>, -1.7 × 10<sup>-6</sup>], P = 0.042 and the autism group t(147) = -2.63, 95% CI [-9.1 × 10<sup>-5</sup>, -1.3 × 10<sup>-5</sup>], P = 0.009. <b>There was a significant group difference between total SRS scores of the Low and the High INT PGS groups; total t-score t = 66.0 in the Low PGS group and t = 76.2 in the High PGS group; t(45) = -2.27, 95% CI [-19.11, -1.14], P = 0.028, Cohen's d = 0.66. There was a significant</b></p> |  |
|--|--|--|--|--|------------------------------------------------------------------------------------------------------------------------------------------------------------------------------------------------------------------------------------------------------------------------------------------------------------------------------------------------------------------------------------------------------------------------------------------------------------------------------------------------|--|

|  |  |  |  |  |  |                                                                                                                                                                                                                                                                                                                                                                                                                                                                                                                                                     |  |
|--|--|--|--|--|--|-----------------------------------------------------------------------------------------------------------------------------------------------------------------------------------------------------------------------------------------------------------------------------------------------------------------------------------------------------------------------------------------------------------------------------------------------------------------------------------------------------------------------------------------------------|--|
|  |  |  |  |  |  | <p>group difference between the Low and the High autism polygenic score groups in the BRI scores from the BRIEF; BRI <math>t = 62.9</math> in the Low polygenic score group and <math>t = 71.5</math> in the High polygenic score group; <math>t(49) = -2.51</math>, 95% CI <math>[-15.45, -1.71]</math>, <math>P = 0.015</math>, Cohen's <math>d = 0.69</math>. The autism polygenic score was not associated with parental educational level (fathers education level <math>P = 0.784</math>, mothers education level <math>P = 0.798</math>)</p> |  |
|--|--|--|--|--|--|-----------------------------------------------------------------------------------------------------------------------------------------------------------------------------------------------------------------------------------------------------------------------------------------------------------------------------------------------------------------------------------------------------------------------------------------------------------------------------------------------------------------------------------------------------|--|

|                          |                                                          |                                                                                                                                                                                                                                                                                                                                                                                                                                  |                                        |                                                                                                                                                                                                                                                                                                                                                                                   |                     |                                                                                                                                                                                                                                                                                                       |                                         |
|--------------------------|----------------------------------------------------------|----------------------------------------------------------------------------------------------------------------------------------------------------------------------------------------------------------------------------------------------------------------------------------------------------------------------------------------------------------------------------------------------------------------------------------|----------------------------------------|-----------------------------------------------------------------------------------------------------------------------------------------------------------------------------------------------------------------------------------------------------------------------------------------------------------------------------------------------------------------------------------|---------------------|-------------------------------------------------------------------------------------------------------------------------------------------------------------------------------------------------------------------------------------------------------------------------------------------------------|-----------------------------------------|
| Yap (2021) <sup>31</sup> | Autistic traits, cognition and executive function, other | 2,477 AAB participants that fell into four groups: 1) child participants (aged 2–17 years) diagnosed with autism or queried for the condition, with some multiply-affected families; 2) parents of children with autism; 3) siblings of diagnosed children who did not themselves meet autism criteria; and 4) unrelated children without an autism diagnosis and with no known first-degree relatives with an autism diagnosis. | Bayesian approach, no threshold needed | Autism group: parent- or caregiver-reported ADOS-2, ADOS-G, Developmental, Dimensional and Diagnostic Interview, Vineland Adaptive Behavior Scale, SSP-2. Parent: Communication Checklist-Adult. Siblings/unrelated: Social Responsiveness Scale. Cognitive function in all groups: MSEL or WISC-IV WASI. Sleep problems Autism/siblings/unrelated group: Children’s Sleep Habits | Age, sex and 20 PCs | <b>The autism polygenic score was not associated with autism-related phenotypes.</b> A nominal association with MSEL non-verbal development ( $r=-0.11$ , $p=7.4e-3$ in the autism group alone) and a marginal association with parental WASI matrix reasoning ( $r=0.07$ , $p=5.5e-2$ ) is reported. | Bonferroni correction: $p \leq 0.05/50$ |
|--------------------------|----------------------------------------------------------|----------------------------------------------------------------------------------------------------------------------------------------------------------------------------------------------------------------------------------------------------------------------------------------------------------------------------------------------------------------------------------------------------------------------------------|----------------------------------------|-----------------------------------------------------------------------------------------------------------------------------------------------------------------------------------------------------------------------------------------------------------------------------------------------------------------------------------------------------------------------------------|---------------------|-------------------------------------------------------------------------------------------------------------------------------------------------------------------------------------------------------------------------------------------------------------------------------------------------------|-----------------------------------------|

|                                      |                                                                               |                                                                                                                                                                                                                                                                                                                                                       |                                                                                                                                                                            |                                                                                                                                                                                                                              |                                                                                            |                                                                                                                                                                                                                                                                                                                                        |                                                             |
|--------------------------------------|-------------------------------------------------------------------------------|-------------------------------------------------------------------------------------------------------------------------------------------------------------------------------------------------------------------------------------------------------------------------------------------------------------------------------------------------------|----------------------------------------------------------------------------------------------------------------------------------------------------------------------------|------------------------------------------------------------------------------------------------------------------------------------------------------------------------------------------------------------------------------|--------------------------------------------------------------------------------------------|----------------------------------------------------------------------------------------------------------------------------------------------------------------------------------------------------------------------------------------------------------------------------------------------------------------------------------------|-------------------------------------------------------------|
|                                      |                                                                               | Participants were Australian and predominantly of European ancestry.                                                                                                                                                                                                                                                                                  |                                                                                                                                                                            |                                                                                                                                                                                                                              |                                                                                            |                                                                                                                                                                                                                                                                                                                                        |                                                             |
| Specific psychiatric classifications |                                                                               |                                                                                                                                                                                                                                                                                                                                                       |                                                                                                                                                                            |                                                                                                                                                                                                                              |                                                                                            |                                                                                                                                                                                                                                                                                                                                        |                                                             |
| Askeland (2020) <sup>38</sup>        | Autistic traits, specific psychiatric classifications, early neurodevelopment | The sample was MoBa and the size varied per measure and age, ranging from 6,915 boys and 6,640 girls at its highest to 1,603 boys and 1,508 girls at its lowest. Overall, the sample contained about 50% girls. Participants were assessed at 6 and 18 months, 3 years, 5 years and 8 years. The participants were all Norwegian and genetic ancestry | PRSice. First principal component for polygenic scores built from 10 thresholds ( $<5e-8$ , $<1e-6$ , $<1e-4$ , $<.001$ , $<.01$ , $<.05$ , $<.1$ , $<.2$ , $<.5$ . and 1) | Mother-reported questionnaire data at ages 6 and 18 months and 3,5, and 8 years: Social communication difficulties, repetitive behavior, <b>inattention and hyperactivity</b> , language difficulties and motor difficulties | Genotyping batch and 10 PCs. Sex differences assessed by adding sex as a grouping variable | In association analyses of autism polygenic score and repetitive behavior, social communication, language difficulties, motor difficulties, hyperactivity and inattention at several ages in childhood, positive associations were only reported for language difficulties at 18 months ( $\beta = .032$ , $CI = 0.012-0.052$ ), motor | Bonferroni-correction for number of effective tests: .05/16 |

|                              |                                                                 |                                                                                                                                                                                        |                 |                                                                                                                                                                                  |                          |                                                                                                                                                                                                                                                         |          |
|------------------------------|-----------------------------------------------------------------|----------------------------------------------------------------------------------------------------------------------------------------------------------------------------------------|-----------------|----------------------------------------------------------------------------------------------------------------------------------------------------------------------------------|--------------------------|---------------------------------------------------------------------------------------------------------------------------------------------------------------------------------------------------------------------------------------------------------|----------|
|                              |                                                                 | was restricted to European.                                                                                                                                                            |                 |                                                                                                                                                                                  |                          | difficulties at 3 years ( $\beta = .034$ , CI = 0.012–0.057), <b>hyperactivity at 8 years</b> ( $\beta = .038$ , CI = 0.013–0.063), and <b>inattention at 8 years</b> ( $\beta = .052$ , CI = 0.027–0.077). No other significant results were reported. |          |
| Havdahl (2022) <sup>48</sup> | Specific psychiatric classifications, physical wellbeing, other | The total sample included up to 14,539 MoBa mothers (mean age = 30.00, SD = 4.45) and 14,897 fathers (mean age = 32.46, SD = 5.13) depending on the outcome measure. Participants were | PRSice. P < .05 | Pregnancy-related factors related to maternal lifestyle and health behaviors, metabolism, immune system, other physical health conditions, and (indications for) medication use. | Genotyping batch, 10 PCs | <b>Maternal autism polygenic score was associated with higher odds of experiencing lifetime depression (OR 1.12 (1.08 to 1.16), p= 9.70 × 10<sup>-9</sup>) and depression/anxiety symptoms</b>                                                          | P < .002 |



|  |  |                                                         |  |  |  |                                                                                                                                                                                                                                                                                                                                                                                                                                             |
|--|--|---------------------------------------------------------|--|--|--|---------------------------------------------------------------------------------------------------------------------------------------------------------------------------------------------------------------------------------------------------------------------------------------------------------------------------------------------------------------------------------------------------------------------------------------------|
|  |  | Norwegian. Genetic ancestry was restricted to European. |  |  |  | <p><b>(OR 1.13 (1.06 to 1.19), p = 3.62 × 10<sup>-5</sup>).</b> Weak evidence for association with migraine (OR 1.10 (1.02 to 1.18), p = .009) and urinary tract infection (OR 1.08 (1.02 to 1.14), p = .005) during pregnancy. No significant associations with other pregnancy-related factors.</p> <p><b>Paternal autism polygenic score was not significantly associated with any pregnancy-related factors measured in fathers</b></p> |
|--|--|---------------------------------------------------------|--|--|--|---------------------------------------------------------------------------------------------------------------------------------------------------------------------------------------------------------------------------------------------------------------------------------------------------------------------------------------------------------------------------------------------------------------------------------------------|

|                              |                                      |                                                                                                                                                                                                                                                                                                                |                                   |                                                |                                                                                               |                                                                                                                                                                                                            |                       |
|------------------------------|--------------------------------------|----------------------------------------------------------------------------------------------------------------------------------------------------------------------------------------------------------------------------------------------------------------------------------------------------------------|-----------------------------------|------------------------------------------------|-----------------------------------------------------------------------------------------------|------------------------------------------------------------------------------------------------------------------------------------------------------------------------------------------------------------|-----------------------|
| Hjortoj (2019) <sup>49</sup> | Specific psychiatric classifications | The sample consisted of 88,637 iPsych individuals, of whom 28711 were non-psychiatric controls (50.9% male), 3,533 had schizophrenia (55.9% males), and 56,393 had another psychiatric disorder (53.0% male). Participants were born between 1981 and 2001 and were Danish. Genetic ancestry was not reported. | PGS method not reported, P = 0.05 | Clinical diagnosis of cannabis use disorder    | 4 PCs, sex, birth year, and calendar year                                                     | The autism polygenic score was not associated with cannabis use disorder in patients with schizophrenia and controls, and a negative association was observed in patients with other psychiatric disorders | Not reported          |
| Jansen (2021) <sup>50</sup>  | Specific psychiatric classifications | Inside-Out: Clinical sample in the Netherlands, N = 688, age range 2-18 (mean 9.06, SD 2.66).                                                                                                                                                                                                                  | PRSice. p < 1                     | Case-control status for any DSM classification | 8 PCs to account for population stratification, chip (GSA or Psych Chip, to correct for array | The autism polygenic score was not significantly associated with case/control status for any                                                                                                               | Bonferroni correction |

|                          |                                      |                                                                                                                                                                                                                                                                                       |                      |                                                    |                                                                                                                           |                                                                                                                                   |     |
|--------------------------|--------------------------------------|---------------------------------------------------------------------------------------------------------------------------------------------------------------------------------------------------------------------------------------------------------------------------------------|----------------------|----------------------------------------------------|---------------------------------------------------------------------------------------------------------------------------|-----------------------------------------------------------------------------------------------------------------------------------|-----|
|                          |                                      | Autism only: n = 295, 27% female. ADHD only: n = 280, 25% female. autism+ADHD sample: n = 113, 24% female. NESCOG control sample, Netherlands, n = 943, age range 17-79, 63% female. Both Inside-Out and NESCOG participants are Dutch. European ancestry was restricted to European. |                      |                                                    | effects), and sex as covariates                                                                                           | psychiatric classification (OR = 0.97 (95% CI 0.89 - 1.05), R <sup>2</sup> = .03, p = 0.430)                                      |     |
| Joo (2022) <sup>51</sup> | Specific psychiatric classifications | A total of 6,592 ABCD children were included in the analyses (5,374 European ancestry), mean age= 9.9 (SD = 0.6) years, 52.8% girls. Participants                                                                                                                                     | PRSice. No threshold | Suicidal ideation (passive and active: KSADS-Comp) | Sex, sample collection site, family income, maternal educational attainment, and self-reported race and ethnicity, 10 PCs | The autism polygenic score was not associated with suicidal phenotypes in a multiethnic cohort. In a European-only cohort, it was | FDR |

|                                |                                      |                                                                                                                                                                                                                                                                                                  |                                                                                                                                                                                                                                          |                                 |                                                                                                                     |                                                                                                                                                                |              |
|--------------------------------|--------------------------------------|--------------------------------------------------------------------------------------------------------------------------------------------------------------------------------------------------------------------------------------------------------------------------------------------------|------------------------------------------------------------------------------------------------------------------------------------------------------------------------------------------------------------------------------------------|---------------------------------|---------------------------------------------------------------------------------------------------------------------|----------------------------------------------------------------------------------------------------------------------------------------------------------------|--------------|
|                                |                                      | were American. Genetic ancestry was African, admixed American, East Asian, European, and other.                                                                                                                                                                                                  |                                                                                                                                                                                                                                          |                                 |                                                                                                                     | associated with active suicidal ideation (OR, 1.18; 95% CI, 1.06-1.31; P = .002, but no other suicidal phenotypes                                              |              |
| Jorgenson (2021) <sup>52</sup> | Specific psychiatric classifications | The sample consisted of 3,882 iPsych (72% males) individuals diagnosed with nocturnal enuresis (median age = 19.96, IQR = 16.71–22.87) and 31,073 controls (median age = 20.38 years, IQR = 17.13–23.21). Of the cases, 73.83% had a psychiatric diagnosis for ADHD, autism or AFD. Participants | PGS method not reported. PT < 5 × 10 <sup>-8</sup> , PT < 1 × 10 <sup>-6</sup> , PT < 1 × 10 <sup>-4</sup> , PT < 1 × 10 <sup>-3</sup> , PT < 0.01, PT < 0.05, PT < 0.1, PT < 0.2, PT < 0.5, and PT < 1. Most optimal threshold selected | Diagnosis of nocturnal enuresis | Sex ratios and the percentages of individuals with ADHD, autism spectrum disorder (autism), and affective disorders | The autism polygenic score was not significantly associated with nocturnal enuresis without comorbid autism diagnosis (OR = 1.03, 95% CI 0.99 – 1.07, p = .13) | Not reported |

|                             |                                      |                                                                                                                                                                                                                                                  |                                   |                                                                                         |                                  |                                                                                                                                                                                                 |              |
|-----------------------------|--------------------------------------|--------------------------------------------------------------------------------------------------------------------------------------------------------------------------------------------------------------------------------------------------|-----------------------------------|-----------------------------------------------------------------------------------------|----------------------------------|-------------------------------------------------------------------------------------------------------------------------------------------------------------------------------------------------|--------------|
|                             |                                      | were Danish. Genetic ancestry was restricted to European.                                                                                                                                                                                        |                                   |                                                                                         |                                  |                                                                                                                                                                                                 |              |
| Koomar (2021) <sup>53</sup> | Specific psychiatric classifications | The sample consisted of 5,157 probands (81% male, mean age = 11.1 (SD = 5.87)) and 4,985 parents (16% male, mean age = 41.63 (SD = 8.24)). Participants were American. Genetic ancestry was restricted to European for polygenic score analyses. | PRSice. P = 0.0005, 0.05, and 0.5 | ARFID score (Nine-Item Avoidant/Restrictive Food Intake Disorder (ARFID) Screen (NIAS)) | 10 PCs, phenotypes scaled by sex | The autism polygenic score was nominally positively association with total ARFID score ( $\rho = 0.058$ , FDR $p = 0.094$ ). No association with appetite factor, fear factor and picky factor. | FDR          |
| Legge (2019) <sup>54</sup>  | Specific psychiatric classifications | The sample consisted of 7,803 UKB individuals (60% female, mean age = 62.7 (SD = 7.7) that                                                                                                                                                       | PRSice, $P \leq .05$              | Psychotic experiences assessed using MHQ                                                | 5 PCs and genotyping array       | Weak association between autism polygenic score and any psychotic experience (OR,                                                                                                               | Not reported |

|                            |                                      |                                                                                                                                                                                                                                                                                                              |                                                                                                                                                                                                                |                                                                                                                  |                                     |                                                                                                                                                                                                                                                      |                              |
|----------------------------|--------------------------------------|--------------------------------------------------------------------------------------------------------------------------------------------------------------------------------------------------------------------------------------------------------------------------------------------------------------|----------------------------------------------------------------------------------------------------------------------------------------------------------------------------------------------------------------|------------------------------------------------------------------------------------------------------------------|-------------------------------------|------------------------------------------------------------------------------------------------------------------------------------------------------------------------------------------------------------------------------------------------------|------------------------------|
|                            |                                      | <p>reported at least 1 psychotic experience and 147,461 individuals who reported no psychotic experiences (56% female, mean age 64.1 (SD = 7.6). After quality control the sample consisted of 6,123 cases and 121,843 controls. Participants were British. Genetic ancestry was restricted to European.</p> |                                                                                                                                                                                                                |                                                                                                                  |                                     | <p>1.07; 95% CI, 1.04-1.10; R<sup>2</sup> = 0.001; P = 1.34 × 10<sup>-5</sup>). These associations were stronger for distressing psychotic experiences. In addition, several associations with different types of psychotic experiences reported</p> |                              |
| Legge (2021) <sup>55</sup> | Specific psychiatric classifications | <p>1,220 individuals with schizophrenia from 3 sample collections: CardiffCOGS (n = 697),<sup>20</sup> Cardiff F-series (n = 383),<sup>21</sup> and</p>                                                                                                                                                      | <p>PRSice. Primary analyses: P ≤ .05, sensitivity analyses: : 5 × 10<sup>-8</sup>, 1 × 10<sup>-7</sup>, 1 × 10<sup>-6</sup>, 1 × 10<sup>-5</sup>, 1 × 10<sup>-4</sup>, 0.001, 0.05, 0.1, 0.2, 0.5, and 1.0</p> | <p>Dimensions from factor model retrieved through confirmatory factor analysis (CFA) framework. Factor model</p> | <p>Sex, age at interview, 5 PCs</p> | <p>Autism polygenic score was not associated with factors in a 5-factor model nor a 3-factor model (p ≥ .02)</p>                                                                                                                                     | <p>Bonferroni correction</p> |

|                                 |                                                        |                                                                                                                                                                                                           |                                |                                                                                                                                                                                                                                |                                                  |                                                                                                                                                                                                            |                                                  |
|---------------------------------|--------------------------------------------------------|-----------------------------------------------------------------------------------------------------------------------------------------------------------------------------------------------------------|--------------------------------|--------------------------------------------------------------------------------------------------------------------------------------------------------------------------------------------------------------------------------|--------------------------------------------------|------------------------------------------------------------------------------------------------------------------------------------------------------------------------------------------------------------|--------------------------------------------------|
|                                 |                                                        | Cardiff Affected-Sib (n = 140). Of these, 67% was male. Participants were British. Genetic ancestry was restricted to European.                                                                           |                                | based on Scale for the Assessment of Positive Symptoms and the Scale for the Assessment of Negative Symptoms, cognition (MATRICS Consensus Cognitive Battery domain and composite scores) and IQ (National Adult Reading Test) |                                                  |                                                                                                                                                                                                            |                                                  |
| Mattheisen (2022) <sup>27</sup> | Autism diagnosis, specific psychiatric classifications | iPsych and PGC participants that were included in the ADHD and autism GWAS <sup>10,35</sup> , no further sample description. The final combined dataset comprised 34,462 cases of which 9315 with autism- | Ricopili, PLINK . Leave- P<0.5 | autism and <b>ADHD diagnosis</b>                                                                                                                                                                                               | 5 PCs, additional analyses with sex as covariate | <b>The autism polygenic score distinguished ADHD cases from controls (OR = 1.08, 95% CI = 1.06 – 1.11, p = 7.5 x 0-12),</b> autism cases from controls (OR = 1.21, 95% CI = 1.18 – 1.24, p = 1.2 x 10-48), | Bonferroni correction for 2 x 6 tests: p < .0042 |

|  |  |                                                                                                                                                                                                                                                                                           |  |  |  |                                                                                                                                                                                                                                                                                                                                                                                                                                                                                                    |  |
|--|--|-------------------------------------------------------------------------------------------------------------------------------------------------------------------------------------------------------------------------------------------------------------------------------------------|--|--|--|----------------------------------------------------------------------------------------------------------------------------------------------------------------------------------------------------------------------------------------------------------------------------------------------------------------------------------------------------------------------------------------------------------------------------------------------------------------------------------------------------|--|
|  |  | <p>only and 2304 with autism and ADHD, and 41,201 controls. iPsych samples are all Danish. PGC participants are American, Swedish, Belgian, German, Irish, Dutch, Spanish, Swiss, English, and Israeli, Canadian, Chinese and Norwegian. Genetic ancestry was restricted to European.</p> |  |  |  | <p>comorbid (ADHD+autism) cases from controls (OR = 1.22, 95% CI = 1.16 – 1.29, p = 3.5 x 10<sup>-14</sup>), comorbid cases from ADHD-only cases (OR = 1.13, 95% CI = 1.08 – 1.19, p = 4.7 x 10<sup>-7</sup>), autism-only cases from ADHD-only cases (OR = 1.12, 95% CI = 1.09 – 1.15, p = 1.2 x 10<sup>-15</sup>),) but not comorbid cases from autism-only cases (OR = 1.01, 95% CI = 0.96 – 1.6, p = 0.68), ADHD + intellectual disability from ADHD without intellectual disability (OR =</p> |  |
|--|--|-------------------------------------------------------------------------------------------------------------------------------------------------------------------------------------------------------------------------------------------------------------------------------------------|--|--|--|----------------------------------------------------------------------------------------------------------------------------------------------------------------------------------------------------------------------------------------------------------------------------------------------------------------------------------------------------------------------------------------------------------------------------------------------------------------------------------------------------|--|



|                              |                                                          |                                                                                                                                                                                                                                                                                      |                 |                                                                                                                                                                                                                                                     |                                                                           |                                                                                                                                                                                                                                                                                                   |                                                                                        |
|------------------------------|----------------------------------------------------------|--------------------------------------------------------------------------------------------------------------------------------------------------------------------------------------------------------------------------------------------------------------------------------------|-----------------|-----------------------------------------------------------------------------------------------------------------------------------------------------------------------------------------------------------------------------------------------------|---------------------------------------------------------------------------|---------------------------------------------------------------------------------------------------------------------------------------------------------------------------------------------------------------------------------------------------------------------------------------------------|----------------------------------------------------------------------------------------|
|                              |                                                          |                                                                                                                                                                                                                                                                                      |                 |                                                                                                                                                                                                                                                     |                                                                           | 0.94, 95% CI = 0.86 – 1.03, p = .19) and autism + intellectual disability from autism without intellectual disability (OR = 0.89, 95% CI = 0.81 – 0.97, p = .0072)                                                                                                                                |                                                                                        |
| Leppert (2019) <sup>56</sup> | Specific psychiatric classifications, Physical wellbeing | The sample consisted of ALSPAC mothers (100% female, mean age = 28.5, SD = 4.8). Sample size differed per outcome measures, with a maximum of 7,486 and a minimum of 2,535 depending on the outcome measure. Participants were British. Genetic ancestry was restricted to European. | PRSice. P < .05 | Prenatal factors of maternal lifestyle, maternal use of nutritional supplements and medications in pregnancy, maternal illnesses and conditions, biomarkers of nutritional status and toxin exposure in pregnancy, perinatal factors and conditions | 10 PCs, analyses of child polygenic score included 10 PCs and child's sex | <b>Maternal autism polygenic score was positively associated with severe depression (p = .01)</b> and stressful life events score in the first (p = 3 x 10 <sup>-4</sup> ) and third (p = .004) trimester of pregnancy, but no other maternal illnesses or conditions, lifestyle-related prenatal | Correction based on number of PCs that explained 80% of covariance: P < .0024 (.05/21) |

|                          |                                             |                                                                                                                                                                                                                       |                                                                                                                   |                                                                                                                                                                        |              |                                                                                                                                                                                                                                             |                                             |
|--------------------------|---------------------------------------------|-----------------------------------------------------------------------------------------------------------------------------------------------------------------------------------------------------------------------|-------------------------------------------------------------------------------------------------------------------|------------------------------------------------------------------------------------------------------------------------------------------------------------------------|--------------|---------------------------------------------------------------------------------------------------------------------------------------------------------------------------------------------------------------------------------------------|---------------------------------------------|
|                          |                                             |                                                                                                                                                                                                                       |                                                                                                                   |                                                                                                                                                                        |              | exposures ( $p \geq .09$ ), blood biomarkers ( $p \geq .24$ ), and perinatal exposures and conditions ( $p \geq .28$ ). The child's autism polygenic score was also not associated with perinatal exposures and conditions ( $p \geq .39$ ) |                                             |
| Ohi (2020) <sup>57</sup> | Specific psychiatric classifications, other | Total sample of 131 patients with schizophrenia (50 males/81 females, mean age = 42.9, SD = 13.1 years), 57 of their unaffected first-degree relatives (41 parents/12 siblings/4 offspring, 18 males/39 females, mean | Method not reported. $PT \leq .01$ , $PT \leq .05$ , $PT \leq .1$ , $PT \leq .2$ , $PT \leq .5$ , and $PT \leq 1$ | Diagnostic status of schizophrenia, divided into three statuses: diagnosed with schizophrenia, first-degree relatives of person with schizophrenia, or healthy control | Not reported | Lower age at onset of schizophrenia was significantly associated with higher autism polygenic score ( $PT \leq .05$ : $\beta = -0.20$ , $P = 7.13 \times 10^{-3}$ ). The autism polygenic scores were marginally lower in Japanese first-   | Bonferroni correction: ( $\alpha = .05/5$ ) |

|                          |                                                       |                                                                                                                                             |                                                                      |                                                           |                                                                    |                                                                                                                                                                                                                                                                                                                                                                                                 |                       |
|--------------------------|-------------------------------------------------------|---------------------------------------------------------------------------------------------------------------------------------------------|----------------------------------------------------------------------|-----------------------------------------------------------|--------------------------------------------------------------------|-------------------------------------------------------------------------------------------------------------------------------------------------------------------------------------------------------------------------------------------------------------------------------------------------------------------------------------------------------------------------------------------------|-----------------------|
|                          |                                                       | age = 59.7, SD =13.6 years), and 147 HCs (98 males/49 females, mean age = 37.2, SD =14.1 years). all participants were of Japanese descent. |                                                                      |                                                           |                                                                    | degree relatives compared with healthy controls ( maximum at $PT \leq .01$ : Nagelkerke's $R^2 = 0.045$ , $P = .013$ ) and patients with schizophrenia patients (maximum at $PT \leq 0.2$ : Nagelkerke's $R^2 = 0.023$ , $P = .084$ ), while there were no significant differences in the polygenic score for European autism between schizophrenia patients and healthy controls ( $P > .05$ ) |                       |
| Qin (2020) <sup>58</sup> | Specific psychiatric classifications, brain measures, | Total sample of 345 participants. Patients with schizophrenia (n = 121) mean age                                                            | PRSice. 103 PT (ranging from 0 to 0.5 with increments of 0.005, plus | MRI. Facial emotion recognition (Chinese Facial Affective | Age, sex, education, disease status, and the first four components | Positive correlation between the autism polygenic score                                                                                                                                                                                                                                                                                                                                         | Bonferroni correction |

|  |                     |                                                                                                                                                                                                                         |                                                            |                                          |  |                                                                                                                                                                                                                                                                                                                                                                                                                |  |
|--|---------------------|-------------------------------------------------------------------------------------------------------------------------------------------------------------------------------------------------------------------------|------------------------------------------------------------|------------------------------------------|--|----------------------------------------------------------------------------------------------------------------------------------------------------------------------------------------------------------------------------------------------------------------------------------------------------------------------------------------------------------------------------------------------------------------|--|
|  | Emotion recognition | at scan = 24.24 (SD = 9.03), 36 male. Healthy controls (n = 224) mean age at scan = 34.71 (SD = 12.69), 83 male. Of these, 116 with schizophrenia and 212 controls were taken into analyses. Participants were Chinese. | 10 <sup>-5</sup> , 10 <sup>-4</sup> , and 10 <sup>-3</sup> | Picture System). Schizophrenia diagnosis |  | and amplitude of low frequency fluctuation (ALFF) in left amygdala in the total sample of schizophrenia cases and controls (r = 0.2122, Puncorrected = 0.0002483, Pcorrected = 0.022). Negative correlation of autism polygenic score with negative emotion recognition (r = -0.2288, Puncorrected = 0.000149, Pcorrected = 0.0006). No associations with other brain regions nor types of emotion recognition |  |
|--|---------------------|-------------------------------------------------------------------------------------------------------------------------------------------------------------------------------------------------------------------------|------------------------------------------------------------|------------------------------------------|--|----------------------------------------------------------------------------------------------------------------------------------------------------------------------------------------------------------------------------------------------------------------------------------------------------------------------------------------------------------------------------------------------------------------|--|

|                             |                                                       |                                                                                                                                                                                                                                                              |                    |                                                                                                                                                      |              |                                                                                                                                                                              |              |
|-----------------------------|-------------------------------------------------------|--------------------------------------------------------------------------------------------------------------------------------------------------------------------------------------------------------------------------------------------------------------|--------------------|------------------------------------------------------------------------------------------------------------------------------------------------------|--------------|------------------------------------------------------------------------------------------------------------------------------------------------------------------------------|--------------|
|                             |                                                       |                                                                                                                                                                                                                                                              |                    |                                                                                                                                                      |              | were found. <b>No significant associations were observed between the autism polygenic score and schizophrenia at different p value thresholds (<math>p \geq .368</math>)</b> |              |
| Riglin (2021) <sup>42</sup> | Autistic traits, specific psychiatric classifications | ALSPAC includes a total of 14,901 participants, of which about 50% is female. Polygenic scores were derived for 9,912 children. Detailed information about the participants that were included in this study specifically was not reported. All participants | PRSice. $P < 0.05$ | ADHD and autism symptoms. Parent-rated at 11/12 and 25 years of age (ADHD: SDQ, autism: SCDC). Self-rated at 25 years of age (ADHD: SDQ, autism: AQ) | Not reported | <b>The autism polygenic score does not significantly associate with parent- and self-reported ADHD and autism symptoms (<math>\geq .01</math>)</b>                           | Not reported |

|                              |                                      |                                                                                                                                                                                                                                                                                       |                                                                                                                                                                                             |                                            |              |                                                                                                                                                                             |              |
|------------------------------|--------------------------------------|---------------------------------------------------------------------------------------------------------------------------------------------------------------------------------------------------------------------------------------------------------------------------------------|---------------------------------------------------------------------------------------------------------------------------------------------------------------------------------------------|--------------------------------------------|--------------|-----------------------------------------------------------------------------------------------------------------------------------------------------------------------------|--------------|
|                              |                                      | were British. Genetic ancestry was restricted to European.                                                                                                                                                                                                                            |                                                                                                                                                                                             |                                            |              |                                                                                                                                                                             |              |
| Russell (2021) <sup>59</sup> | Specific psychiatric classifications | ALSPAC includes a total of 14,901 participants, of which about 50% is female. The sample for the polygenic score analyses consisted of 4,959. Participants received questionnaires at ages 16, 21 and 24. All participants were British. Genetic ancestry was restricted to European. | Plink. $5 \times 10^{-8}$ , $1 \times 10^{-7}$ , $1 \times 10^{-6}$ , $1 \times 10^{-5}$ , $1 \times 10^{-4}$ , 0.001, 0.01, 0.05, 0.1, 0.2, 0.3, 0.4, 0.5. Most optimal threshold selected | Non suicidal self-harm and suicide attempt | Not reported | The autism polygenic score was significantly associated with non-suicidal self-harm (RR = 1.09, 95% CI 1.01 – 1.18) but not suicide attempt (RR = 0.98, 95% CI 0.98 – 1.20) | Not reported |

|                            |                                                                            |                                                                                                                                                                                                                                                                                                                                                                        |                                                                                                                                                                                                      |                                                                                                                                         |                                                |                                                                                                                                                                                                                                                                                                                                                               |     |
|----------------------------|----------------------------------------------------------------------------|------------------------------------------------------------------------------------------------------------------------------------------------------------------------------------------------------------------------------------------------------------------------------------------------------------------------------------------------------------------------|------------------------------------------------------------------------------------------------------------------------------------------------------------------------------------------------------|-----------------------------------------------------------------------------------------------------------------------------------------|------------------------------------------------|---------------------------------------------------------------------------------------------------------------------------------------------------------------------------------------------------------------------------------------------------------------------------------------------------------------------------------------------------------------|-----|
| Zhang (2022) <sup>37</sup> | Autism diagnosis, specific psychiatric classifications, physical wellbeing | The sample consisted of 3189 ANGI individuals diagnosed with an eating disorder, 134 of whom were also diagnosed with autism. Of the individuals without autism, 1.9% was male and mean birth year was 1988.77 (5.54). Of the individuals with autism, 5.2% was male and mean birth year was 1989.04. All participants were Swedish. Genetic ancestry is not reported. | Plink. First principal components for polygenic scores built from 10 thresholds (p-values: 5 x 10 <sup>-8</sup> , 1 x 10 <sup>-6</sup> , 1 x 10 <sup>-4</sup> , 0.001, 0.01, 0.05, 0.1, 0.2, 0.5, 1) | <b>Eating disorder severity and persistence, eating disorder treatment, suicidal behaviour and self-harm.</b> Autism diagnostic status. | Sex and birth year in 3 year intervals, 10 PCs | <b>The autism polygenic score was not statistically significantly associated with any ED severity, persistence, and treatment outcomes nor suicidal behaviour and self-harm (OR range: 0.79–1.02, <math>\beta</math> range: –0.34–0.03, IRR range: 0.82–1.06).</b> Autism polygenic score was not associated with autism diagnostic status ( $R^2 = 0.0182$ ) | FDR |
| General psychopathology    |                                                                            |                                                                                                                                                                                                                                                                                                                                                                        |                                                                                                                                                                                                      |                                                                                                                                         |                                                |                                                                                                                                                                                                                                                                                                                                                               |     |
| Gui (2022) <sup>60</sup>   | Brain measures, general psychopathology, cognition and                     | The ABCD sample consisted of 4722 (2198 female, mean                                                                                                                                                                                                                                                                                                                   | Plink, Bayesian approach, no threshold needed                                                                                                                                                        | Cognitive measures: ABCD: NIH toolbox (consisting of 7                                                                                  | Age, sex, 10 PCs                               | Cognitive measures: Autism polygenic score was not                                                                                                                                                                                                                                                                                                            | FDR |

|  |                    |                                                                                                                                                                                                                                                                                                               |  |                                                                                                                                                                                                                                                                                      |  |                                                                                                                                                                                                                                                                                                                                                                                                                                                  |  |
|--|--------------------|---------------------------------------------------------------------------------------------------------------------------------------------------------------------------------------------------------------------------------------------------------------------------------------------------------------|--|--------------------------------------------------------------------------------------------------------------------------------------------------------------------------------------------------------------------------------------------------------------------------------------|--|--------------------------------------------------------------------------------------------------------------------------------------------------------------------------------------------------------------------------------------------------------------------------------------------------------------------------------------------------------------------------------------------------------------------------------------------------|--|
|  | executive function | age = 9.91, SD = 0.62). The UKB sample for intelligence scores consisted of 147175 participants (78561 female, mean age = 57.9, SD =8.23) and 21523 (11180 female, mean age = 63.84, SD =7.47). ABCD participants are American and UKB participants are British. Genetic ancestry was restricted to European. |  | tasks and 3 composite scores). UKB: fluid intelligence scores.<br><br><b>Behavior: ABCD: CBCL subscales.</b><br><br>Brain imaging: ABCD: morphometric measures (cortical thickness, sulcal depth, are and subcortical volume), diffusion tensor imaging (DTI) and resting-state fMRI |  | associated with cognitive measures in ABCD ( $p \geq .804$ ). autism polygenic score was significantly positively associated with fluid intelligence in UKB ( $R^2 = 8,66E-04$ , $p = 5,47E-06$ ), and females showed significantly stronger associations than males ( $p < 2.20 \times 10^{-16}$ , $r = 0.87$ ). Behavior: <b>The autism polygenic score was significantly positively associated with half of the psychiatric behaviors (10</b> |  |
|--|--------------------|---------------------------------------------------------------------------------------------------------------------------------------------------------------------------------------------------------------------------------------------------------------------------------------------------------------|--|--------------------------------------------------------------------------------------------------------------------------------------------------------------------------------------------------------------------------------------------------------------------------------------|--|--------------------------------------------------------------------------------------------------------------------------------------------------------------------------------------------------------------------------------------------------------------------------------------------------------------------------------------------------------------------------------------------------------------------------------------------------|--|



|                               |                                                           |                                                                                                                                                                                                                     |                                                                                                     |                                                                                                                                                                                  |                                                                                                                       |                                                                                                                                                                                                                                               |     |
|-------------------------------|-----------------------------------------------------------|---------------------------------------------------------------------------------------------------------------------------------------------------------------------------------------------------------------------|-----------------------------------------------------------------------------------------------------|----------------------------------------------------------------------------------------------------------------------------------------------------------------------------------|-----------------------------------------------------------------------------------------------------------------------|-----------------------------------------------------------------------------------------------------------------------------------------------------------------------------------------------------------------------------------------------|-----|
|                               |                                                           |                                                                                                                                                                                                                     |                                                                                                     |                                                                                                                                                                                  |                                                                                                                       | <p><b>out of 20, the strongest association with CBCL b.</b></p> <p>Brain imaging: autism polygenic score did not have significant effects on cortical and subcortical structures and resting state fMRI functions in ABCD nor IDPs in UKB</p> |     |
| Loughnan (2022) <sup>61</sup> | General psychopathology, cognition and executive function | Main analyses were performed on a sample of 5,204 children of European ancestry (mean age in months = 119.18 (7.48), 52.7% male). Supplementary analyses were performed on n = 3,964 of non-European ancestry (mean | PRSice. no p-value threshold + comparison to p-value thresholds 0.01, 0.05, 0.1, 0.2, 0.3, 0.4, 0.5 | Diagnostic assessment: KSADS.<br><br>Dimensional assessments: CBCL, general behaviour inventory, prosocial behavior survey, PQ-B, UPPS-P for children short scale, BISBAS scale, | Age, sex, top 10 genetic principal components, household income, highest parental education, and data collection site | The autism polygenic score associated with youth-reported KSADS depression symptoms ( $\Delta R^2=0.0024$ , $p$ -adj = $3.9 \times 10^{-3}$ ), suicidality symptoms ( $\Delta R^2=0.0013$ , $p$ -adj = $4.0 \times 10^{-2}$ )                 | FDR |

|  |  |                                                                                                                                                                 |  |                                      |  |                                                                                                                                                                                                                                                                                                                                                                                                                                                                                                                                                                 |  |
|--|--|-----------------------------------------------------------------------------------------------------------------------------------------------------------------|--|--------------------------------------|--|-----------------------------------------------------------------------------------------------------------------------------------------------------------------------------------------------------------------------------------------------------------------------------------------------------------------------------------------------------------------------------------------------------------------------------------------------------------------------------------------------------------------------------------------------------------------|--|
|  |  | <p>age in months = 118.86 (7.46), 51.6% male) and on the full sample n = 9168 (mean age in months = 119.04 (7.47), 52.2% male). Participants were American.</p> |  | <p>NIH toolbox cognition battery</p> |  | <p>), and ADHD symptoms (<math>\Delta R^2=0.0014</math>, <math>p</math>-adj = <math>3.7 \times 10^{-2}</math>), as well as CBCL inattention (<math>\Delta R^2=0.0016</math>, <math>p</math>-adj = <math>1.0 \times 10^{-2}</math>), crystallized composite score from the NIH Toolbox (<math>\Delta R^2=0.0014</math>, <math>p</math>-adj = <math>3.6 \times 10^{-2}</math>). No associations were reported with other scales. Only the association with crystallized composite score from the NIH Toolbox® remained significant in multivariable analyses.</p> |  |
|--|--|-----------------------------------------------------------------------------------------------------------------------------------------------------------------|--|--------------------------------------|--|-----------------------------------------------------------------------------------------------------------------------------------------------------------------------------------------------------------------------------------------------------------------------------------------------------------------------------------------------------------------------------------------------------------------------------------------------------------------------------------------------------------------------------------------------------------------|--|

|                          |                         |                                                                                                                                                                                                                                                                                             |                                                                                                     |                                                                                          |               |                                                                                                                                                      |     |
|--------------------------|-------------------------|---------------------------------------------------------------------------------------------------------------------------------------------------------------------------------------------------------------------------------------------------------------------------------------------|-----------------------------------------------------------------------------------------------------|------------------------------------------------------------------------------------------|---------------|------------------------------------------------------------------------------------------------------------------------------------------------------|-----|
| Pat (2021) <sup>62</sup> | General psychopathology | The sample for the primary analysis included 4,814 ABCD children (2,263 girls; mean age = 9.94, SD =0.61 years) of European ancestry. Supplementary analyses were performed on 1,460 children of African ancestry (726 girls; mean age = 9.94, SD =0.60 years). Participants were American. | Plink. Main analysis: $p < .05$ , supplementary analyses: other thresholds from $p < .5$ to $.0001$ | P factor and 5 specific dimensions constructed from CBCL by confirmatory factor analysis | 4 PCs and sex | The autism polygenic score was not associated with the p factor in children of European descent ( $r = 0.018$ ) nor African ancestry ( $r = -.011$ ) | FDR |
|--------------------------|-------------------------|---------------------------------------------------------------------------------------------------------------------------------------------------------------------------------------------------------------------------------------------------------------------------------------------|-----------------------------------------------------------------------------------------------------|------------------------------------------------------------------------------------------|---------------|------------------------------------------------------------------------------------------------------------------------------------------------------|-----|

|                             |                         |                                                                                                                                                                                                                                                                           |                    |                                                                                                                                                                                                                                                                                                                                                                       |               |                                                                                                                                                                                                                               |              |
|-----------------------------|-------------------------|---------------------------------------------------------------------------------------------------------------------------------------------------------------------------------------------------------------------------------------------------------------------------|--------------------|-----------------------------------------------------------------------------------------------------------------------------------------------------------------------------------------------------------------------------------------------------------------------------------------------------------------------------------------------------------------------|---------------|-------------------------------------------------------------------------------------------------------------------------------------------------------------------------------------------------------------------------------|--------------|
| Riglin (2020) <sup>63</sup> | General psychopathology | ALSPAC includes a total of 14,901 participants, of which about 50% is female. Polygenic score analyses were performed on 5,518 participants. Questionnaires were administered at ages 7/8 and 13. Participants were British. Genetic ancestry was restricted to European. | PRSice. $p < 0.05$ | Parent-reported psychopathology, behavioral problems, neurodevelopmental problems: DAWBA. Social communication problems: SCDC, all at age 7/8 and 13. Confirmatory factor analysis was performed and revealed a bifactor model including a general psychopathology factor “p” as well as three ‘specific’ “emotional”, “behavioural” and “neurodevelopmental” factors | Not described | The autism polygenic score was not associated with general psychopathology assessed by factor therapy at age 7 and age 13, nor with specific factors (emotional, behavioral, and neurodevelopmental problems), $p \geq 0.313$ | Not reported |
|-----------------------------|-------------------------|---------------------------------------------------------------------------------------------------------------------------------------------------------------------------------------------------------------------------------------------------------------------------|--------------------|-----------------------------------------------------------------------------------------------------------------------------------------------------------------------------------------------------------------------------------------------------------------------------------------------------------------------------------------------------------------------|---------------|-------------------------------------------------------------------------------------------------------------------------------------------------------------------------------------------------------------------------------|--------------|

|                             |                         |                                                                                                                                                                                                                                                                                                                                                                                                                                  |                                                       |                                                                                                                                                                                                         |                  |                                                                                                                                                                                                                                                                                                                                                                                                                                                     |                               |
|-----------------------------|-------------------------|----------------------------------------------------------------------------------------------------------------------------------------------------------------------------------------------------------------------------------------------------------------------------------------------------------------------------------------------------------------------------------------------------------------------------------|-------------------------------------------------------|---------------------------------------------------------------------------------------------------------------------------------------------------------------------------------------------------------|------------------|-----------------------------------------------------------------------------------------------------------------------------------------------------------------------------------------------------------------------------------------------------------------------------------------------------------------------------------------------------------------------------------------------------------------------------------------------------|-------------------------------|
| Schlag (2022) <sup>64</sup> | General psychopathology | ALSPAC includes a total of 14,901 participants, of which about 50% is female. Participants were 4, 7, 8, 9, 10, 11, 12, 13 or 17 years old depending on the outcome measure. For the ALSPAC sample, sample sizes ranged from 3,686 to 6,570 depending on outcome measure and age. For the TEDS sample, sample sizes ranged from 2,825 to 7,112. Participants were British or Welsh. Genetic ancestry was restricted to European. | Plink and PRS-CS. nine thresholds $0.001 \leq PT < 1$ | ALSPAC: Parent-reported low prosociality (ages 7, 10, 12, 13, 17) and peer problems (ages 7, 10, 12, 13, 17) (SDQ), teacher-reported low prosociality (ages 8, 11) and peer problems (ages 8, 11) (SDQ) | Sex, age, 10 PCs | In the ALSPAC sample, the autism polygenic score was associated with parent-reported low prosociality at age 7 (strongest association at GWAS p threshold .7, $b = .0468$ , $p = .00044$ ), but no associations at different ages or p value thresholds were reported. In the TEDS sample, autism polygenic score was associated with parent-reported low prosociality at age 11 (strongest association at GWAS p threshold .9, $b = .0551$ , $p =$ | Matric Spectral Decomposition |
|-----------------------------|-------------------------|----------------------------------------------------------------------------------------------------------------------------------------------------------------------------------------------------------------------------------------------------------------------------------------------------------------------------------------------------------------------------------------------------------------------------------|-------------------------------------------------------|---------------------------------------------------------------------------------------------------------------------------------------------------------------------------------------------------------|------------------|-----------------------------------------------------------------------------------------------------------------------------------------------------------------------------------------------------------------------------------------------------------------------------------------------------------------------------------------------------------------------------------------------------------------------------------------------------|-------------------------------|

|                             |                                          |                                                                                                                                                                                                                                     |                                        |                                                                                                                              |                                      |                                                                                                                                                                                                                                           |     |
|-----------------------------|------------------------------------------|-------------------------------------------------------------------------------------------------------------------------------------------------------------------------------------------------------------------------------------|----------------------------------------|------------------------------------------------------------------------------------------------------------------------------|--------------------------------------|-------------------------------------------------------------------------------------------------------------------------------------------------------------------------------------------------------------------------------------------|-----|
|                             |                                          |                                                                                                                                                                                                                                     |                                        |                                                                                                                              |                                      | .000272) and teacher reported low prosociality at age 7 (strongest association at GWAS p thresholds .9, b = .0368, p = .00146), but no associations at different ages or p value thresholds were reported.                                |     |
| Thomas (2022) <sup>46</sup> | Autistic traits, general psychopathology | For the SPARK cohort, 6,064 participants were included, 1,177 of whom were female, mean age 5 (SD =2.7). For the ABCD cohort, 5,285 participants were included, of whom 2,459 were female. Mean age was 9.9 (SD = 0.6) Participants | LDpred.No threshold, bayesian approach | SPARK: <b>Clinical autism scales DCDQ, RBS-R, SCQ,</b> secondary phenotypes CBCL syndrome scales. ABCD: CBCL syndrome scales | Phenotypes residualized for age, sex | The autism polygenic score only had a slight positive association with DCDQ movement $\beta = 0.03$ and a slight negative association with RBS-R compulsive $\beta = -0.03$ , neither of which was significant after FDR. <b>No other</b> | FDR |

|                                  |                         |                                                                                                                                                                                                   |                                                                                         |                                                                                                                                                                                                                                                  |        |                                                                                                                                                                                                                                                                                                                                                      |     |
|----------------------------------|-------------------------|---------------------------------------------------------------------------------------------------------------------------------------------------------------------------------------------------|-----------------------------------------------------------------------------------------|--------------------------------------------------------------------------------------------------------------------------------------------------------------------------------------------------------------------------------------------------|--------|------------------------------------------------------------------------------------------------------------------------------------------------------------------------------------------------------------------------------------------------------------------------------------------------------------------------------------------------------|-----|
|                                  |                         | were American. Genetic ancestry was restricted to European.                                                                                                                                       |                                                                                         |                                                                                                                                                                                                                                                  |        | <b>associations were reported</b>                                                                                                                                                                                                                                                                                                                    |     |
| Waszczuk (2021) <sup>65</sup>    | General psychopathology | The sample consisted of 4,717 children (mean age = 9.92 years (S.D. = 0.62, range = 9.00–10.92 years old) of which 47.1% female. Participants were American. Ancestry was restricted to European. | PRSice. Primary p-value threshold = 1, secondary thresholds: 0.01, 0.05, 0.10, and 0.50 | Childhood pathology (CBCL). This study uses a formerly established factor structure based on the CBCL, with a general factor (p factor) and 5 lower level factors (externalizing, internalizing, neurodevelopmental, somatoform, and detachment) | 10 PCs | The autism polygenic score was significantly associated with the general factor ( $r = .052$ ), and the lower level factors externalizing ( $r = .035$ ), neurodevelopmental ( $r = .057$ ) and detachment ( $r = .057$ ). Associations with lower level factors did not remain significant after adjusting for the general factor ( $r \leq .033$ ) | FDR |
| Cognition and executive function |                         |                                                                                                                                                                                                   |                                                                                         |                                                                                                                                                                                                                                                  |        |                                                                                                                                                                                                                                                                                                                                                      |     |

|                                       |                                  |                                                                                                                                                                                                                                                                                         |                                                                                                                                   |                                                                                                                                                                      |                    |                                                                                                                        |                                                                                                                                |
|---------------------------------------|----------------------------------|-----------------------------------------------------------------------------------------------------------------------------------------------------------------------------------------------------------------------------------------------------------------------------------------|-----------------------------------------------------------------------------------------------------------------------------------|----------------------------------------------------------------------------------------------------------------------------------------------------------------------|--------------------|------------------------------------------------------------------------------------------------------------------------|--------------------------------------------------------------------------------------------------------------------------------|
| Aguilar-Lacasana (2021) <sup>66</sup> | Cognition and executive function | The sample included 1667 BREATHE children (verbal working memory n= 1504, numerical working memory n= 1490, standard error of hit reaction time n = 1487). Of these, 46.9% was female, mean age 8.5 (SD = 0.9). Participants were Spanish. Genetic ancestry was restricted to European. | PRSice. PT = {0.01, 0.05, 0.1, 0.5, 1}                                                                                            | Verbal and numerical working memory (n back test) and attention performance (ANT). Outcome measure for attention performance is the hit reaction time standard error | Age, sex and 4 PCs | The autism polygenic score was not significantly associated with working memory measures nor attention performance     | FDR                                                                                                                            |
| Chang (2020) <sup>67</sup>            | Cognition and executive function | The number of participants differed depending on outcome variables, with a maximum of 1,145 for working memory and a                                                                                                                                                                    | Polygenic scores calculated for P-value thresholds between 0 to 0.5, increasing by 0.00005. Most significant association reported | Inhibitory control (Stroop test), cognitive flexibility (trail-making test), working memory (digit span test), ADHD symptoms                                         | Sex, IQ and 2 PCs  | The autism polygenic score was not significantly associated with an overall executive function measure (p = 5.805E-02, | P-value for the linear regression was adjusted by using 10,000 label-swapping. Adjusted P < 0.05 was considered as significant |



|  |  |                                                                                                                                                                               |  |                                                                                                                   |  |                                                                                                                                                                                                                                                                                                                                         |  |
|--|--|-------------------------------------------------------------------------------------------------------------------------------------------------------------------------------|--|-------------------------------------------------------------------------------------------------------------------|--|-----------------------------------------------------------------------------------------------------------------------------------------------------------------------------------------------------------------------------------------------------------------------------------------------------------------------------------------|--|
|  |  | <p>minimum of 913 for cognitive flexibility. Of these, 83.2% were boys. Participants were aged between 6 and 17 years (mean = 10.1, SD = 2.6). Participants were Chinese.</p> |  | <p>(Clinical Diagnostic Interview Scale). Total executive function based on principle component of all tests.</p> |  | <p>adjusted p = 0.4432) nor individual executive function components (<math>p \leq 1.461E-03</math>, adjusted <math>p \leq 0.0616</math>). The autism polygenic score was significantly associated with ADHD symptoms (P-value = <math>2.549E-03</math>, adjust P = 0.038, <math>r^2 = 0.765\%</math>, beta = 0.2618 (se = 0.0866))</p> |  |
|--|--|-------------------------------------------------------------------------------------------------------------------------------------------------------------------------------|--|-------------------------------------------------------------------------------------------------------------------|--|-----------------------------------------------------------------------------------------------------------------------------------------------------------------------------------------------------------------------------------------------------------------------------------------------------------------------------------------|--|

|                             |                                         |                                                                                                                                                                                                                                                                                                           |                                         |                                                       |                                           |                                                                                                                                                                                                      |                       |
|-----------------------------|-----------------------------------------|-----------------------------------------------------------------------------------------------------------------------------------------------------------------------------------------------------------------------------------------------------------------------------------------------------------|-----------------------------------------|-------------------------------------------------------|-------------------------------------------|------------------------------------------------------------------------------------------------------------------------------------------------------------------------------------------------------|-----------------------|
| Cullen (2021) <sup>68</sup> | Cognition and executive function, other | The sample included 4,934 individuals. Of these, 1,858 were from monozygotic twin pairs and 3,076 were from dizygotic twin pairs (1,596 same-sex pairs and 1480 opposite-sex pairs). Participants were born between 1994 and 1996 and were British or Welsh. Genetic ancestry was restricted to European. | LDpred. No threshold, Bayesian approach | Gestational age at birth and cognition at four (PARCA | 5 PCs, genotype chip, plate, sex, and SES | The autism polygenic score was not significantly associated with gestational age at birth ( $b = -.012$ , $SE = .014$ , $p = .384$ ) or cognition at age 4 ( $b = .007$ , $SE = .014$ , $p = .614$ ) | Bonferroni correction |
|-----------------------------|-----------------------------------------|-----------------------------------------------------------------------------------------------------------------------------------------------------------------------------------------------------------------------------------------------------------------------------------------------------------|-----------------------------------------|-------------------------------------------------------|-------------------------------------------|------------------------------------------------------------------------------------------------------------------------------------------------------------------------------------------------------|-----------------------|

|                          |                                                                           |                                                                                                                                                                                                                                                                                                                                                                        |                                               |                                                                                                                                                                                                                                                                                                                                                                          |                  |                                                                                                                                                                                                                                                                                                                                                                                                                                |     |
|--------------------------|---------------------------------------------------------------------------|------------------------------------------------------------------------------------------------------------------------------------------------------------------------------------------------------------------------------------------------------------------------------------------------------------------------------------------------------------------------|-----------------------------------------------|--------------------------------------------------------------------------------------------------------------------------------------------------------------------------------------------------------------------------------------------------------------------------------------------------------------------------------------------------------------------------|------------------|--------------------------------------------------------------------------------------------------------------------------------------------------------------------------------------------------------------------------------------------------------------------------------------------------------------------------------------------------------------------------------------------------------------------------------|-----|
| Gui (2022) <sup>60</sup> | Brain measures, general psychopathology, cognition and executive function | The ABCD sample consisted of 4,722 (2198 female, mean age = 9.91, SD = 0.62). The UKB sample for intelligence scores consisted of 147,175 participants (78,561 female, mean age = 57.9, SD =8.23) and 21523 (11,180 female, mean age = 63.84, SD =7.47). ABCD participants are American and UKB participants are British. Genetic ancestry was restricted to European. | Plink, Bayesian approach, no threshold needed | <p><b>Cognitive measures:</b><br/> <b>ABCD: NIH toolbox (consisting of 7 tasks and 3 composite scores). UKB: fluid intelligence scores.</b></p> <p>Behavior:<br/> ABCD: CBCL subscales.</p> <p>Brain imaging:<br/> ABCD: morphometric measures (cortical thickness, sulcal depth, are and subcortical volume), diffusion tensor imaging (DTI) and resting-state fMRI</p> | Age, sex, 10 PCs | <p><b>Cognitive measures:</b><br/> <b>Autism polygenic score was not associated with cognitive measures in ABCD (p ≥ .804). autism polygenic score was significantly positively associated with fluid intelligence in UKB (R2 = 8,66E-04, p = 5,47E-06), and females showed stronger associations than males (p &lt; 2.20 × 10<sup>-16</sup>, r = 0.87).</b></p> <p>Behavior: The autism polygenic score was significantly</p> | FDR |
|--------------------------|---------------------------------------------------------------------------|------------------------------------------------------------------------------------------------------------------------------------------------------------------------------------------------------------------------------------------------------------------------------------------------------------------------------------------------------------------------|-----------------------------------------------|--------------------------------------------------------------------------------------------------------------------------------------------------------------------------------------------------------------------------------------------------------------------------------------------------------------------------------------------------------------------------|------------------|--------------------------------------------------------------------------------------------------------------------------------------------------------------------------------------------------------------------------------------------------------------------------------------------------------------------------------------------------------------------------------------------------------------------------------|-----|

|                             |                                  |                                                                                                                                                       |                               |                                                                                                                                          |                   |                                                                                                                                                                                                                                                                                           |              |
|-----------------------------|----------------------------------|-------------------------------------------------------------------------------------------------------------------------------------------------------|-------------------------------|------------------------------------------------------------------------------------------------------------------------------------------|-------------------|-------------------------------------------------------------------------------------------------------------------------------------------------------------------------------------------------------------------------------------------------------------------------------------------|--------------|
|                             |                                  |                                                                                                                                                       |                               |                                                                                                                                          |                   | positively associated with half of the psychiatric behaviors (10 out of 20, the strongest association with CBCL b. Brain imaging: autism polygenic score did not have significant effects on cortical and subcortical structures and resting state fMRI functions in ABCD nor IDPs in UKB |              |
| Hughes (2021) <sup>69</sup> | Cognition and executive function | ALSPAC includes a total of 14,901 participants, of which about 50% is female. A total of 6,113 participants were included in this study (49.99% male, | Plink. $p < 5 \times 10^{-7}$ | Educational attainment at end of year 11 (General Certificate of Secondary Education (GCSE) and school absence (National Pupil Database) | Gender and 20 PCs | Autism polygenic score was not significantly associated with educational attainment ( $B = -1.78$ , 95% CI = $-3.84 = 0.28$ ) nor absences (% increase per SD                                                                                                                             | Not reported |

|                               |                                                           |                                                                                                                                                                                                                                                                                                                                     |                                                                                                     |                                                                                                                                                                                                                |                                                                                                                       |                                                                                                                                                                                                                                                                                                                                             |     |
|-------------------------------|-----------------------------------------------------------|-------------------------------------------------------------------------------------------------------------------------------------------------------------------------------------------------------------------------------------------------------------------------------------------------------------------------------------|-----------------------------------------------------------------------------------------------------|----------------------------------------------------------------------------------------------------------------------------------------------------------------------------------------------------------------|-----------------------------------------------------------------------------------------------------------------------|---------------------------------------------------------------------------------------------------------------------------------------------------------------------------------------------------------------------------------------------------------------------------------------------------------------------------------------------|-----|
|                               |                                                           | maternal age mean = 28.27, SD = 4.68, range 15 - 44.1). Participants were British. Genetic ancestry was restricted to European.                                                                                                                                                                                                     |                                                                                                     |                                                                                                                                                                                                                |                                                                                                                       | increase in polygenic score = -0.41, 95% CI = -2.43 – 1.65)                                                                                                                                                                                                                                                                                 |     |
| Loughnan (2022) <sup>61</sup> | General psychopathology, cognition and executive function | Main analyses were performed on a sample of 5,204 children of European ancestry (mean age in months = 119.18 (7.48), 52.7% male). Supplementary analyses were performed on n = 3,964 of non-European ancestry (mean age in months = 118.86 (7.46), 51.6% male) and on the full sample n = 9168 (mean age in months = 119.04 (7.47), | PRSice. No p-value threshold + comparison to p-value thresholds 0.01, 0.05, 0.1, 0.2, 0.3, 0.4, 0.5 | Diagnostic assessment: KSADS.<br><br>Dimensional assessments: CBCL, general behaviour inventory, prosocial behavior survey, PQ-B, UPPS-P for children short scale, BISBAS scale, NIH toolbox cognition battery | Age, sex, top 10 genetic principal components, household income, highest parental education, and data collection site | <b>The autism polygenic score associated with</b> youth-reported KSADS depression symptoms ( $\Delta R^2=0.0024$ , p - adj = $3.9 \times 10^{-3}$ ), suicidality symptoms ( $\Delta R^2=0.0013$ , p - adj = $4.0 \times 10^{-2}$ ), and ADHD symptoms ( $\Delta R^2=0.0014$ , p - adj = $3.7 \times 10^{-2}$ ), as well as CBCL inattention | FDR |

|                            |                                  |                                                                                                                 |                                                                                                     |                                                            |                               |                                                                                                                                                                                                                                                                                                                                                                      |                |
|----------------------------|----------------------------------|-----------------------------------------------------------------------------------------------------------------|-----------------------------------------------------------------------------------------------------|------------------------------------------------------------|-------------------------------|----------------------------------------------------------------------------------------------------------------------------------------------------------------------------------------------------------------------------------------------------------------------------------------------------------------------------------------------------------------------|----------------|
|                            |                                  | 52.2% male).<br>Participants were American.                                                                     |                                                                                                     |                                                            |                               | ( $\Delta R^2=0.0016$ , $p$ -<br>adj = $1.0 \times 10^{-2}$ ), <b>crystallized composite score from the NIH Toolbox</b> ( $\Delta R^2=0.0014$ , $p$ -<br>adj = $3.6 \times 10^{-2}$ ). No associations were reported with other scales. Only the association with crystallized composite score from the NIH Toolbox® remained significant in multivariable analyses. |                |
| Price (2020) <sup>70</sup> | Cognition and executive function | The sample consisted of 624 participants of the Toronto cohort (453 probands, 171 siblings, mean age = 9.83, SD | PRSice. varying P-value thresholds (eg, $P \leq .01, .02, .03, .04, .1, .2, .3, .4, .5, \dots, 1$ ) | Word reading (WISC-III) or Fourth edition Reading subtest) | Statistically significant PCs | The autism polygenic score was not significantly associated with word reading in a Toronto sample ( $b = .72$ ,                                                                                                                                                                                                                                                      | .05/7 = .00714 |

|                             |                                                          |                                                                                                                                                                                                                           |                |                                                                                                                                                              |                                              |                                                                                                                                                                                                                  |               |
|-----------------------------|----------------------------------------------------------|---------------------------------------------------------------------------------------------------------------------------------------------------------------------------------------------------------------------------|----------------|--------------------------------------------------------------------------------------------------------------------------------------------------------------|----------------------------------------------|------------------------------------------------------------------------------------------------------------------------------------------------------------------------------------------------------------------|---------------|
|                             |                                                          | = 2.53, 40.98% female) and 4629 PNC participants (4494 probands, 135 siblings, mean age 13.76, SD = 3.63, 49.43% females). Participants were American or Canadian. Genetic ancestry was restricted to European-Caucasian. |                |                                                                                                                                                              |                                              | R <sup>2</sup> = 6.82 x 10 <sup>-3</sup> , p = 2.36 x 10 <sup>-1</sup> ) nor the Philadelphia Neurodevelopmental Cohort (b = .03, R <sup>2</sup> = 2.05 x 10 <sup>-2</sup> , p = 6,58 x 10 <sup>-2</sup> )       |               |
| Torske (2019) <sup>47</sup> | Autistic traits, Cognition and executive function, other | The sample consisted of 176 BUPGEN children, adolescents, and young adults who were referred to a specialized hospital unit for NDs for evaluation of autism (76.1% boys, mean age = 11.7, SD =                           | Plink. P = 0.1 | Social function (SRS), <b>executive function (Behavior rating inventory of executive function (BRIEFF)), including subscales (Behavior Regulation Index,</b> | Age, sex, SRS scores, full-scale IQ, and PCs | The autism polygenic score differentiated between the typically developing children (TDC) and the clinical group (autism and subthreshold autism group, n = 176; t(203) = 2.61, 95% CI [1.2 × 10 <sup>-5</sup> , | No correction |

|  |  |                                                                                |  |                                                                                     |  |                                                                                                                                                                                                                                                                                                                                                                                                                                                                                                                                                                                                                                                                                  |
|--|--|--------------------------------------------------------------------------------|--|-------------------------------------------------------------------------------------|--|----------------------------------------------------------------------------------------------------------------------------------------------------------------------------------------------------------------------------------------------------------------------------------------------------------------------------------------------------------------------------------------------------------------------------------------------------------------------------------------------------------------------------------------------------------------------------------------------------------------------------------------------------------------------------------|
|  |  | 3.7. Participants were Norwegian. Genetic ancestry was restricted to European. |  | <b>Metacognition Index, Global Executive Composite), parental educational level</b> |  | <p><math>8.7 \times 10^{-5}</math> ], <math>P = 0.010</math>. The polygenic score for autism also differentiated between the TDC and both the subthreshold autism group; <math>t(83) = -2.07</math>, 95% CI [<math>-8.6 \times 10^{-5}</math> , <math>-1.7 \times 10^{-6}</math> ], <math>P = 0.042</math> and the autism group <math>t(147) = -2.63</math>, 95% CI [<math>-9.1 \times 10^{-5}</math> , <math>-1.3 \times 10^{-5}</math> ], <math>P = 0.009</math>. There was a significant group difference between total SRS scores of the Low and the High INT PGS groups; total t-score <math>t = 66.0</math> in the Low PGS group and <math>t = 76.2</math> in the High</p> |
|--|--|--------------------------------------------------------------------------------|--|-------------------------------------------------------------------------------------|--|----------------------------------------------------------------------------------------------------------------------------------------------------------------------------------------------------------------------------------------------------------------------------------------------------------------------------------------------------------------------------------------------------------------------------------------------------------------------------------------------------------------------------------------------------------------------------------------------------------------------------------------------------------------------------------|



|  |  |  |  |  |                                                                                                                                                                                                                                                                                                                                                                                                                                                                                                                                                                   |  |
|--|--|--|--|--|-------------------------------------------------------------------------------------------------------------------------------------------------------------------------------------------------------------------------------------------------------------------------------------------------------------------------------------------------------------------------------------------------------------------------------------------------------------------------------------------------------------------------------------------------------------------|--|
|  |  |  |  |  | <p>PGS group; <math>t(45) = -2.27</math>, 95% CI <math>[-19.11, -1.14]</math>, <math>P = 0.028</math>, Cohen's <math>d = 0.66</math>. <b>There was a significant group difference between the Low and the High autism polygenic score groups in the BRI scores from the BRIEF; BRI <math>t = 62.9</math> in the Low polygenic score group and <math>t = 71.5</math> in the High polygenic score group; <math>t(49) = -2.51</math>, 95% CI <math>[-15.45, -1.71]</math>, <math>P = 0.015</math>, Cohen's <math>d = 0.69</math>. The autism polygenic score</b></p> |  |
|--|--|--|--|--|-------------------------------------------------------------------------------------------------------------------------------------------------------------------------------------------------------------------------------------------------------------------------------------------------------------------------------------------------------------------------------------------------------------------------------------------------------------------------------------------------------------------------------------------------------------------|--|

|                          |                                                          |                                                                                                                                                                                                                                                                                        |                                                 |                                                                                                                                                                                                                                                                                                     |                     |                                                                                                                                                                                                                                                                   |                                    |
|--------------------------|----------------------------------------------------------|----------------------------------------------------------------------------------------------------------------------------------------------------------------------------------------------------------------------------------------------------------------------------------------|-------------------------------------------------|-----------------------------------------------------------------------------------------------------------------------------------------------------------------------------------------------------------------------------------------------------------------------------------------------------|---------------------|-------------------------------------------------------------------------------------------------------------------------------------------------------------------------------------------------------------------------------------------------------------------|------------------------------------|
|                          |                                                          |                                                                                                                                                                                                                                                                                        |                                                 |                                                                                                                                                                                                                                                                                                     |                     | was not associated with parental educational level (fathers education level P = 0.784, mothers education level P = 0.798)                                                                                                                                         |                                    |
| Yap (2021) <sup>31</sup> | Autistic traits, cognition and executive function, other | 2,477 AAB participants that fell into four groups: 1) child participants (aged 2–17 years) diagnosed with autism or queried for the condition, with some multiply-affected families; 2) parents of children with autism; 3) siblings of diagnosed children who did not themselves meet | SbayesR. Bayesian approach, no threshold needed | Autism group: parent- or caregiver-reported ADOS-2, ADOS-G, Developmental, Dimensional and Diagnostic Interview, Vineland Adaptive Behavior Scale, SSP-2. Parent: Communication Checklist-Adult. Siblings/unrelated: Social Responsiveness Scale. Cognitive function in all groups: MSEL or WISC-IV | age, sex and 20 PCs | The autism polygenic score was not associated with autism-related phenotypes. A nominal association with MSEL non-verbal development (r=-0.11, p=7.4e-3 in the autism group alone) <b>and a marginal association with parental WASI matrix reasoning (r=0.07,</b> | Bonferroni correction: p ≤ 0.05/50 |

|                               |                    |                                                                                                                                                                                                                |                                                                                 |                                                                                            |                                           |                                                                                                                                                                                                                                   |     |
|-------------------------------|--------------------|----------------------------------------------------------------------------------------------------------------------------------------------------------------------------------------------------------------|---------------------------------------------------------------------------------|--------------------------------------------------------------------------------------------|-------------------------------------------|-----------------------------------------------------------------------------------------------------------------------------------------------------------------------------------------------------------------------------------|-----|
|                               |                    | autism criteria; and 4) unrelated children without an autism diagnosis and with no known first-degree relatives with an autism diagnosis. Participants were Australian and predominantly of European ancestry. |                                                                                 | WASI. Sleep problems<br>Autism/siblings/<br>unrelated group:<br>Children's Sleep<br>Habits |                                           | <b>p=5.5e-2) is reported.</b>                                                                                                                                                                                                     |     |
| <b>Physical wellbeing</b>     |                    |                                                                                                                                                                                                                |                                                                                 |                                                                                            |                                           |                                                                                                                                                                                                                                   |     |
| Dennison (2021) <sup>71</sup> | Physical wellbeing | 95,744 UKB participants (56.4% female, mean age at recruitment (SD) 56.2 (7.8). Polygenic score analyses were based on a sample of N = 76,409. Participants were British. Genetic ancestry                     | PRSice. Primary: p < .05, sensitivity: p<5x10-8, 5x10-6, 5x10-4, 0.05, 0.1, 0.5 | Accelerometer-measured physical activity                                                   | age, sex, BMI, and genotyping array, 5PCs | The autism polygenic score was associated with reduced levels of overall activity (p = .01), reduced time spent walking (p = .02), increased time spent in sedentary activity (p = 2.5 x 10 <sup>-6</sup> ), and shorter duration | FDR |

|                              |                                                                 |                                                                                                                                                                                                                                                |                 |                                                                                                                                                                                  |                          |                                                                                                                                                                                                                                                                                                         |          |
|------------------------------|-----------------------------------------------------------------|------------------------------------------------------------------------------------------------------------------------------------------------------------------------------------------------------------------------------------------------|-----------------|----------------------------------------------------------------------------------------------------------------------------------------------------------------------------------|--------------------------|---------------------------------------------------------------------------------------------------------------------------------------------------------------------------------------------------------------------------------------------------------------------------------------------------------|----------|
|                              |                                                                 | was restricted to European.                                                                                                                                                                                                                    |                 |                                                                                                                                                                                  |                          | of sleep (p = .01)                                                                                                                                                                                                                                                                                      |          |
| Havdahl (2022) <sup>48</sup> | Specific psychiatric classifications, physical wellbeing, other | The total sample included up to 14,539 MoBa mothers (mean age = 30.00, SD = 4.45) and 14,897 fathers (mean age = 32.46, SD = 5.13) depending on the outcome measure. Participants were Norwegian. Genetic ancestry was restricted to European. | PRSice. P < .05 | Pregnancy-related factors related to maternal lifestyle and health behaviors, metabolism, immune system, other physical health conditions, and (indications for) medication use. | Genotyping batch, 10 PCs | Maternal autism polygenic score was associated with higher odds of experiencing lifetime depression (OR 1.12 (1.08 to 1.16), p= 9.70 × 10 <sup>-9</sup> ) and depression/anxiety symptoms (OR 1.13 (1.06 to 1.19), p = 3.62 × 10 <sup>-5</sup> ).<br><b>Weak evidence for association with migraine</b> | P < .002 |

|  |  |  |  |  |  |                                                                                                                                                                                                                                                                                                                             |  |
|--|--|--|--|--|--|-----------------------------------------------------------------------------------------------------------------------------------------------------------------------------------------------------------------------------------------------------------------------------------------------------------------------------|--|
|  |  |  |  |  |  | <p><b>(OR 1.10 (1.02 to 1.18), p = .009) and urinary tract infection (OR 1.08 (1.02 to 1.14), p = .005) during pregnancy. No significant associations with other pregnancy-related factors. Paternal autism polygenic score was not significantly associated with any pregnancy-related factors measured in fathers</b></p> |  |
|--|--|--|--|--|--|-----------------------------------------------------------------------------------------------------------------------------------------------------------------------------------------------------------------------------------------------------------------------------------------------------------------------------|--|

|                              |                                                          |                                                                                                                                                                                                                                                        |                 |                                                                                                                                                                                                                                                     |                                                                           |                                                                                                                                                                                                                                                                                          |                                                                                        |
|------------------------------|----------------------------------------------------------|--------------------------------------------------------------------------------------------------------------------------------------------------------------------------------------------------------------------------------------------------------|-----------------|-----------------------------------------------------------------------------------------------------------------------------------------------------------------------------------------------------------------------------------------------------|---------------------------------------------------------------------------|------------------------------------------------------------------------------------------------------------------------------------------------------------------------------------------------------------------------------------------------------------------------------------------|----------------------------------------------------------------------------------------|
| Hunjan (2021) <sup>72</sup>  | Physical wellbeing                                       | 163619 UKB participants (45.1% male, mean age = 56.22 (SD = 7.89), range 40-72). Participants were British. Genetic ancestry was restricted to European.                                                                                               | PRSice <0.2     | Nutrient intake: alcohol, protein, carbohydrates, fats, fibre, food weight, folate, calcium, carotene, iron, vitamin B6, B12, C, D, E                                                                                                               | age, sex, 6 PCs                                                           | The autism polygenic score was not associated with nutrient intake (p > 0.05/132)                                                                                                                                                                                                        | Bonferroni correction: 0.05/132, 0.01/132, 0.001/132                                   |
| Leppert (2019) <sup>56</sup> | Specific psychiatric classifications, Physical wellbeing | The sample consisted of ALSPAC mothers (100% female, mean age = 28.5, SD = 4.8). Sample size differed per outcome measures, with a maximum of 7486 and a minimum of 2535 depending on the outcome measure. Participants were British. Genetic ancestry | PRSice. P < .05 | Prenatal factors of maternal lifestyle, maternal use of nutritional supplements and medications in pregnancy, maternal illnesses and conditions, biomarkers of nutritional status and toxin exposure in pregnancy, perinatal factors and conditions | 10 PCs, analyses of child polygenic score included 10 PCs and child's sex | Maternal autism polygenic score was positively associated with severe depression (p = .01) and stressful life events score in the first (p = 3 x 10 <sup>-4</sup> ) and third (p = .004) trimester of pregnancy, <b>but no other maternal illnesses or conditions, lifestyle-related</b> | Correction based on number of PCs that explained 80% of covariance: P < .0024 (.05/21) |

|                               |                    |                                                                                                                                                                                                          |                                         |                                |                                                  |                                                                                                                                                                                                                                                                                        |              |
|-------------------------------|--------------------|----------------------------------------------------------------------------------------------------------------------------------------------------------------------------------------------------------|-----------------------------------------|--------------------------------|--------------------------------------------------|----------------------------------------------------------------------------------------------------------------------------------------------------------------------------------------------------------------------------------------------------------------------------------------|--------------|
|                               |                    | was restricted to European.                                                                                                                                                                              |                                         |                                |                                                  | <b>prenatal exposures (<math>p \geq .09</math>), blood biomarkers (<math>p \geq .24</math>), and perinatal exposures and conditions (<math>p \geq .28</math>).</b> The child's autism polygenic score was also not associated with perinatal exposures and conditions ( $p \geq .39$ ) |              |
| Niarchou (2022) <sup>73</sup> | Physical wellbeing | A total of 349 individuals with autism from the BioVU sample and 1049 individuals of the MSSNG sample. There were N = 253 individuals (81% males, mean age = 17.2(SD = 5.0), age range= 5–38 years) with | PRS-CS. No threshold, Bayesian approach | Clinical diagnosis of insomnia | Sex, age at the time of chart review, and 10 PCs | No significant association between autism polygenic score and insomnia in MSSNG (SMD -.03, 95% CI -.17 – 0.11) nor BioVU (SMD = .12, 95% CI -.10 - .34). The pooled association was also not significant                                                                               | Not reported |

|  |  |                                                                                                                                                                                                                                                                                                                                                                                                                      |  |  |  |                                                   |  |
|--|--|----------------------------------------------------------------------------------------------------------------------------------------------------------------------------------------------------------------------------------------------------------------------------------------------------------------------------------------------------------------------------------------------------------------------|--|--|--|---------------------------------------------------|--|
|  |  | <p>insomnia in the MSSNG dataset and N = 796 controls (79% males, mean age = 17.3 (SD = 6.9), age range= 5–71 years) while there were N = 228 individuals with insomnia in BioVU (79% males, mean age= 20.8 (SD = 9.6), age range= 6–68 years) and N = 121 controls (77% males, mean age = 22.5 (SD = 12.2), age range= 7–66). Participants were Dutch or American. Genetic ancestry was restricted to European.</p> |  |  |  | <p>(random effects model, SMD=0.02, p = 0.79)</p> |  |
|--|--|----------------------------------------------------------------------------------------------------------------------------------------------------------------------------------------------------------------------------------------------------------------------------------------------------------------------------------------------------------------------------------------------------------------------|--|--|--|---------------------------------------------------|--|



|                          |                    |                                                                                                                                                                                                                     |                                                                                             |                                                                                                                                                                                                                                                                                                           |              |                                                                                                                                                                                                                                                                                                                                                                                                                                            |                       |
|--------------------------|--------------------|---------------------------------------------------------------------------------------------------------------------------------------------------------------------------------------------------------------------|---------------------------------------------------------------------------------------------|-----------------------------------------------------------------------------------------------------------------------------------------------------------------------------------------------------------------------------------------------------------------------------------------------------------|--------------|--------------------------------------------------------------------------------------------------------------------------------------------------------------------------------------------------------------------------------------------------------------------------------------------------------------------------------------------------------------------------------------------------------------------------------------------|-----------------------|
| Ohi (2021) <sup>74</sup> | Physical wellbeing | The target dataset consisted of data from 9683 children aged 9–10 years with a mean age of 9.9 years, 52.3% of whom were males. Participants were American. 50.5% were participants of European ancestry (n = 4920) | PRSice-2. $PT \leq 0.01$ , $PT \leq 0.05$ , $PT \leq 0.1$ , $PT \leq 0.5$ , and $PT \leq 1$ | Sleep disturbance disturbance in children (total, disorders of arousal or nightmares, disorders of initiating and maintaining sleep, disorders of excessive somnolence, sleep breathing disorders, sleep hyperhidrosis, sleep-wake transition disorders; The Sleep Disturbance Scale for Children (SDSC)) | Not reported | The autism polygenic score was not associated with overall sleep disturbance in European and trans-ancestry children ( $p > .05$ ). Autism polygenic score was weakly positively associated with disorders of initiating and maintaining sleep (maximum at $PT \leq 0.1$ : $R^2 = 0.0013$ , $p = 0.012$ ), but not disorders of arousal or nightmares, excessive somnolence, sleep breathing disorders, sleep hyperhidrosis, or sleep-wake | Bonferroni correction |
|--------------------------|--------------------|---------------------------------------------------------------------------------------------------------------------------------------------------------------------------------------------------------------------|---------------------------------------------------------------------------------------------|-----------------------------------------------------------------------------------------------------------------------------------------------------------------------------------------------------------------------------------------------------------------------------------------------------------|--------------|--------------------------------------------------------------------------------------------------------------------------------------------------------------------------------------------------------------------------------------------------------------------------------------------------------------------------------------------------------------------------------------------------------------------------------------------|-----------------------|

|                             |                    |                                                                                                                                                                                                                                                                           |                    |                      |                                                                                                          |                                                                                                                           |                     |
|-----------------------------|--------------------|---------------------------------------------------------------------------------------------------------------------------------------------------------------------------------------------------------------------------------------------------------------------------|--------------------|----------------------|----------------------------------------------------------------------------------------------------------|---------------------------------------------------------------------------------------------------------------------------|---------------------|
|                             |                    |                                                                                                                                                                                                                                                                           |                    |                      |                                                                                                          | transition disorders                                                                                                      |                     |
| Werner (2022) <sup>75</sup> | Physical wellbeing | 1,004 TOP patients with severe mental disorder (SCZ N = 595, 42.5% female, mean age 31.6 (10.1), BD n = 409, 58.7% female, mean age = 35.0 (12.4)) and N = 947 healthy controls (46% female, mean age = 34.0 (9.3), out of which polygenic score data was available for N | PRSice-2. P = 0.05 | Immune marker levels | Age at blood sampling, sex, freezer storage time, genetic principal components 1 and 2 and genetic batch | The autism polygenic score was significantly associated with 1 out of 7 immune marker levels ( $r^2 = -.08$ , $p = .04$ ) | P = 0.0125 (0.05/4) |

|                            |                                                                            |                                                                                                                                                                                                                                                             |                                                                                                                                                                                                      |                                                                                                                                          |                                                |                                                                                                                                                                                                                                                   |     |
|----------------------------|----------------------------------------------------------------------------|-------------------------------------------------------------------------------------------------------------------------------------------------------------------------------------------------------------------------------------------------------------|------------------------------------------------------------------------------------------------------------------------------------------------------------------------------------------------------|------------------------------------------------------------------------------------------------------------------------------------------|------------------------------------------------|---------------------------------------------------------------------------------------------------------------------------------------------------------------------------------------------------------------------------------------------------|-----|
|                            |                                                                            | = 1,802 individuals. Participants were Norwegian. Genetic ancestry was restricted to European.                                                                                                                                                              |                                                                                                                                                                                                      |                                                                                                                                          |                                                |                                                                                                                                                                                                                                                   |     |
| Zhang (2022) <sup>37</sup> | Autism diagnosis, specific psychiatric classifications, physical wellbeing | The sample consisted of 3189 ANGI individuals diagnosed with an eating disorder, 134 of whom were also diagnosed with autism. Of the individuals without autism, 1.9% was male and mean birth year was 1988.77 (5.54). Of the individuals with autism, 5.2% | Plink. First principal components for polygenic scores built from 10 thresholds (p-values: 5 x 10 <sup>-8</sup> , 1 x 10 <sup>-6</sup> , 1 x 10 <sup>-4</sup> , 0.001, 0.01, 0.05, 0.1, 0.2, 0.5, 1) | <b>Eating disorder severity and persistence</b> , eating disorder treatment, suicidal behaviour and self-harm. Autism diagnostic status. | Sex and birth year in 3 year intervals, 10 PCs | <b>The autism polygenic score was not statistically significantly associated with any ED severity, persistence, and treatment outcomes nor suicidal behaviour and self-harm (OR range: 0.79–1.02, β range: –0.34–0.03, IRR range: 0.82–1.06).</b> | FDR |

|                               |                                                                               |                                                                                                                                                                                                                                                                     |                                                                                                                                                                            |                                                                                                                                                                                                                             |                                                                                            |                                                                                                                                                                                                                                |                                                             |
|-------------------------------|-------------------------------------------------------------------------------|---------------------------------------------------------------------------------------------------------------------------------------------------------------------------------------------------------------------------------------------------------------------|----------------------------------------------------------------------------------------------------------------------------------------------------------------------------|-----------------------------------------------------------------------------------------------------------------------------------------------------------------------------------------------------------------------------|--------------------------------------------------------------------------------------------|--------------------------------------------------------------------------------------------------------------------------------------------------------------------------------------------------------------------------------|-------------------------------------------------------------|
|                               |                                                                               | was male and mean birth year was 1989.04. All participants were Swedish. Genetic ancestry is not reported.                                                                                                                                                          |                                                                                                                                                                            |                                                                                                                                                                                                                             |                                                                                            | Autism polygenic score was not associated with autism diagnostic status ( $R^2 = 0.0182$ )                                                                                                                                     |                                                             |
| Early neurodevelopment        |                                                                               |                                                                                                                                                                                                                                                                     |                                                                                                                                                                            |                                                                                                                                                                                                                             |                                                                                            |                                                                                                                                                                                                                                |                                                             |
| Askeland (2020) <sup>38</sup> | Autistic traits, specific psychiatric classifications, early neurodevelopment | The sample was MoBa and the size varied per measure and age, ranging from 6915 boys and 6640 girls at its highest to 1603 boys and 1508 girls at its lowest. Overall, the sample contained about 50% girls. Participants were assessed at 6 and 18 months, 3 years, | PRSice. First principal component for polygenic scores built from 10 thresholds ( $<5e-8$ , $<1e-6$ , $<1e-4$ , $<.001$ , $<.01$ , $<.05$ , $<.1$ , $<.2$ , $<.5$ . and 1) | Mother-reported questionnaire data at ages 6 and 18 months and 3,5, and 8 years: Social communication difficulties, repetitive behavior, inattention and hyperactivity, <b>language difficulties and motor difficulties</b> | Genotyping batch and 10 PCs. Sex differences assessed by adding sex as a grouping variable | In association analyses of autism polygenic score and repetitive behaviour, social communication, language difficulties, motor difficulties, hyperactivity and inattention at several ages in childhood, positive associations | Bonferroni-correction for number of effective tests: .05/16 |

|  |  |                                                                                                           |  |  |  |                                                                                                                                                                                                                                                                                                                                                               |  |
|--|--|-----------------------------------------------------------------------------------------------------------|--|--|--|---------------------------------------------------------------------------------------------------------------------------------------------------------------------------------------------------------------------------------------------------------------------------------------------------------------------------------------------------------------|--|
|  |  | 5 years and 8 years. The participants were all Norwegian and genetic ancestry was restricted to European. |  |  |  | were only reported for <b>language difficulties at 18 months</b> ( $\beta = .032$ , CI = 0.012–0.052), <b>motor difficulties at 3 years</b> ( $\beta = .034$ , CI = 0.012–0.057), hyperactivity at 8 years ( $\beta = .038$ , CI = 0.013–0.063), and inattention at 8 years ( $\beta = .052$ , CI = 0.027–0.077). No other significant results were reported. |  |
|--|--|-----------------------------------------------------------------------------------------------------------|--|--|--|---------------------------------------------------------------------------------------------------------------------------------------------------------------------------------------------------------------------------------------------------------------------------------------------------------------------------------------------------------------|--|

|                                     |                               |                                                                                                                                                                                                                                                                                                      |                                                                                                                                                                                                                                                                                                    |                                                                                                                                                                                                               |                                                        |                                                                                                                                                                                                                                                                                                                                                                                                               |                           |
|-------------------------------------|-------------------------------|------------------------------------------------------------------------------------------------------------------------------------------------------------------------------------------------------------------------------------------------------------------------------------------------------|----------------------------------------------------------------------------------------------------------------------------------------------------------------------------------------------------------------------------------------------------------------------------------------------------|---------------------------------------------------------------------------------------------------------------------------------------------------------------------------------------------------------------|--------------------------------------------------------|---------------------------------------------------------------------------------------------------------------------------------------------------------------------------------------------------------------------------------------------------------------------------------------------------------------------------------------------------------------------------------------------------------------|---------------------------|
| <p>Hannigan (2023)<sup>76</sup></p> | <p>Early neurodevelopment</p> | <p>Sample size varies per outcome measure, with a maximum of 10848 males and 9475 females and a minimum of 1654 males and 1523 females depending on the outcome measure. Participants were assessed at different ages. Participants were Norwegian. Genetic ancestry was restricted to European.</p> | <p>PRSice. First Principal components for polygenic scores built from 10 thresholds (<math>&lt;5e-8</math>, <math>&lt;1e-6</math>, <math>&lt;1e-5</math>, <math>&lt;.001</math>, <math>&lt;.005</math>, <math>&lt;.01</math>, <math>&lt;.1</math>, <math>&lt;.5</math> and <math>&lt;1</math>)</p> | <p>Age of first walking, motor delays at 18 months, age at first words, age at first sentences, rate (age at first sentences – age at first words), language delays at 3 years, concern about development</p> | <p>Genotype batch, 10 PCs, sex as groupig variable</p> | <p>The autism polygenic score was significantly positively associated with age at first walking in females and male/female sample, but not a male sample. It was not associated with motor delays at 18 months, age at first words, age at first sentences, rate (age at first sentences-age at first words), language delays at 3 years and concern regarding development expressed by others at 3 years</p> | <p>FDR and Bonferroni</p> |
|-------------------------------------|-------------------------------|------------------------------------------------------------------------------------------------------------------------------------------------------------------------------------------------------------------------------------------------------------------------------------------------------|----------------------------------------------------------------------------------------------------------------------------------------------------------------------------------------------------------------------------------------------------------------------------------------------------|---------------------------------------------------------------------------------------------------------------------------------------------------------------------------------------------------------------|--------------------------------------------------------|---------------------------------------------------------------------------------------------------------------------------------------------------------------------------------------------------------------------------------------------------------------------------------------------------------------------------------------------------------------------------------------------------------------|---------------------------|

|                           |                        |                                                                                                                                                                                                                                                                                                                                    |                  |                                                                                   |                                                           |                                                                                                                                                                                                                                                                                                                                                                                                                                                         |                                                                        |
|---------------------------|------------------------|------------------------------------------------------------------------------------------------------------------------------------------------------------------------------------------------------------------------------------------------------------------------------------------------------------------------------------|------------------|-----------------------------------------------------------------------------------|-----------------------------------------------------------|---------------------------------------------------------------------------------------------------------------------------------------------------------------------------------------------------------------------------------------------------------------------------------------------------------------------------------------------------------------------------------------------------------------------------------------------------------|------------------------------------------------------------------------|
| Fish (2021) <sup>77</sup> | Early neurodevelopment | 264 BASIS-STAARS participants that either had a sibling with formal autism diagnosis (n = 195) or no autism family history (n = 69). A total of 190 infants were included in polygenic score analyses. Measurements were taken at 9, 14 and 24 months old. Participants were British. Genetic ancestry was restricted to European. | PRSice. P = .021 | Pupillary light reflex amplitude and latency development (9- to 14-/14- 24-month) | 2 PCs, percentage of missing trials, baseline pupil size, | <p>Amplitude: No significant association between autism polygenic score and amplitude change (9 to 14 months: b = .02, SE = 0.08, 95% CI = -0.14, 0.18; 14 to 24 months: b = .07, SE = 0.08, 95% CI = 0.09, 0.23).</p> <p>Latency: higher autism polygenic score was associated with a smaller decrease in latency between 9 and 14 months (b = .16, SE = 0.08, 95% CI = 0.31, 0.002). Within this subset of infants, latency did not significantly</p> | Not for primary analyses, Bonferroni correction reported as comparison |
|---------------------------|------------------------|------------------------------------------------------------------------------------------------------------------------------------------------------------------------------------------------------------------------------------------------------------------------------------------------------------------------------------|------------------|-----------------------------------------------------------------------------------|-----------------------------------------------------------|---------------------------------------------------------------------------------------------------------------------------------------------------------------------------------------------------------------------------------------------------------------------------------------------------------------------------------------------------------------------------------------------------------------------------------------------------------|------------------------------------------------------------------------|

|                          |                        |                                                                                                                                                                                                                     |               |                                                  |                                                                                         |                                                                                                                                                                                                                                |              |
|--------------------------|------------------------|---------------------------------------------------------------------------------------------------------------------------------------------------------------------------------------------------------------------|---------------|--------------------------------------------------|-----------------------------------------------------------------------------------------|--------------------------------------------------------------------------------------------------------------------------------------------------------------------------------------------------------------------------------|--------------|
|                          |                        |                                                                                                                                                                                                                     |               |                                                  |                                                                                         | change between 14 and 24 months (b = -.08, SE = 0.08, 95% CI = -0.23, 0.08); autism polygenic score was not significantly associated with individual differences in change profile (b = -.14, SE = 0.08, 95% CI = -0.29, 0.01) |              |
| Gui (2020) <sup>78</sup> | Early neurodevelopment | A total of 335 BASIS-STAARS participants were included (171 male, mean age in months = 14.37 (1.17)), of which 250 with elevated likelihood of autism (131 males) and 85 with typical likelihood of autism based on | LDpred. P = 1 | Peak look duration at face stimulus at 14 months | Number of valid trials, age in months, 5 PCs. Analyses repeated with Phase as covariate | The autism polygenic score was not associated with peak-look durations at the face (F(1,179) = 0.017, p = .898, n2p < 0.001) nor mean peak look to all stimuli (F(1,179) = 0.341, p = .559, n2p = 0.002)                       | Not reported |



|                                |                        |                                                                                                                                                    |                                                |                        |                                                           |                                                                                                                                                        |              |
|--------------------------------|------------------------|----------------------------------------------------------------------------------------------------------------------------------------------------|------------------------------------------------|------------------------|-----------------------------------------------------------|--------------------------------------------------------------------------------------------------------------------------------------------------------|--------------|
|                                |                        | family history of first-degree relatives. Participants were British. Genetic ancestry was restricted to European.                                  |                                                |                        |                                                           |                                                                                                                                                        |              |
| Portugal. (2021) <sup>79</sup> | Early neurodevelopment | 510 infants (245 female), mean age in days = 167.7 (SD =8.59, range = 145 – 203). Participants were Swedish. Genetic ancestry was mostly European. | PRS-CS. Bayesian approach, no threshold needed | Pupillary light reflex | Age, sex, year of data collection, number of valid trials | The autism polygenic score was not significantly associated with pupillary light reflex relative constriction (b = .01, p = .830), baseline pupil size | Not reported |

|                                 |                                         |                                                                                                                                                                                                                        |                                                                                                                    |                                                                                                                                                                                                   |                                                        |                                                                                                                                                                                                                                          |                                            |
|---------------------------------|-----------------------------------------|------------------------------------------------------------------------------------------------------------------------------------------------------------------------------------------------------------------------|--------------------------------------------------------------------------------------------------------------------|---------------------------------------------------------------------------------------------------------------------------------------------------------------------------------------------------|--------------------------------------------------------|------------------------------------------------------------------------------------------------------------------------------------------------------------------------------------------------------------------------------------------|--------------------------------------------|
| Riglin (2022) <sup>29</sup>     | Early neurodevelopment                  | Primary analyses sample size varied from 5880–6328 depending on the outcome variable. Participants were assessed at 18 months and 2 years old. Participants were British. Genetic ancestry was restricted to European. | PRSice. First principal component of PGS at various threshold.                                                     | Motor development: Fine and gross motor skills (Denver Developmental Screening Test), language development (MacArthur Communicative Development Inventory), temperament (Carey Temperament Scale) | Not reported                                           | The autism polygenic score was not significantly associated with toddler development (domains: motor, language, and temperament, $p \geq .06$ )                                                                                          | Bonferroni correction: $0.05/11 = 0.005$   |
| Serdarevic (2020) <sup>43</sup> | Autistic traits, early neurodevelopment | The sample was Generation R and consisted of 1174 infants between 9 and 20 weeks old. Mean age was 12.6 weeks (SD = 20). 48.7% were girls. Mothers were on average 31.3 years old. All participants were Dutch.        | PRSice . Six different p-value thresholds (pTs) with pT , .001, pT , .01, pT , .05, pT , .10, pT , .50, and pT , 1 | <b>Infant neuromotor scores (modified version of the Touwen’s Neurodevelopmental Examination),</b> autistic traits (SRS)                                                                          | Child’s sex, maternal age and maternal education level | Children with higher autism polygenic score had higher autistic trait scores at 6 years of age (pT , .50, $b = .08$ , 95% CI = .03, .13, $p = .01$ ). <b>A higher autism polygenic score was positively associated with less optimal</b> | Bonferroni correction: $p = .05/10 = .005$ |

|  |  |                                              |  |  |  |                                                                                                                                                                                                                                                                                                                                                                                                                                                       |  |
|--|--|----------------------------------------------|--|--|--|-------------------------------------------------------------------------------------------------------------------------------------------------------------------------------------------------------------------------------------------------------------------------------------------------------------------------------------------------------------------------------------------------------------------------------------------------------|--|
|  |  | Genetic ancestry was restricted to European. |  |  |  | <p><b>overall neuromotor development during infancy (e.g., with GWAS pT , 1, b = .048, 95% confidence interval [CI] = .007, .090, p = .02) There was a relationship between autism polygenic score and overall muscle tone and, in particular, low muscle tone (e.g., with GWAS pT , .50, b = .068, 95% CI = .015, .120, p = .01). Stratified analysis showed that this association was present in boys only. In addition, boys with a higher</b></p> |  |
|--|--|----------------------------------------------|--|--|--|-------------------------------------------------------------------------------------------------------------------------------------------------------------------------------------------------------------------------------------------------------------------------------------------------------------------------------------------------------------------------------------------------------------------------------------------------------|--|

|                                |                                         |                                                                                                                                                                                                                                                                                   |                                                                                                                 |                                                                                                                                                                                                                                     |       |                                                                                                                                                                                                                                                                                                                                |                                               |
|--------------------------------|-----------------------------------------|-----------------------------------------------------------------------------------------------------------------------------------------------------------------------------------------------------------------------------------------------------------------------------------|-----------------------------------------------------------------------------------------------------------------|-------------------------------------------------------------------------------------------------------------------------------------------------------------------------------------------------------------------------------------|-------|--------------------------------------------------------------------------------------------------------------------------------------------------------------------------------------------------------------------------------------------------------------------------------------------------------------------------------|-----------------------------------------------|
|                                |                                         |                                                                                                                                                                                                                                                                                   |                                                                                                                 |                                                                                                                                                                                                                                     |       | autism polygenic score had less optimal scores in senses and other observations during infancy (e.g., with GWAS pT , .043, b = .003, 95% CI = .003, .084, p = .02)                                                                                                                                                             |                                               |
| Takahashi (2020) <sup>44</sup> | Autistic traits, early neurodevelopment | This study included 876 Hamamatsu Birth Cohort for Mothers and Children (HBC Study) participants born between December 2007 and June 2011. Polygenic score analyses were performed on 726 participants (51.4% boys). All participants were born in Japan and most (99.1%) were of | PRSice . Different p-values ranging from $5 \times 10^{-8}$ to greater than .99, of which best fit was selected | <b>Neurodevelopmental progress at 18 months (Mullen Scales of Early Learning (MSEL))</b> , autistic traits at age 6 (Autism Diagnostic Observation Schedule (ADOS-2) total scores, social affect and restricted repetitive behavior | 4 PCs | The autism polygenic score was associated with autistic traits measured by total scores on the ADOS-2 ( $R^2 = 0.024$ ; $\beta$ , 0.71; SE, 0.25; corrected P = .03) and social affect ( $R^2 = 0.027$ ; $\beta$ , 0.63; SE, 0.22; corrected P = .03) but not restricted repetitive behavior ( $R^2 = 0.023$ ; $\beta$ , 0.19; | Bonferroni correction for 8 independent tests |

|  |  |                   |  |  |  |                                                                                                                                                                                                                                                                                                                                                                                                                                                |  |
|--|--|-------------------|--|--|--|------------------------------------------------------------------------------------------------------------------------------------------------------------------------------------------------------------------------------------------------------------------------------------------------------------------------------------------------------------------------------------------------------------------------------------------------|--|
|  |  | Japanese descent. |  |  |  | SE, 0.07; corrected P = .06). The association of autism polygenic score with infant neurodevelopment was most significant for gross motor skills (R2 = 0.015; $\beta$ , -1.25; SE, 0.39; corrected P = .01) and <b>receptive language skills (R2 = 0.014; <math>\beta</math>, -1.19; SE, 0.39; corrected P = .02) measured by the MSEL, but not with fine motor skills, expressive language development and visual reception (p &gt;= .22)</b> |  |
|--|--|-------------------|--|--|--|------------------------------------------------------------------------------------------------------------------------------------------------------------------------------------------------------------------------------------------------------------------------------------------------------------------------------------------------------------------------------------------------------------------------------------------------|--|

|                          |                                                          |                                                                                                                                                                                                                                                                                                                                                                                                                                  |                                                 |                                                                                                                                                                                                                                                                                                                                                                                   |                     |                                                                                                                                                                                                                                                                                          |                                         |
|--------------------------|----------------------------------------------------------|----------------------------------------------------------------------------------------------------------------------------------------------------------------------------------------------------------------------------------------------------------------------------------------------------------------------------------------------------------------------------------------------------------------------------------|-------------------------------------------------|-----------------------------------------------------------------------------------------------------------------------------------------------------------------------------------------------------------------------------------------------------------------------------------------------------------------------------------------------------------------------------------|---------------------|------------------------------------------------------------------------------------------------------------------------------------------------------------------------------------------------------------------------------------------------------------------------------------------|-----------------------------------------|
| Yap (2021) <sup>31</sup> | Autistic traits, cognition and executive function, other | 2,477 AAB participants that fell into four groups: 1) child participants (aged 2–17 years) diagnosed with autism or queried for the condition, with some multiply-affected families; 2) parents of children with autism; 3) siblings of diagnosed children who did not themselves meet autism criteria; and 4) unrelated children without an autism diagnosis and with no known first-degree relatives with an autism diagnosis. | SbayesR. Bayesian approach, no threshold needed | Autism group: parent- or caregiver-reported ADOS-2, ADOS-G, Developmental, Dimensional and Diagnostic Interview, Vineland Adaptive Behavior Scale, SSP-2. Parent: Communication Checklist-Adult. Siblings/unrelated: Social Responsiveness Scale. Cognitive function in all groups: MSEL or WISC-IV WASI. Sleep problems Autism/siblings/unrelated group: Children’s Sleep Habits | age, sex and 20 PCs | The autism polygenic score was not associated with autism-related phenotypes. <b>A nominal association with MSEL non-verbal development (r=-0.11, p=7.4e-3 in the autism group alone)</b> and a marginal association with parental WASI matrix reasoning (r=0.07, p=5.5e-2) is reported. | Bonferroni correction: $p \leq 0.05/50$ |
|--------------------------|----------------------------------------------------------|----------------------------------------------------------------------------------------------------------------------------------------------------------------------------------------------------------------------------------------------------------------------------------------------------------------------------------------------------------------------------------------------------------------------------------|-------------------------------------------------|-----------------------------------------------------------------------------------------------------------------------------------------------------------------------------------------------------------------------------------------------------------------------------------------------------------------------------------------------------------------------------------|---------------------|------------------------------------------------------------------------------------------------------------------------------------------------------------------------------------------------------------------------------------------------------------------------------------------|-----------------------------------------|

|                          |                                                                           |                                                                                                                                                                                                                                                                                                          |                                                                                                                                   |                                                                                                           |                                                                    |                                                                                                                                                                                                                                                                                                                                                |                       |
|--------------------------|---------------------------------------------------------------------------|----------------------------------------------------------------------------------------------------------------------------------------------------------------------------------------------------------------------------------------------------------------------------------------------------------|-----------------------------------------------------------------------------------------------------------------------------------|-----------------------------------------------------------------------------------------------------------|--------------------------------------------------------------------|------------------------------------------------------------------------------------------------------------------------------------------------------------------------------------------------------------------------------------------------------------------------------------------------------------------------------------------------|-----------------------|
|                          |                                                                           | Participants were Australian and predominantly of European ancestry.                                                                                                                                                                                                                                     |                                                                                                                                   |                                                                                                           |                                                                    |                                                                                                                                                                                                                                                                                                                                                |                       |
| Emotion recognition      |                                                                           |                                                                                                                                                                                                                                                                                                          |                                                                                                                                   |                                                                                                           |                                                                    |                                                                                                                                                                                                                                                                                                                                                |                       |
| Qin (2020) <sup>58</sup> | Specific psychiatric classifications, brain measures, Emotion recognition | Total sample of 345 participants. Patients with schizophrenia (n = 121) mean age at scan = 24.24 (SD = 9.03), 36 male. Healthy controls (n = 224) mean age at scan = 34.71 (SD = 12.69), 83 male. Of these, 116 with schizophrenia and 212 controls were taken into analyses. Participants were Chinese. | PRSice. 103 PT (ranging from 0 to 0.5 with increments of 0.005, plus 10 <sup>-5</sup> , 10 <sup>-4</sup> , and 10 <sup>-3</sup> ) | <b>MRI. Facial emotion recognition (Chinese Facial Affective Picture System).</b> Schizophrenia diagnosis | Age, sex, education, disease status, and the first four components | Positive correlation between autism polygenic score and amplitude of low frequency fluctuation (ALFF) in left amygdala in the total sample of schizophrenia cases and controls (r = 0.2122, P <sub>uncorrected</sub> = 0.0002483, P <sub>corrected</sub> = 0.022). <b>Negative correlation of autism polygenic score with negative emotion</b> | Bonferroni correction |

|  |  |  |  |  |  |                                                                                                                                                                                                                                                                                                                                        |  |
|--|--|--|--|--|--|----------------------------------------------------------------------------------------------------------------------------------------------------------------------------------------------------------------------------------------------------------------------------------------------------------------------------------------|--|
|  |  |  |  |  |  | <p><b>recognition (r = -0.2288, Puncorrected = 0.000149, Pcorrected = 0.0006). No associations with other brain regions nor types of emotion recognition were found.</b> No significant associations were observed between the autism polygenic score and schizophrenia at different p value thresholds (p <math>\geq</math> .368)</p> |  |
|--|--|--|--|--|--|----------------------------------------------------------------------------------------------------------------------------------------------------------------------------------------------------------------------------------------------------------------------------------------------------------------------------------------|--|



|                           |                                      |                                                                                                                                                                                                                                                                      |                                                                                                                                                                                                                               |                                                                                                                                                                           |                                  |                                                                                                                                                                                                                                                                                                          |                 |
|---------------------------|--------------------------------------|----------------------------------------------------------------------------------------------------------------------------------------------------------------------------------------------------------------------------------------------------------------------|-------------------------------------------------------------------------------------------------------------------------------------------------------------------------------------------------------------------------------|---------------------------------------------------------------------------------------------------------------------------------------------------------------------------|----------------------------------|----------------------------------------------------------------------------------------------------------------------------------------------------------------------------------------------------------------------------------------------------------------------------------------------------------|-----------------|
| Reed (2021) <sup>41</sup> | Autistic traits, emotion recognition | ALSPAC includes a total of 14901 participants, of which about 50% is female. Detailed information about the participants that were included in this study specifically was not reported. All participants were British. Genetic ancestry was restricted to European. | Plink. Thirteen different polygenic scores based on p-values 0.5, 0.4, 0.3, 0.2, 0.1, 0.05, 0.01, 1x10 <sup>-3</sup> , 1x10 <sup>-4</sup> , 1x10 <sup>-5</sup> , 1x10 <sup>-6</sup> , 1x10 <sup>-7</sup> , 5x10 <sup>-8</sup> | <b>Emotion recognition at age 8 assessed DANVA and at age 24 using ERT.</b> Social autistic traits assessed using the Social and Communication Disorders Checklist (SCDC) | child's sex and the first 10 PCs | The autism polygenic score was significantly positively associated with social autistic traits at age 8 (SCDC; (b = 0.05; 95% CI: 0.01 to 0.08; p = .01), <b>but not with emotion recognition at age 8 (DANVA) and age 24 (ERT).</b> After correction for multiple testing no results remain significant | 0.004 (0.05/13) |
|---------------------------|--------------------------------------|----------------------------------------------------------------------------------------------------------------------------------------------------------------------------------------------------------------------------------------------------------------------|-------------------------------------------------------------------------------------------------------------------------------------------------------------------------------------------------------------------------------|---------------------------------------------------------------------------------------------------------------------------------------------------------------------------|----------------------------------|----------------------------------------------------------------------------------------------------------------------------------------------------------------------------------------------------------------------------------------------------------------------------------------------------------|-----------------|

|                                 |                     |                                                                                                                                                                                                                                                                                                                                                                                                        |                                                     |                                                                                                                                                                                                                                                                                                                                                                                     |                           |                                                                                                                                                                                                                                                                                                                                                                                                                                                 |     |
|---------------------------------|---------------------|--------------------------------------------------------------------------------------------------------------------------------------------------------------------------------------------------------------------------------------------------------------------------------------------------------------------------------------------------------------------------------------------------------|-----------------------------------------------------|-------------------------------------------------------------------------------------------------------------------------------------------------------------------------------------------------------------------------------------------------------------------------------------------------------------------------------------------------------------------------------------|---------------------------|-------------------------------------------------------------------------------------------------------------------------------------------------------------------------------------------------------------------------------------------------------------------------------------------------------------------------------------------------------------------------------------------------------------------------------------------------|-----|
| Waddington (2021) <sup>80</sup> | Emotion recognition | 552 NeuroIMAGE and BAO participants, of which there were 74 ADHD participants, 60 unaffected siblings of ADHD, 85 autism participants, 60 autism + ADHD participants, 117 unaffected siblings of autism and autism + ADHD, and 156 controls (41 from NeuroIMAGE and 115 from BOA). Participants age ranged from 7 to 18 years. Of the included NeuroIMAGE participants, the average IQ was 100 ranging | PRSice. $5 \times 10^{-8}$ , $10^{-6}$ , .05, and 1 | Factors of emotion recognition: Emotion recognition was assessed through speed and accuracy performance in the Facial Expressions Identification and Affective Prosody Tasks from the Amsterdam Neuropsychological Test (ANT) through confirmatory factor analysis.<br><br>Emotion recognition classes/profiles identified based on participants' performance on these four factors | Age, gender, IQ and 4 PCs | Factors: there was no effect of the autism polygenic score on the overarching combined emotion recognition factor model at any of the p-value thresholds tested. One association with a specific factor was reported: speed of visual emotion recognition factor (Factor 1) at the $p_T = .05$ threshold ( $F[1,499.24] = 4.17$ , $p = .042$ , $d = .17$ ), but there were no effects on any other GWAS threshold and other individual factors. | FDR |
|---------------------------------|---------------------|--------------------------------------------------------------------------------------------------------------------------------------------------------------------------------------------------------------------------------------------------------------------------------------------------------------------------------------------------------------------------------------------------------|-----------------------------------------------------|-------------------------------------------------------------------------------------------------------------------------------------------------------------------------------------------------------------------------------------------------------------------------------------------------------------------------------------------------------------------------------------|---------------------------|-------------------------------------------------------------------------------------------------------------------------------------------------------------------------------------------------------------------------------------------------------------------------------------------------------------------------------------------------------------------------------------------------------------------------------------------------|-----|

|  |  |                                                                                                                                                                                                           |  |  |  |                                                                                                                                                                                                                                                                                                                                                                                                                                                                                                                |  |
|--|--|-----------------------------------------------------------------------------------------------------------------------------------------------------------------------------------------------------------|--|--|--|----------------------------------------------------------------------------------------------------------------------------------------------------------------------------------------------------------------------------------------------------------------------------------------------------------------------------------------------------------------------------------------------------------------------------------------------------------------------------------------------------------------|--|
|  |  | <p>from 70 to 139, with 51.4% being male. The BOA sample had an average IQ of 103, ranging from 70 to 155, and 59.7% were male. Participants were Dutch. Genetic ancestry was restricted to European.</p> |  |  |  | <p>Classes: Autism polygenic score was associated with emotion recognition classes at the <math>p_T = 1</math> threshold (<math>F[3,461.58] = 3.26, p = .021</math>; class 3 (impulsive/imprecise visual, average auditory emotion recognition) had a significantly reduced autism polygenic score compared to class 1 (average visual, impulsive auditory emotion recognition; <math>p = .005</math>), class 2 (average strong visual and auditory emotion recognition; <math>p = .002</math>), and class</p> |  |
|--|--|-----------------------------------------------------------------------------------------------------------------------------------------------------------------------------------------------------------|--|--|--|----------------------------------------------------------------------------------------------------------------------------------------------------------------------------------------------------------------------------------------------------------------------------------------------------------------------------------------------------------------------------------------------------------------------------------------------------------------------------------------------------------------|--|

|                              |                |                                                                                                                                                                                                                                                                                          |                                                                                                                             |                                                                                                                                                                                                                                                        |                                                                                                                                                             |                                                                                                                                                                                         |     |
|------------------------------|----------------|------------------------------------------------------------------------------------------------------------------------------------------------------------------------------------------------------------------------------------------------------------------------------------------|-----------------------------------------------------------------------------------------------------------------------------|--------------------------------------------------------------------------------------------------------------------------------------------------------------------------------------------------------------------------------------------------------|-------------------------------------------------------------------------------------------------------------------------------------------------------------|-----------------------------------------------------------------------------------------------------------------------------------------------------------------------------------------|-----|
|                              |                |                                                                                                                                                                                                                                                                                          |                                                                                                                             |                                                                                                                                                                                                                                                        |                                                                                                                                                             | 4 (weak visual and auditory emotion recognition; $p = .010$ ). No association was observed with any of the other thresholds and for any of the other classes                            |     |
| Brain measures               |                |                                                                                                                                                                                                                                                                                          |                                                                                                                             |                                                                                                                                                                                                                                                        |                                                                                                                                                             |                                                                                                                                                                                         |     |
| Alemaný (2021) <sup>81</sup> | Brain measures | The sample for the polygenic score analyses consisted of 1035 Generation R children between 9 and 12 years old. Autistic traits were assessed when children were on average 6.1 years. Children (50.3% girls) were MRI scanned at an average age of 10.1 years. Participants were Dutch. | PRSice. five different P-value thresholds (PT) including $PT < 0.01$ , $PT < 0.05$ , $PT < 0.1$ , $PT < 0.5$ , and $PT < 1$ | Measures of cortical thickness and surface area obtained through structural MRI: global brain morphology measures (total brain volume, cortical gray matter volume, cerebral white matter volume, subcortical gray matter volume, cerebrospinal fluid, | Age, sex, child ethnicity, maternal education, maternal smoking and alcohol use during pregnancy, attention problems. Additional analyses with nonverbal IQ | The autism polygenic score was not significantly associated with brain correlates detected for autistic traits on the surface-based cortical measures after multiple testing correction | FDR |

|  |  |                                              |  |                                                                                                                                                                                                                                                                                                                                             |  |  |  |
|--|--|----------------------------------------------|--|---------------------------------------------------------------------------------------------------------------------------------------------------------------------------------------------------------------------------------------------------------------------------------------------------------------------------------------------|--|--|--|
|  |  | Genetic ancestry was restricted to European. |  | <p>cerebellum cortex volume, cerebellum white matter volume, amygdala volume).</p> <p>Surface-based measures: vertex-wise analyses of cortical thickness, surface area, and gyrification.</p> <p>Only global and subcortical brain measures that significantly associated with autistic traits were taken into polygenic score analyses</p> |  |  |  |
|--|--|----------------------------------------------|--|---------------------------------------------------------------------------------------------------------------------------------------------------------------------------------------------------------------------------------------------------------------------------------------------------------------------------------------------|--|--|--|

|                            |                |                                                                                                                                                                                                                                                                                                                                                                                                   |                |                                                                                                                                                                                                                                                                                                                                                              |                                                                               |                                                                                                                                              |     |
|----------------------------|----------------|---------------------------------------------------------------------------------------------------------------------------------------------------------------------------------------------------------------------------------------------------------------------------------------------------------------------------------------------------------------------------------------------------|----------------|--------------------------------------------------------------------------------------------------------------------------------------------------------------------------------------------------------------------------------------------------------------------------------------------------------------------------------------------------------------|-------------------------------------------------------------------------------|----------------------------------------------------------------------------------------------------------------------------------------------|-----|
| Ecker (2022) <sup>82</sup> | Brain measures | 360 EU-AIMS and LEAPS individuals with autism (71.9% male, mean age = 17.51, SD = 5.51) and 279 control participants (63.8% male, mean age 17.33, SD = 5.91), split into 254 typically developing participants and 25 individuals with mild intellectual disability (14 males and 11 females). Participants were British, Dutch, German and Italian. Genetic ancestry was restricted to European. | PRSice-2. 0.04 | individuals' accumulated degree of neuroanatomical atypicality summarized in a subject-level total neuroanatomical atypicality index (tAIs), which indicates the percentage of vertices outside the neurotypical PI90% (= vertex-level outliers defined as cortical thickness values falling outside of neurotypical 90% prediction interval) per individual | Four PCs, group, sex, age, age2, full-scale IQ, site, mean cortical thickness | The autism polygenic score was significantly associated with total neuro-anatomical atypicality index (tAIs: $r = 0.11$ , $p_{adj} = 0.05$ ) | FDR |
|----------------------------|----------------|---------------------------------------------------------------------------------------------------------------------------------------------------------------------------------------------------------------------------------------------------------------------------------------------------------------------------------------------------------------------------------------------------|----------------|--------------------------------------------------------------------------------------------------------------------------------------------------------------------------------------------------------------------------------------------------------------------------------------------------------------------------------------------------------------|-------------------------------------------------------------------------------|----------------------------------------------------------------------------------------------------------------------------------------------|-----|

|                          |                |                                                                                                                                                                                                                                                                                                                                                                                                                                                |                                                      |                                                                                |       |                                                                                                                                                                                                             |                         |
|--------------------------|----------------|------------------------------------------------------------------------------------------------------------------------------------------------------------------------------------------------------------------------------------------------------------------------------------------------------------------------------------------------------------------------------------------------------------------------------------------------|------------------------------------------------------|--------------------------------------------------------------------------------|-------|-------------------------------------------------------------------------------------------------------------------------------------------------------------------------------------------------------------|-------------------------|
| Gui (2021) <sup>83</sup> | Brain measures | 104 BASIS infants (51% female, mean age in months = 8.3 (1.2)) with and without a family history of autism, of which 22 without family history (11 female, mean age in months = 8.2 (1.1), 45 with family history and typical development (28 female, mean age in months = 8.2 (1.2), 20 (11 female, mean age in months = 8.5 (1.2), with family history and neurdevelopmental difficulties at age 3 but did not meet criteria for autism, and | Range of P value thresholds (.001 < threshold P ≤ 1) | Difference between face and non-face stimuli N290 latency measured through EEG | 5 PCs | Higher autism polygenic scores (threshold P = .01; Nagelkerke R <sup>2</sup> = 0.054; P = .01) was associated with shorter N290 latency to face vs nonface stimuli ( $\beta = -3.89$ ; SE = 1.94; P = .047) | Not needed, only 1 test |
|--------------------------|----------------|------------------------------------------------------------------------------------------------------------------------------------------------------------------------------------------------------------------------------------------------------------------------------------------------------------------------------------------------------------------------------------------------------------------------------------------------|------------------------------------------------------|--------------------------------------------------------------------------------|-------|-------------------------------------------------------------------------------------------------------------------------------------------------------------------------------------------------------------|-------------------------|

|                          |                                                                           |                                                                                                                                                                                                                                               |                                               |                                                                                                                                                                                                              |                  |                                                                                                                                                                                                                                           |     |
|--------------------------|---------------------------------------------------------------------------|-----------------------------------------------------------------------------------------------------------------------------------------------------------------------------------------------------------------------------------------------|-----------------------------------------------|--------------------------------------------------------------------------------------------------------------------------------------------------------------------------------------------------------------|------------------|-------------------------------------------------------------------------------------------------------------------------------------------------------------------------------------------------------------------------------------------|-----|
|                          |                                                                           | 14 (1 female, mean age in months = 8.1 (1.2) with family history of autism and later diagnosis of autism. Participants were British. Genetic ancestry was restricted to European.                                                             |                                               |                                                                                                                                                                                                              |                  |                                                                                                                                                                                                                                           |     |
| Gui (2022) <sup>60</sup> | Brain measures, general psychopathology, cognition and executive function | The ABCD sample consisted of 4722 (2198 female, mean age = 9.91, SD = 0.62). The UKB sample for intelligence scores consisted of 147175 participants (78561 female, mean age = 57.9, SD = 8.23) and 21523 (11180 female, mean age = 63.84, SD | Plink, Bayesian approach, no threshold needed | Cognitive measures: ABCD: NIH toolbox (consisting of 7 tasks and 3 composite scores). UKB: fluid intelligence scores.<br><br>Behavior: ABCD: CBCL subscales.<br><br><b>Brain imaging: ABCD: morphometric</b> | Age, sex, 10 PCs | Cognitive measures: Autism polygenic score was not associated with cognitive measures in ABCD ( $p \geq .804$ ). autism polygenic score was significantly positively associated with fluid intelligence in UKB ( $R^2 = 8.66E-04$ , $p =$ | FDR |



|  |  |                                                                                                                              |  |                                                                                                                                              |  |                                                                                                                                                                                                                                                                                                                                                                                                                                                                         |  |
|--|--|------------------------------------------------------------------------------------------------------------------------------|--|----------------------------------------------------------------------------------------------------------------------------------------------|--|-------------------------------------------------------------------------------------------------------------------------------------------------------------------------------------------------------------------------------------------------------------------------------------------------------------------------------------------------------------------------------------------------------------------------------------------------------------------------|--|
|  |  | <p>=7.47). ABCD participants are American and UKB participants are British. Genetic ancestry was restricted to European.</p> |  | <p><b>measures (cortical thickness, sulcal depth, are and subcortical volume), diffusion tensor imaging (DTI) and resting-state fMRI</b></p> |  | <p>5,47E-06), and females showed significantly stronger associations than males (<math>p &lt; 2.20 \times 10^{-16}</math>, <math>r = 0.87</math>). Behavior: The autism polygenic score was significantly positively associated with half of the psychiatric behaviors (10 out of 20, the strongest association with CBCL b. <b>Brain imaging: autism polygenic score did not have significant effects on cortical and subcortical structures and resting state</b></p> |  |
|--|--|------------------------------------------------------------------------------------------------------------------------------|--|----------------------------------------------------------------------------------------------------------------------------------------------|--|-------------------------------------------------------------------------------------------------------------------------------------------------------------------------------------------------------------------------------------------------------------------------------------------------------------------------------------------------------------------------------------------------------------------------------------------------------------------------|--|

|                               |                |                                                                                                                                                                                                               |                                                 |                                                                                                                                                         |                                                              | <b>fMRI functions in ABCD nor IDPs in UKB</b>                                                                                                                                                  |     |
|-------------------------------|----------------|---------------------------------------------------------------------------------------------------------------------------------------------------------------------------------------------------------------|-------------------------------------------------|---------------------------------------------------------------------------------------------------------------------------------------------------------|--------------------------------------------------------------|------------------------------------------------------------------------------------------------------------------------------------------------------------------------------------------------|-----|
| Jansen (2019) <sup>84</sup>   | Brain measures | 1138 Generation R participants (mean age = 10.2 years, range = 8.72 – 11.99, 50.6% boys). Participants were Dutch. Genetic ancestry was restricted to European.                                               | Plink. P = .1                                   | FA and MD, measured using diffusion tensor imaging in MRI. Confirmatory factor analysis was applied to model a single latent factor of global FA and MD | Age, sex, 4 PCs                                              | The autism polygenic score was not associated with global FA ( $p \geq .00998$ ) or MD ( $p \geq .21$ ), nor tract-specific FA ( $p \geq .00860$ ) or MD ( $p \geq .20$ )                      | FDR |
| Lawrence (2022) <sup>85</sup> | Brain measures | The total number of participants was 127, of whom 30 boys with autism (mean age = 13.45, SD = 2.99), 38 typically developing boys (mean age = 13.69, SD = 2.82), 31 girls with autism (mean age = 13.73, SD = | Plink. P 0.5. Sensitivity analyses with LDpred. | Intrinsic functional connectivity of the salience network measured using MRI                                                                            | site/scanner, full-scale IQ, age. Sex as a grouping variable | Youth with autism displayed increasing salience network connectivity with the postcentral gyrus as a function of increasing polygenic risk (MNI peak coordinates: 46, -28, 38 $\beta = 0.43$ ; |     |

|  |  |                                                                                                                                                        |  |  |  |                                                                                                                                                                                                                                                                                                                                                                                                                                                 |  |
|--|--|--------------------------------------------------------------------------------------------------------------------------------------------------------|--|--|--|-------------------------------------------------------------------------------------------------------------------------------------------------------------------------------------------------------------------------------------------------------------------------------------------------------------------------------------------------------------------------------------------------------------------------------------------------|--|
|  |  | <p>2.45) and 28 typically developing girls (mean age = 12.41, SD = 2.95). Participants were American. Genetic ancestry was restricted to European.</p> |  |  |  | <p>max Z: 4.01). Collapsing across the male and female autism groups, youth with autism as a whole displayed increasing salience network connectivity with the postcentral gyrus as a function of increasing polygenic risk (MNI peak coordinates: 46, -28, 38 <math>\beta = 0.43</math>; max Z: 4.01). Increasing genetic risk in the TD group was associated with stronger connectivity between the salience network and precentral gyrus</p> |  |
|--|--|--------------------------------------------------------------------------------------------------------------------------------------------------------|--|--|--|-------------------------------------------------------------------------------------------------------------------------------------------------------------------------------------------------------------------------------------------------------------------------------------------------------------------------------------------------------------------------------------------------------------------------------------------------|--|

|                            |                |                                                                                                                                                                                                           |                                  |                               |              |                                                                                                                                                                                                                                          |                       |
|----------------------------|----------------|-----------------------------------------------------------------------------------------------------------------------------------------------------------------------------------------------------------|----------------------------------|-------------------------------|--------------|------------------------------------------------------------------------------------------------------------------------------------------------------------------------------------------------------------------------------------------|-----------------------|
|                            |                |                                                                                                                                                                                                           |                                  |                               |              | (MNI peak coordinates: -2, -18, 62; $\beta = 0.45$ ; max Z: 4.06), as well as weaker connectivity with the inferior temporal gyrus (MNI peak polygenic load (Fig. 2B; MNI peak coordinates: 46, -16, -32; $\beta = 0.55$ ; max Z: 4.24). |                       |
| Mason (2022) <sup>86</sup> | Brain measures | Polygenic score analyses were performed on 198 LEAP individuals with autism (mean age = 17.0, SD = 5.6, 27% females) and 133 controls (mean age = 17.5, SD = 5.7, 36% female). Participants were British, | PRSice. Threshold not described. | N170 latency to face response | Not reported | Longer N170 latency was associated with higher polygenic score for autism (33) (Fig. 2C; Spearman's $r^2 = 0.026$ ; $P = 0.0031$ ; participants with autism $r^2 = 0.022$ ; $P = 0.039$ ; controls $r$                                   | Bonferroni correction |

|                          |                                |                                                                                                                                                      |                                                |                                                                                                                                                                                                                                                                                   |                                                                                                                                                                                                                    |                                                                                                                                                                                                                                                                                                                                                 |     |
|--------------------------|--------------------------------|------------------------------------------------------------------------------------------------------------------------------------------------------|------------------------------------------------|-----------------------------------------------------------------------------------------------------------------------------------------------------------------------------------------------------------------------------------------------------------------------------------|--------------------------------------------------------------------------------------------------------------------------------------------------------------------------------------------------------------------|-------------------------------------------------------------------------------------------------------------------------------------------------------------------------------------------------------------------------------------------------------------------------------------------------------------------------------------------------|-----|
|                          |                                | German, Dutch, or Italian. Genetic ancestry was restricted to European.                                                                              |                                                |                                                                                                                                                                                                                                                                                   |                                                                                                                                                                                                                    | 2 = 0.024; P = 0.074)                                                                                                                                                                                                                                                                                                                           |     |
| Sha (2021) <sup>87</sup> | Brain measures, phe-WAS, other | 32,256 UKB participants (15,288 male, mean age = 63.77, range 45-81). Participants were British. Genetic ancestry was restricted to "White British". | PRS-CS. Bayesian approach, no threshold needed | 42 brain asymmetry in regional cortical surface area, cortical thickness, and subcortical volumes derived from T1-weighted MRI scans. Unilateral brain regional measures, functional annotations of brain regions, handedness, sex. In addition, phe-WAS on 3238 outcome measures | age, nonlinear age computed as (age-mean_age) <sup>2</sup> , 10 PCs, X-, Y-, and Z-scanner position parameters, T1 signal-to-noise ratio, T1 contrast-to-noise ratio, assessment center, genotyping array, and sex | The autism polygenic score showed a significant multivariate association with the 42 regional brain asymmetry indexes, canonical correlation r = 0.03, p = 2.17 × 10 <sup>-9</sup> (N = 32,256). Functional annotation showed 19 term-based correlations >0.2: Word, phonological, language, reading, lexical, demands, semantic, orthographic, | FDR |

|  |  |  |  |  |  |                                                                                                                                                                                                                                                                                                                                                                                                                                                       |  |
|--|--|--|--|--|--|-------------------------------------------------------------------------------------------------------------------------------------------------------------------------------------------------------------------------------------------------------------------------------------------------------------------------------------------------------------------------------------------------------------------------------------------------------|--|
|  |  |  |  |  |  | <p>autism, linguistic, sentences, comprehension, working memory, working, syntactic, verb, visual word, english and word form. Sex was associated with autism polygenic score (N = 32,256, t = 3.55, p = 3.84 × 10<sup>-4</sup>). non-right-handedness was positively associated with autism polygenic score vs. right-handedness, β = 0.05, p = 0.004. No associations were found with unilateral brain measures (p &gt; .0304). Phe-WAS: out of</p> |  |
|--|--|--|--|--|--|-------------------------------------------------------------------------------------------------------------------------------------------------------------------------------------------------------------------------------------------------------------------------------------------------------------------------------------------------------------------------------------------------------------------------------------------------------|--|

|  |  |  |  |  |  |                                                                                                                                                                                                                                                                                                                                                                                                                                                                                                                                                                                           |  |
|--|--|--|--|--|--|-------------------------------------------------------------------------------------------------------------------------------------------------------------------------------------------------------------------------------------------------------------------------------------------------------------------------------------------------------------------------------------------------------------------------------------------------------------------------------------------------------------------------------------------------------------------------------------------|--|
|  |  |  |  |  |  | <p>3238 outcome measures, autism polygenic score only association with “Hearing difficulty/problems with background noise” (N = 31,728, <math>\beta = 0.06</math>, adjusted p = <math>2.7 \times 10^{-3}</math> ), “Townsend deprivation index at recruitment” (N = 32,229, <math>\beta = 0.03</math>, adjusted p = <math>2.75 \times 10^{-3}</math> ), “Qualifications: College or University degree” (N = 32,054, <math>\beta = 0.05</math>, adjusted p = <math>5.55 \times 10^{-3}</math> ) and “Long-standing illness, disability or infirmity” (N = 31,751, <math>\beta =</math></p> |  |
|--|--|--|--|--|--|-------------------------------------------------------------------------------------------------------------------------------------------------------------------------------------------------------------------------------------------------------------------------------------------------------------------------------------------------------------------------------------------------------------------------------------------------------------------------------------------------------------------------------------------------------------------------------------------|--|

|                          |                                                                           |                                                                                                                                                                                                                                                                                                          |                                                                                                                                 |                                                                                                           |                                                                    |                                                                                                                                                                                                                                                                                                                                                                                                     |            |
|--------------------------|---------------------------------------------------------------------------|----------------------------------------------------------------------------------------------------------------------------------------------------------------------------------------------------------------------------------------------------------------------------------------------------------|---------------------------------------------------------------------------------------------------------------------------------|-----------------------------------------------------------------------------------------------------------|--------------------------------------------------------------------|-----------------------------------------------------------------------------------------------------------------------------------------------------------------------------------------------------------------------------------------------------------------------------------------------------------------------------------------------------------------------------------------------------|------------|
|                          |                                                                           |                                                                                                                                                                                                                                                                                                          |                                                                                                                                 |                                                                                                           |                                                                    | 0.06, adjusted p = $1.53 \times 10^{-2}$ )                                                                                                                                                                                                                                                                                                                                                          |            |
| Qin (2020) <sup>58</sup> | Specific psychiatric classifications, brain measures, Emotion recognition | Total sample of 345 participants. Patients with schizophrenia (n = 121) mean age at scan = 24.24 (SD = 9.03), 36 male. Healthy controls (n = 224) mean age at scan = 34.71 (SD = 12.69), 83 male. Of these, 116 with schizophrenia and 212 controls were taken into analyses. Participants were Chinese. | PRSice. 103 PT (ranging from 0 to 0.5 with increments of 0.005, plus 10 <sup>-5</sup> , 10 <sup>-4</sup> , and 10 <sup>-3</sup> | <b>MRI.</b> Facial emotion recognition (Chinese Facial Affective Picture System). Schizophrenia diagnosis | Age, sex, education, disease status, and the first four components | <b>Positive correlation between autism polygenic score and ALFF in left amygdala in the total sample of schizophrenia cases and controls (r = 0.2122, Puncorrected = 0.0002483, Pcorrected = 0.022).</b> Negative correlation of autism polygenic score with negative emotion recognition (r = -0.2288, Puncorrected = 0.000149, Pcorrected = 0.0006). No associations with other brain regions nor | Bonferroni |



|                              |         |                                                                                                                                                                               |                                                  |                                                                                                                                                    |                  |                                                                                                                                                                                                          |                                                                 |
|------------------------------|---------|-------------------------------------------------------------------------------------------------------------------------------------------------------------------------------|--------------------------------------------------|----------------------------------------------------------------------------------------------------------------------------------------------------|------------------|----------------------------------------------------------------------------------------------------------------------------------------------------------------------------------------------------------|-----------------------------------------------------------------|
|                              |         |                                                                                                                                                                               |                                                  |                                                                                                                                                    |                  | types of emotion recognition were found. No significant associations were observed between the autism polygenic score and schizophrenia at different p value thresholds ( $p \geq .368$ )                |                                                                 |
| Phe-was                      |         |                                                                                                                                                                               |                                                  |                                                                                                                                                    |                  |                                                                                                                                                                                                          |                                                                 |
| Leppert (2020) <sup>88</sup> | Phe-WAS | 334,976 UKB participants were included in this study with an average age of 56 (SD = 8) years. Participants were British. Genetic ancestry was restricted to "White British". | PGS method not described. $p < 5 \times 10^{-8}$ | 23,004 outcomes including lifestyle and environment, socio-demographic, early life factors, anthropometry, family history and depression outcomes. | Age, sex, 10 PCs | In a Phe-WAS of 23004 measures, autism polygenic score was strongly associated with 10 outcomes: Red blood cell (erythrocyte) distribution width, comparative body size at age 10, Standing height, heel | Spectral decomposition: $p < 2.55 \times 10^{-6}$ (0.05/19,645) |

|                          |                                |                                                                                                                                                      |                                                |                                                                                                                                                                                                                                                                  |                                                                                                                                                                                                              |                                                                                                                                                                                                                                                                          |     |
|--------------------------|--------------------------------|------------------------------------------------------------------------------------------------------------------------------------------------------|------------------------------------------------|------------------------------------------------------------------------------------------------------------------------------------------------------------------------------------------------------------------------------------------------------------------|--------------------------------------------------------------------------------------------------------------------------------------------------------------------------------------------------------------|--------------------------------------------------------------------------------------------------------------------------------------------------------------------------------------------------------------------------------------------------------------------------|-----|
|                          |                                |                                                                                                                                                      |                                                |                                                                                                                                                                                                                                                                  |                                                                                                                                                                                                              | broadband ultrasound attenuation, heel bone mineral density, suffer from 'nerves', heel quantitative ultrasound index, heel bone mineral density, platelet distribution width                                                                                            |     |
| Sha (2021) <sup>87</sup> | Brain measures, phe-WAS, other | 32,256 UKB participants (15,288 male, mean age = 63.77, range 45-81). Participants were British. Genetic ancestry was restricted to "White British". | PRS-CS. Bayesian approach, no threshold needed | 42 brain asymmetry in regional cortical surface area, cortical thickness, and subcortical volumes derived from T1-weighted MRI scans. Unilateral brain regional measures, functional annotations of brain regions, handedness, sex. In addition, phe-WAS on 3238 | age, nonlinear age computed as $(age - mean\_age)^2$ , 10 PCs, X-, Y-, and Z-scanner position parameters, T1 signal-to-noise ratio, T1 contrast-to-noise ratio, assessment center, genotyping array, and sex | <b>The autism polygenic score showed a significant multivariate association with the 42 regional brain asymmetry indexes, canonical correlation <math>r = 0.03</math>, <math>p = 2.17 \times 10^{-9}</math> (N = 32,256). Functional annotation showed 19 term-based</b> | FDR |

|  |  |  |  |                  |  |                                                                                                                                                                                                                                                                                                                                                                                                                                |  |
|--|--|--|--|------------------|--|--------------------------------------------------------------------------------------------------------------------------------------------------------------------------------------------------------------------------------------------------------------------------------------------------------------------------------------------------------------------------------------------------------------------------------|--|
|  |  |  |  | outcome measures |  | <p><b>correlations &gt;0.2: Word, phonological, language, reading, lexical, demands, semantic, orthographic, autism, linguistic, sentences, comprehension, working memory, working, syntactic, verb, visual word, english and word form. Sex was associated with autism polygenic score (N = 32,256, t = 3.55, p = 3.84 × 10<sup>-4</sup>). non-right-handedness was positively associated with autism polygenic score</b></p> |  |
|--|--|--|--|------------------|--|--------------------------------------------------------------------------------------------------------------------------------------------------------------------------------------------------------------------------------------------------------------------------------------------------------------------------------------------------------------------------------------------------------------------------------|--|

|  |  |  |  |  |  |                                                                                                                                                                                                                                                                                                                                                                                                                                                                                                                                               |  |
|--|--|--|--|--|--|-----------------------------------------------------------------------------------------------------------------------------------------------------------------------------------------------------------------------------------------------------------------------------------------------------------------------------------------------------------------------------------------------------------------------------------------------------------------------------------------------------------------------------------------------|--|
|  |  |  |  |  |  | <p>vs. right-handedness, <math>\beta = 0.05</math>, <math>p = 0.004</math>. No associations were found with unilateral brain measures (<math>p &gt; .0304</math>). Phe-WAS: out of 3238 outcome measures, autism polygenic score only association with “Hearing difficulty/problems with background noise” (<math>N = 31,728</math>, <math>\beta = 0.06</math>, adjusted <math>p = 2.7 \times 10^{-3}</math>), “Townsend deprivation index at recruitment” (<math>N = 32,229</math>, <math>\beta = 0.03</math>, adjusted <math>p =</math></p> |  |
|--|--|--|--|--|--|-----------------------------------------------------------------------------------------------------------------------------------------------------------------------------------------------------------------------------------------------------------------------------------------------------------------------------------------------------------------------------------------------------------------------------------------------------------------------------------------------------------------------------------------------|--|

|                            |         |                                                                                                                                                                                                         |                                                       |                                   |                  |                                                                                                                                                                                                                                                                                                                                                                                                                  |                                  |
|----------------------------|---------|---------------------------------------------------------------------------------------------------------------------------------------------------------------------------------------------------------|-------------------------------------------------------|-----------------------------------|------------------|------------------------------------------------------------------------------------------------------------------------------------------------------------------------------------------------------------------------------------------------------------------------------------------------------------------------------------------------------------------------------------------------------------------|----------------------------------|
|                            |         |                                                                                                                                                                                                         |                                                       |                                   |                  | <b><math>2.75 \times 10^{-3}</math> ),<br/> “Qualifications<br/> : College or<br/> University<br/> degree” (N =<br/> 32,054, <math>\beta</math> =<br/> 0.05, adjusted<br/> p = <math>5.55 \times 10^{-3}</math><br/> ) and “Long-<br/> standing<br/> illness,<br/> disability or<br/> infirmity” (N =<br/> 31,751, <math>\beta</math> =<br/> 0.06, adjusted<br/> p = <math>1.53 \times 10^{-2}</math><br/> )</b> |                                  |
| Wendt (2020) <sup>89</sup> | Phe-WAS | The total sample with available phenotype data included in the phe-WAS consisted of 311 children between 8-10 years (55.9% male), 491 children between 11 and 17 years (47.9% male) and 324 18 and over | PRSice. P = 0.0001 to p = 1 in 0.000005 increasements | 491 neurodevelopmental phenotypes | Age, sex, 10 PCs | The autism polygenic score was significantly associated with the emotional intelligence phenotype PEITANG (Penn Emotional Identification Test (PEIT) recognition of angry emotions;                                                                                                                                                                                                                              | FDR + Bonferroni (P < 3.63x10-6) |

|  |  |                                                                                                       |  |  |  |                                                                                                                                                                                                                                                                                                                                                                                                                                                                                                                                                                                                              |  |
|--|--|-------------------------------------------------------------------------------------------------------|--|--|--|--------------------------------------------------------------------------------------------------------------------------------------------------------------------------------------------------------------------------------------------------------------------------------------------------------------------------------------------------------------------------------------------------------------------------------------------------------------------------------------------------------------------------------------------------------------------------------------------------------------|--|
|  |  | (44.5% male).<br>Participants<br>were American.<br>Genetic ancestry<br>was restricted to<br>European. |  |  |  | z-score = 5.28,<br>R2 = 1.06%, p =<br>1.38 × 10 <sup>-7</sup> , P-<br>value threshold<br>= 0.4487) in<br>children aged<br>11-17 years old.<br>In models<br>covaried for<br>angry emotion<br>recognition,<br>autism PRS was<br>significantly<br>associated with<br>the ability to<br>recognize<br>happiness (z-<br>score = -2.41,<br>R2 = 0.221%, p<br>= 0.016, pdiff =<br>6.41 × 10 <sup>-4</sup> )<br>and neutral<br>emotions (z-<br>score = -2.05,<br>R2 = 0.159%, p<br>= 0.041, pdiff =<br>0.433; Fig 3).<br>autism PRS was<br>associated with<br>reaction time for<br>anger trials (z-<br>score = -2.08, |  |
|--|--|-------------------------------------------------------------------------------------------------------|--|--|--|--------------------------------------------------------------------------------------------------------------------------------------------------------------------------------------------------------------------------------------------------------------------------------------------------------------------------------------------------------------------------------------------------------------------------------------------------------------------------------------------------------------------------------------------------------------------------------------------------------------|--|

|                             |                                         |                                                                                                                                                                                                                                                                                    |                                         |                                                               |                                           |                                                                                                                                                                                         |                       |
|-----------------------------|-----------------------------------------|------------------------------------------------------------------------------------------------------------------------------------------------------------------------------------------------------------------------------------------------------------------------------------|-----------------------------------------|---------------------------------------------------------------|-------------------------------------------|-----------------------------------------------------------------------------------------------------------------------------------------------------------------------------------------|-----------------------|
|                             |                                         |                                                                                                                                                                                                                                                                                    |                                         |                                                               |                                           | R2 = 0.138%, p = 0.038), fear trials (z-score = -2.06, R2 = 0.161%, p = 0.018), and happy trials (z-score = 2.21, R2 = 0.356%, p = 0.027                                                |                       |
| Other                       |                                         |                                                                                                                                                                                                                                                                                    |                                         |                                                               |                                           |                                                                                                                                                                                         |                       |
| Cullen (2021) <sup>68</sup> | Cognition and executive function, other | The sample included 4,934 individuals. Of these, 1,858 were from monozygotic twin pairs and 3,076 were from dizygotic twin pairs (1,596 same-sex pairs and 1,480 opposite-sex pairs). Participants were born between 1994 and 1996 and were British or Welsh. Genetic ancestry was | LDpred. No threshold, Bayesian approach | <b>Gestational age at birth</b> and cognition at four (PARCA) | 5 PCs, genotype chip, plate, sex, and SES | <b>The autism polygenic score was not significantly associated with gestational age at birth (b = -.012, SE = .014, p = .384) or cognition at age 4 (b = .007, SE = .014, p = .614)</b> | Bonferroni correction |

|                            |                         |                                                                                                                                                                                                                                          |                                                             |                                                                                                                                                                                  |                                 |                                                                                                                                                                                                     |              |
|----------------------------|-------------------------|------------------------------------------------------------------------------------------------------------------------------------------------------------------------------------------------------------------------------------------|-------------------------------------------------------------|----------------------------------------------------------------------------------------------------------------------------------------------------------------------------------|---------------------------------|-----------------------------------------------------------------------------------------------------------------------------------------------------------------------------------------------------|--------------|
|                            |                         | restricted to European.                                                                                                                                                                                                                  |                                                             |                                                                                                                                                                                  |                                 |                                                                                                                                                                                                     |              |
| Debst (2022) <sup>32</sup> | Autism diagnosis, other | A total of 22153 iPsych participants were included in the analyses, 10890 of whom were female. Participants were assessed at ages $\geq 5$ and $\geq 10$ . Participants were all Danish and genetic ancestry was restricted to European. | LDpred and BOLT-LMM. Bayesian approach, no threshold needed | First diagnosis of autism at age $\geq 5$ . <b>Diagnoses of early childhood infection according to ICD-8 or ICD-10, including viral, bacterial, fungal, and other infections</b> | Sex, calendar period and 10 PCs | The autism polygenic score was significantly associated with autism diagnosis (HR = 1.34, 95% CI, 1.30–1.38) <b>and it showed mixed associations with odds of infection in different quartiles.</b> | Not reported |



|                              |                                                                 |                                                                                                                                                                                                                                                                                                                                     |                                                                                                                                                                                  |                                                                                      |                                                                                                                                                                                                                                        |                                                                                                                                                                                                                                                                                                                                                                                                                                                   |                        |
|------------------------------|-----------------------------------------------------------------|-------------------------------------------------------------------------------------------------------------------------------------------------------------------------------------------------------------------------------------------------------------------------------------------------------------------------------------|----------------------------------------------------------------------------------------------------------------------------------------------------------------------------------|--------------------------------------------------------------------------------------|----------------------------------------------------------------------------------------------------------------------------------------------------------------------------------------------------------------------------------------|---------------------------------------------------------------------------------------------------------------------------------------------------------------------------------------------------------------------------------------------------------------------------------------------------------------------------------------------------------------------------------------------------------------------------------------------------|------------------------|
| Hannon (2018) <sup>33</sup>  | Autism diagnosis, Other                                         | Minerva cohort, a subset of 1316 iPsych samples, including an equal number of autism cases (52% male, mean gestational age = 39.6 (1.82)) and controls (49.8% male, mean gestational age = 39.6 (1.2)). Birth years for cases and controls range from 1998 to 2002. Participants are all Danish. Genetic ancestry was not reported. | Plink. Ten different significance thresholds (pT) from $5 \times 10^{-8}$ to 1 to identify the optimal set of SNPs with the largest difference between autism cases and controls | <b>DNA methylation from neonatal dried blood samples.</b> Autism diagnosis.          | the number of non-missing genotypes contributing to the polygenic score, the first five genetic principal components, sex, experimental array number, six cell composition variables, smoking score, gestational age, and birth weight | <b>The autism polygenic score significantly associated with two DMPs (cg02771117, <math>P = 3.14 \times 10^{-8}</math>; cg27411982, <math>P = 8.38 \times 10^{-8}</math>) at <math>P &lt; 1 \times 10^{-7}</math> and 49 DMPs associated at a more relaxed “discovery” P value threshold (<math>P &lt; 5 \times 10^{-5}</math>).</b> The autism polygenic score also distinguished autism cases from controls ( $R^2 = 3.12\%$ , $P = 9.49E-13$ ) | $P < 1 \times 10^{-7}$ |
| Havdahl (2022) <sup>48</sup> | Specific psychiatric classifications, physical wellbeing, other | The total sample included up to 14,539 MoBa mothers (mean age = 30.00, SD = 4.45) and 14,897 fathers                                                                                                                                                                                                                                | PRSice. $P < .05$                                                                                                                                                                | <b>Pregnancy-related factors related to maternal lifestyle and health behaviors,</b> | Genotyping batch, 10 PCs                                                                                                                                                                                                               | Maternal autism polygenic score was associated with higher odds of experiencing lifetime                                                                                                                                                                                                                                                                                                                                                          | $P < .002$             |

|  |  |                                                                                                                                           |  |                                                                                                           |  |                                                                                                                                                                                                                                                                                                                                                                                                                                                                            |  |
|--|--|-------------------------------------------------------------------------------------------------------------------------------------------|--|-----------------------------------------------------------------------------------------------------------|--|----------------------------------------------------------------------------------------------------------------------------------------------------------------------------------------------------------------------------------------------------------------------------------------------------------------------------------------------------------------------------------------------------------------------------------------------------------------------------|--|
|  |  | (mean age = 32.46, SD = 5.13) depending on the outcome measure. Participants were Norwegian. Genetic ancestry was restricted to European. |  | <b>metabolism, immune system, other physical health conditions, and (indications for) medication use.</b> |  | depression (OR 1.12 (1.08 to 1.16), $p = 9.70 \times 10^{-9}$ ) and depression/anxiety symptoms (OR 1.13 (1.06 to 1.19), $p = 3.62 \times 10^{-5}$ ). Weak evidence for association with migraine (OR 1.10 (1.02 to 1.18), $p = .009$ ) and urinary tract infection (OR 1.08 (1.02 to 1.14), $p = .005$ ) during pregnancy. <b>No significant associations with other pregnancy-related factors. Paternal autism polygenic score was not significantly associated with</b> |  |
|--|--|-------------------------------------------------------------------------------------------------------------------------------------------|--|-----------------------------------------------------------------------------------------------------------|--|----------------------------------------------------------------------------------------------------------------------------------------------------------------------------------------------------------------------------------------------------------------------------------------------------------------------------------------------------------------------------------------------------------------------------------------------------------------------------|--|

|                             |       |                                                                                                                                                                                                         |                                                                                                                                                                                      |                                                                         |                                            | <b>any pregnancy-related factors measured in fathers</b>                                                                                                                                                                                                                 |                                                                                                                                              |
|-----------------------------|-------|---------------------------------------------------------------------------------------------------------------------------------------------------------------------------------------------------------|--------------------------------------------------------------------------------------------------------------------------------------------------------------------------------------|-------------------------------------------------------------------------|--------------------------------------------|--------------------------------------------------------------------------------------------------------------------------------------------------------------------------------------------------------------------------------------------------------------------------|----------------------------------------------------------------------------------------------------------------------------------------------|
| Kalman (2021) <sup>90</sup> | Other | 12,977 PGC and ConLiGen participants with bipolar disorder coming from 34 cohorts (41.41% male). Participants were European, North American or Australian. Genetic ancestry was restricted to European. | PR-CS. Six polygenic score thresholds (with $\phi = 1 \times 10^{-1}$ , $1 \times 10^{-2}$ , $1 \times 10^{-3}$ , $1 \times 10^{-4}$ , $1 \times 10^{-5}$ , and $1 \times 10^{-6}$ ) | Age at bipolar disorder onset and polarity at onset of bipolar disorder | Gender, bipolar disorder subtype and 8 PCs | Higher autism polygenic score ( $\beta = -0.34$ years per 1 s.d. increase in polygenic score, s.e. = 0.08, $P = 9.85 \times 10^{-6}$ ) was associated with an earlier age at onset of bipolar disorder, but not with polarity at onset of bipolar disorder ( $p = .14$ ) | Bonferroni correction: ( $p = 0.05 / (6 \phi \text{ thresholds} \times 8 \text{ traits} \times 2 \text{ phenotypes}) = 5.2 \times 10^{-4}$ ) |

|                                  |                         |                                                                                                                                                                                                                        |                                 |                                                                 |                                                                                                                                          |                                                                                                                                                                                                                |              |
|----------------------------------|-------------------------|------------------------------------------------------------------------------------------------------------------------------------------------------------------------------------------------------------------------|---------------------------------|-----------------------------------------------------------------|------------------------------------------------------------------------------------------------------------------------------------------|----------------------------------------------------------------------------------------------------------------------------------------------------------------------------------------------------------------|--------------|
| Khundrakpam (2020) <sup>91</sup> | Other                   | 391 PING participants (207 male, mean age = 12.1 (4.7) years, range 3.1 – 21. 86.7% European ancestry and 13.30% mixed ancestry. Participants were American. Genetic ancestry was restricted to European.              | PRSice. P = 0.001               | Age, vocabulary score, reading score                            | Age, sex, scanner and the first 20 PC                                                                                                    | The autism polygenic score was not significantly associated with age (T=1.45, p=0.14), vocabulary score (T=0.65, p=0.51) and reading score (T=0.68, p=0.49)                                                    | FDR          |
| Klei (2021) <sup>25</sup>        | Autism diagnosis, other | The total sample in the polygenic score analyses was 6,022 (3,011 matched pairs). Of the cases, 305 carried 1 or more potentially damaging variants (PDV's: 166 Copy Number Variant, 78 protein truncating variant, 61 | No threshold, Bayesian approach | Autism diagnosis and potentially damaging variant (PDV) status, | No covariates for primary case-control analysis and PDV carrier analyses. Additional analyses of PDV carrier status included 3 or 10 PCs | Autism polygenic score significantly positively associated with autism diagnosis (OR = 1.21, 95% CI 1.15 - 1.28), and negatively associated with potential damaging variant status in autism cases (OR = 0.79, | Not reported |

|                            |       |                                                                                                                                                                                                     |                                                                                                                                                         |                                                                             |                     |                                                                                                                                                                                                                                                                                  |              |
|----------------------------|-------|-----------------------------------------------------------------------------------------------------------------------------------------------------------------------------------------------------|---------------------------------------------------------------------------------------------------------------------------------------------------------|-----------------------------------------------------------------------------|---------------------|----------------------------------------------------------------------------------------------------------------------------------------------------------------------------------------------------------------------------------------------------------------------------------|--------------|
|                            |       | deleterious missense variant). Further descriptives of participant characteristics are not available. Participants were all American and ancestry was restricted to European.                       |                                                                                                                                                         |                                                                             |                     | 95% CI 0.70 - 0.89)                                                                                                                                                                                                                                                              |              |
| Klein (2022) <sup>26</sup> | Other | The total AGRE sample consists of 1,387 subjects diagnosed with autism. The sample included in the analyses consisted of 707 participants. Participants were American. 97.3% had European ancestry. | Plink. $1 \times 10^{-2}$ , $1 \times 10^{-3}$ , $1 \times 10^{-4}$ , $1 \times 10^{-5}$ , $1 \times 10^{-6}$ , $1 \times 10^{-7}$ , $5 \times 10^{-8}$ | Clusters of comorbid conditions (topics) identified through topic modelling | age, sex, and 5 PCs | The autism polygenic score was associated with Topic 6, the main allergy factor ( $R^2 = 0.0141$ , $p = 1.72 \times 10^{-3}$ ) and Topic 17 (first 5 terms: handed-right, low-acoustic, low-pain, low-tactile, abnormal-skin, diet-preferences), ( $R^2 = 0.0080$ , $p = .037$ ) | Not reported |

|                         |                        |                                                                                                                                                                                                                                                                                                                                                                                                                                                     |                                                     |                                                                                                                                                                 |                                                           |                                                                                                                                                                                                                                                                                                                |                                                         |
|-------------------------|------------------------|-----------------------------------------------------------------------------------------------------------------------------------------------------------------------------------------------------------------------------------------------------------------------------------------------------------------------------------------------------------------------------------------------------------------------------------------------------|-----------------------------------------------------|-----------------------------------------------------------------------------------------------------------------------------------------------------------------|-----------------------------------------------------------|----------------------------------------------------------------------------------------------------------------------------------------------------------------------------------------------------------------------------------------------------------------------------------------------------------------|---------------------------------------------------------|
| Li (2020) <sup>39</sup> | Autistic traits, other | 188 KONTAKT participants were included in polygenic score analyses. 99 (26 female, 56 adolescent and 43 children) participants belonged to the active social skills group training group and 89 (26 female, 60 adolescent and 29 children) received standard care 169 participants had outcome data at post-intervention, and 152 participants at follow-up. 99 (26 female) participants belonged to the active social skills group training group. | PRSice. Five Pts (<0.01, <0.05, <0.1, <0.5, and <1) | SRS at baseline. <b>Intervention outcome after social skills group training, measured by parent-reported SRS, carrier status of clinically significant CNVs</b> | Polygenic score interaction effect, age group, sex, 4 PCs | No correlation between autism polygenic score and baseline SRS ( $r = -.074$ ) <b>or carrier status of clinically significant CNVs was observed. Higher autism polygenic score was associated with inferior outcome after social skills group training at follow up (<math>\beta = 6.47, P = 0.019</math>)</b> | Multiple testing correction applied, unclear which type |
|-------------------------|------------------------|-----------------------------------------------------------------------------------------------------------------------------------------------------------------------------------------------------------------------------------------------------------------------------------------------------------------------------------------------------------------------------------------------------------------------------------------------------|-----------------------------------------------------|-----------------------------------------------------------------------------------------------------------------------------------------------------------------|-----------------------------------------------------------|----------------------------------------------------------------------------------------------------------------------------------------------------------------------------------------------------------------------------------------------------------------------------------------------------------------|---------------------------------------------------------|

|                              |       |                                                                                                                                                                                |                                               |                    |                                                  |                                                                                                                                                                                                                                                                    |                                    |
|------------------------------|-------|--------------------------------------------------------------------------------------------------------------------------------------------------------------------------------|-----------------------------------------------|--------------------|--------------------------------------------------|--------------------------------------------------------------------------------------------------------------------------------------------------------------------------------------------------------------------------------------------------------------------|------------------------------------|
|                              |       | Participants were all Swedish. Genetic ancestry was restricted to European.                                                                                                    |                                               |                    |                                                  |                                                                                                                                                                                                                                                                    |                                    |
| Maxwell (2021) <sup>92</sup> | Other | 385,793 UKB participants, of which 54% were women; age range was 37 to 73 years (mean = 56.7, SD = 8). Participants were British. Genetic ancestry was restricted to European. | Plink. Bayesian approach, no threshold needed | Population density | 20 principal components, UKB batch, age, and sex | The autism polygenic score showed significant associations with increased population density across adult life (age 25 to >65 years) ( $R^2 \geq 1.72E-04$ , $p \geq 0.000196673$ ), but not birthplace population density ( $R^2 = 3.50E-06$ , $p = 0.25410178$ ) | Bonferroni: $p = 3 \times 10^{-4}$ |

|                                           |                                             |                                                                                                                                                                                                         |                                                                                                                   |                                                                                                                                                                                                                        |                |                                                                                                                                                                                                                           |                                             |
|-------------------------------------------|---------------------------------------------|---------------------------------------------------------------------------------------------------------------------------------------------------------------------------------------------------------|-------------------------------------------------------------------------------------------------------------------|------------------------------------------------------------------------------------------------------------------------------------------------------------------------------------------------------------------------|----------------|---------------------------------------------------------------------------------------------------------------------------------------------------------------------------------------------------------------------------|---------------------------------------------|
| Morneau-Vaillancourt (2021) <sup>28</sup> | Other                                       | the final sample included 1133 QNTS and QLSCD genotyped participants                                                                                                                                    | Plink, PRS-CS Bayesian approach                                                                                   | Trajectories of social wariness (adapted from Asendorpf's scale of situational shyness among unfamiliar peers and Achenbach's TRF), stable preference for solitude (adapted from the TRF and the Child Behavior Scale) | Sex and 10 PCs | Autism polygenic score was not significantly associated with trajectories of social wariness ( $p \geq .574$ ) nor stable preference for solitude ( $p = .075$ )                                                          | Bonferroni                                  |
| Ohi (2020) <sup>57</sup>                  | Specific psychiatric classifications, other | Total sample of 131 patients with schizophrenia (50 males/81 females, mean age = 42.9, SD = 13.1 years), 57 of their unaffected first-degree relatives (41 parents/12 siblings/4 offspring, 18 males/39 | Method not reported. $PT \leq .01$ , $PT \leq .05$ , $PT \leq .1$ , $PT \leq .2$ , $PT \leq .5$ , and $PT \leq 1$ | Diagnostic status of schizophrenia, divided into three statuses: diagnosed with schizophrenia, first-degree relatives of person with schizophrenia, or healthy control                                                 | Not reported   | Lower age at onset of schizophrenia was significantly associated with higher autism polygenic score ( $PT \leq .05$ : $\beta = -0.20$ , $P = 7.13 \times 10^{-3}$ ). The autism polygenic scores were marginally lower in | Bonferroni correction: ( $\alpha = .05/5$ ) |



|  |  |                                                                                                                                                                  |  |  |  |                                                                                                                                                                                                                                                                                                                                                                                                                                                                                               |  |
|--|--|------------------------------------------------------------------------------------------------------------------------------------------------------------------|--|--|--|-----------------------------------------------------------------------------------------------------------------------------------------------------------------------------------------------------------------------------------------------------------------------------------------------------------------------------------------------------------------------------------------------------------------------------------------------------------------------------------------------|--|
|  |  | <p>females, mean age = 59.7, SD =13.6 years), and 147 HCs (98 males/49 females, mean age = 37.2, SD =14.1 years). all participants were of Japanese descent.</p> |  |  |  | <p>Japanese first-degree relatives compared with healthy controls ( maximum at <math>PT \leq .01</math>: Nagelkerke's <math>R^2 = 0.045</math>, <math>P = .013</math>) and patients with schizophrenia patients (maximum at <math>PT \leq 0.2</math>: Nagelkerke's <math>R^2 = 0.023</math>, <math>P = .084</math>), while there were no significant differences in the polygenic score for European autism between schizophrenia patients and healthy controls (<math>P &gt; .05</math>)</p> |  |
|--|--|------------------------------------------------------------------------------------------------------------------------------------------------------------------|--|--|--|-----------------------------------------------------------------------------------------------------------------------------------------------------------------------------------------------------------------------------------------------------------------------------------------------------------------------------------------------------------------------------------------------------------------------------------------------------------------------------------------------|--|

|                                       |       |                                                                                                                                                                                                                                   |                           |                                                                                                                                                                                                                                                      |                                                 |                                                                                                                                                                                                                                                                          |              |
|---------------------------------------|-------|-----------------------------------------------------------------------------------------------------------------------------------------------------------------------------------------------------------------------------------|---------------------------|------------------------------------------------------------------------------------------------------------------------------------------------------------------------------------------------------------------------------------------------------|-------------------------------------------------|--------------------------------------------------------------------------------------------------------------------------------------------------------------------------------------------------------------------------------------------------------------------------|--------------|
| Peel (2022) <sup>93</sup>             | Other | The sample included 3,963 TEDS individuals (62% female). Data were collected at age 21. Participants were English or Welsh. Genetic ancestry was restricted to European.                                                          | LDpred. Bayesian approach | Retrospectively self-reported childhood trauma (derived from the Avon Longitudinal Study of Parents and Children 'Life at 22+' questionnaire)                                                                                                        | birth year, gender and genotyping batch, 10 PCs | The autism polygenic score was significantly associated with retrospectively self-reported childhood trauma (B = .7, SE = .15, p = .00)                                                                                                                                  | FDR          |
| Ratanatharathorn (2021) <sup>94</sup> | Other | NHS2 participants. The sample differed per outcome measure. Physical/emotional abuse: N = 11315, mean age = 46.6 (4.409). Physical assault: N 11322, mean age = 46.6 (4.409). Sexual abuse: N = 11317, mean age = 46.596 (4.410). | PRSice. P = .1            | Childhood abuse, including physical/emotional abuse (Five questions from the Physical and Emotional Abuse Subscale of the Childhood Trauma Questionnaire (CTQ)), Physical assault before age 18 (Revised Conflict Tactics scale (CTS)), sexual abuse | Highest education completed by parents, 10 PCs  | one-standard-deviation increase in the autism polygenic score was associated with an increased risk of experiencing physical/emotional abuse (OR = 1.05, 95% CI = 1.02, 1.09, p = .0024) and physical assault (OR = 1.06, 95% CI = 1.03, 1.1, p = .00041) but not sexual | Not reported |

|                          |                                |                                                                                                                                                      |                                                |                                                                                                                                                                                                                                                                     |                                                                                                                                                                                                                    |                                                                                                                                                                                                                                             |     |
|--------------------------|--------------------------------|------------------------------------------------------------------------------------------------------------------------------------------------------|------------------------------------------------|---------------------------------------------------------------------------------------------------------------------------------------------------------------------------------------------------------------------------------------------------------------------|--------------------------------------------------------------------------------------------------------------------------------------------------------------------------------------------------------------------|---------------------------------------------------------------------------------------------------------------------------------------------------------------------------------------------------------------------------------------------|-----|
|                          |                                | Participants were American. Genetic ancestry was restricted to European.                                                                             |                                                | (Sexual Maltreatment Scale of the Conflict Tactics Scales)                                                                                                                                                                                                          |                                                                                                                                                                                                                    | abuse (OR = 1.03, 95% CI = 1.00, 1.07, p = .088)                                                                                                                                                                                            |     |
| Sha (2021) <sup>87</sup> | Brain measures, phe-WAS, other | 32,256 UKB participants (15,288 male, mean age = 63.77, range 45-81). Participants were British. Genetic ancestry was restricted to "White British". | PRS-CS. Bayesian approach, no threshold needed | 42 brain asymmetry in regional cortical surface area, cortical thickness, and subcortical volumes derived from T1-weighted MRI scans. Unilateral brain regional measures, <b>functional annotations of brain regions, handedness, sex</b> . In addition, phe-WAS on | age, nonlinear age computed as (age-mean_age) <sup>2</sup> , 10 PCs, X-, Y-, and Z-scanner position parameters, T1 signal-to-noise ratio, T1 contrast-to-noise ratio, assessment center, genotyping array, and sex | The autism polygenic score showed a significant multivariate association with the 42 regional brain asymmetry indexes, canonical correlation r = 0.03, p = 2.17 × 10 <sup>-9</sup> (N = 32,256). Functional annotation showed 19 term-based | FDR |

|  |  |  |  |                       |  |                                                                                                                                                                                                                                                                                                                                                                                                                                 |  |
|--|--|--|--|-----------------------|--|---------------------------------------------------------------------------------------------------------------------------------------------------------------------------------------------------------------------------------------------------------------------------------------------------------------------------------------------------------------------------------------------------------------------------------|--|
|  |  |  |  | 3238 outcome measures |  | <p>correlations &gt;0.2: <b>Word, phonological, language, reading, lexical, demands, semantic, orthographic, autism, linguistic, sentences, comprehension, working memory, working, syntactic, verb, visual word, english and word form. Sex was associated with autism polygenic score (N = 32,256, t = 3.55, p = 3.84 × 10<sup>-4</sup> ). non-right-handedness was positively associated with autism polygenic score</b></p> |  |
|--|--|--|--|-----------------------|--|---------------------------------------------------------------------------------------------------------------------------------------------------------------------------------------------------------------------------------------------------------------------------------------------------------------------------------------------------------------------------------------------------------------------------------|--|

|  |  |  |  |  |  |                                                                                                                                                                                                                                                                                                                                                                                                                                                                                                                                                                                                        |  |
|--|--|--|--|--|--|--------------------------------------------------------------------------------------------------------------------------------------------------------------------------------------------------------------------------------------------------------------------------------------------------------------------------------------------------------------------------------------------------------------------------------------------------------------------------------------------------------------------------------------------------------------------------------------------------------|--|
|  |  |  |  |  |  | <p><b>vs. right-handedness, <math>\beta = 0.05</math>, <math>p = 0.004</math>.</b> No associations were found with unilateral brain measures (<math>p &gt; .0304</math>). Phe-WAS: out of 3238 outcome measures, autism polygenic score only association with “Hearing difficulty/problems with background noise” (<math>N = 31,728</math>, <math>\beta = 0.06</math>, adjusted <math>p = 2.7 \times 10^{-3}</math>), “Townsend deprivation index at recruitment” (<math>N = 32,229</math>, <math>\beta = 0.03</math>, adjusted <math>p = 2.75 \times 10^{-3}</math>), “Qualifications: College or</p> |  |
|--|--|--|--|--|--|--------------------------------------------------------------------------------------------------------------------------------------------------------------------------------------------------------------------------------------------------------------------------------------------------------------------------------------------------------------------------------------------------------------------------------------------------------------------------------------------------------------------------------------------------------------------------------------------------------|--|

|                            |       |                                                                                                                                                                                                                                                             |               |                                                                                                                          |                                                                                                                                                                  |                                                                                                                                                                                                               |                                               |
|----------------------------|-------|-------------------------------------------------------------------------------------------------------------------------------------------------------------------------------------------------------------------------------------------------------------|---------------|--------------------------------------------------------------------------------------------------------------------------|------------------------------------------------------------------------------------------------------------------------------------------------------------------|---------------------------------------------------------------------------------------------------------------------------------------------------------------------------------------------------------------|-----------------------------------------------|
|                            |       |                                                                                                                                                                                                                                                             |               |                                                                                                                          |                                                                                                                                                                  | University degree” (N = 32,054, $\beta$ = 0.05, adjusted p = $5.55 \times 10^{-3}$ ) and “Long-standing illness, disability or infirmity” (N = 31,751, $\beta$ = 0.06, adjusted p = $1.53 \times 10^{-2}$ )   |                                               |
| Strom (2022) <sup>95</sup> | Other | Seven different European-ancestry cohorts (STR-CATTS15, 50% female, mean age = 15.47 (SD = 0.36), STR-CATSS18, 56% female, mean age = 18.56 (SD = 0.33), STR-CATSS24, 57% female, mean age = 23.84 (SD = 0.32), STR YATSS, 63% female, mean age = 23.93 (SD | PRSice. P = 1 | Hoarding symptoms (Hoarding Rating Scale Self-Report (HRS-SR) or 2 items from Toronto Obsessive Compulsive Scale (TOCS)) | Genetic relatedness matrix, sex, age, respondent (parent vs. child reporting), genotyping array, principal components 1–3 and projected principal components 1–3 | Meta-analyzed autism polygenic score was associated with hoarding symptoms when heterogeneity of individual polygenic score was not taken into account (Pfixed = 0.00426) (heterogeneity was not significant) | Bonferroni correction: $p < 0.05/7 = 0.00714$ |

|  |  |                                                                                                                                                                                                                                                                                                                                   |  |  |  |  |  |
|--|--|-----------------------------------------------------------------------------------------------------------------------------------------------------------------------------------------------------------------------------------------------------------------------------------------------------------------------------------|--|--|--|--|--|
|  |  | <p>= 1.78), NTR, 66% female, mean age = 41.49 (Sd = 15.19), SfS, 48% female, mean age = 10.92 (SD = 2.79), TwinsUK, 92% female, mean age = 56.7 (SD = 12.6). Total sample for autism polygenic score analysis, n= 25,977. Participants were Swedish, Dutch, American of British. Genetic ancestry was restricted to European.</p> |  |  |  |  |  |
|--|--|-----------------------------------------------------------------------------------------------------------------------------------------------------------------------------------------------------------------------------------------------------------------------------------------------------------------------------------|--|--|--|--|--|

|                             |                                                          |                                                                                                                                                                                                                                                                                |                |                                                                                                                                                                                                                                    |                                              |                                                                                                                                                                                                                                                                                                                                                                                                                                                                                                            |               |
|-----------------------------|----------------------------------------------------------|--------------------------------------------------------------------------------------------------------------------------------------------------------------------------------------------------------------------------------------------------------------------------------|----------------|------------------------------------------------------------------------------------------------------------------------------------------------------------------------------------------------------------------------------------|----------------------------------------------|------------------------------------------------------------------------------------------------------------------------------------------------------------------------------------------------------------------------------------------------------------------------------------------------------------------------------------------------------------------------------------------------------------------------------------------------------------------------------------------------------------|---------------|
| Torske (2019) <sup>47</sup> | Autistic traits, Cognition and executive function, other | The sample consisted of 176 BUPGEN children, adolescents, and young adults who were referred to a specialized hospital unit for NDs for evaluation of autism (76.1% boys, mean age = 11.7, SD = 3.7. Participants were Norwegian. Genetic ancestry was restricted to European. | Plink. P = 0.1 | Social function (SRS), executive function (Behavior rating inventory of executive function (BRIEFF)), including subscales (Behavior Regulation Index, Metacognition Index, Global Executive Composite), parental educational level | Age, sex, SRS scores, full-scale IQ, and PCs | The autism polygenic score differentiated between the typically developing children (TDC) and the clinical group (autism and subthreshold autism group, n = 176; t(203) = 2.61, 95% CI [1.2 × 10 <sup>-5</sup> , 8.7 × 10 <sup>-5</sup> ], P = 0.010. The polygenic score for autism also differentiated between the TDC and both the subthreshold autism group; t(83) = -2.07, 95% CI [-8.6 × 10 <sup>-5</sup> , -1.7 × 10 <sup>-6</sup> ], P = 0.042 and the autism group t(147) = -2.63, 95% CI [-9.1 × | No correction |
|-----------------------------|----------------------------------------------------------|--------------------------------------------------------------------------------------------------------------------------------------------------------------------------------------------------------------------------------------------------------------------------------|----------------|------------------------------------------------------------------------------------------------------------------------------------------------------------------------------------------------------------------------------------|----------------------------------------------|------------------------------------------------------------------------------------------------------------------------------------------------------------------------------------------------------------------------------------------------------------------------------------------------------------------------------------------------------------------------------------------------------------------------------------------------------------------------------------------------------------|---------------|



|  |  |  |  |  |  |                                                                                                                                                                                                                                                                                                                                                                                                                                                                 |  |
|--|--|--|--|--|--|-----------------------------------------------------------------------------------------------------------------------------------------------------------------------------------------------------------------------------------------------------------------------------------------------------------------------------------------------------------------------------------------------------------------------------------------------------------------|--|
|  |  |  |  |  |  | <p>10-5 , -1.3 × 10-5 ], P = 0.009. There was a significant group difference between total SRS scores of the Low and the High INT PGS groups; total t-score t = 66.0 in the Low PGS group and t = 76.2 in the High PGS group; t(45) = -2.27, 95% CI [-19.11, -1.14], P = 0.028, Cohen's d = 0.66. There was a significant group difference between the Low and the High autism polygenic score groups in the BRI scores from the BRIEF; BRI t = 62.9 in the</p> |  |
|--|--|--|--|--|--|-----------------------------------------------------------------------------------------------------------------------------------------------------------------------------------------------------------------------------------------------------------------------------------------------------------------------------------------------------------------------------------------------------------------------------------------------------------------|--|

|  |  |  |  |  |  |                                                                                                                                                                                                                                                                                                                                                                                                             |  |
|--|--|--|--|--|--|-------------------------------------------------------------------------------------------------------------------------------------------------------------------------------------------------------------------------------------------------------------------------------------------------------------------------------------------------------------------------------------------------------------|--|
|  |  |  |  |  |  | <p>Low polygenic score group and <math>t = 71.5</math> in the High polygenic score group; <math>t(49) = -2.51</math>, 95% CI <math>[-15.45, -1.71]</math>, <math>P = 0.015</math>, Cohen's <math>d = 0.69</math>. <b>The autism polygenic score was not associated with parental educational level (fathers education level <math>P = 0.784</math>, mothers education level <math>P = 0.798</math>)</b></p> |  |
|--|--|--|--|--|--|-------------------------------------------------------------------------------------------------------------------------------------------------------------------------------------------------------------------------------------------------------------------------------------------------------------------------------------------------------------------------------------------------------------|--|

|                              |       |                                                                                                                                                                                                                                                          |                                                                                 |                                                                                                                     |                                                  |                                                                                                                                                                                                                                                                                                                                                                                                                                               |            |
|------------------------------|-------|----------------------------------------------------------------------------------------------------------------------------------------------------------------------------------------------------------------------------------------------------------|---------------------------------------------------------------------------------|---------------------------------------------------------------------------------------------------------------------|--------------------------------------------------|-----------------------------------------------------------------------------------------------------------------------------------------------------------------------------------------------------------------------------------------------------------------------------------------------------------------------------------------------------------------------------------------------------------------------------------------------|------------|
| Warrier (2020) <sup>96</sup> | Other | UKB participants. Sample size differed per outcome measure with a minimum of 105,222 and a maximum of 105,638 participants; 44% males. Participants were born between 1936–1970. Participants were British. Genetic ancestry was restricted to European. | PRSice. Seven P-value thresholds (P = 1, 0.75, 0.5, 0.25, 0.1, 0.01, and 0.001) | Childhood trauma (childhood trauma screener), self-harm and suicidal behaviour ideation (consisting of 4 UKB items) | 20 PCs, year of birth, sex, and genotyping batch | Autism polygenic score at all seven P-value thresholds were significantly associated with childhood trauma score (strongest association: R2 = 0.096%, P < 2 × 10 <sup>-16</sup> ). Autism polygenic score was also significantly associated with 4 out of 5 individual childhood trauma items (strongest association: R2 = 0.092%, P < 2 × 10 <sup>-16</sup> ). Autism polygenic score were also significantly and positively associated with | Bonferroni |
|------------------------------|-------|----------------------------------------------------------------------------------------------------------------------------------------------------------------------------------------------------------------------------------------------------------|---------------------------------------------------------------------------------|---------------------------------------------------------------------------------------------------------------------|--------------------------------------------------|-----------------------------------------------------------------------------------------------------------------------------------------------------------------------------------------------------------------------------------------------------------------------------------------------------------------------------------------------------------------------------------------------------------------------------------------------|------------|

|                          |                                                          |                                                                                                                                     |                                                 |                                                                                                                           |                     |                                                                                                                                                                                                                                                                                                                                                                                                                                             |                                         |
|--------------------------|----------------------------------------------------------|-------------------------------------------------------------------------------------------------------------------------------------|-------------------------------------------------|---------------------------------------------------------------------------------------------------------------------------|---------------------|---------------------------------------------------------------------------------------------------------------------------------------------------------------------------------------------------------------------------------------------------------------------------------------------------------------------------------------------------------------------------------------------------------------------------------------------|-----------------------------------------|
|                          |                                                          |                                                                                                                                     |                                                 |                                                                                                                           |                     | <p>both self-harm ideation (strongest association: <math>R^2 = 0.108\%</math>, <math>P &lt; 2 \times 10^{-16}</math>) and self-harm scores (strongest association: <math>R^2 = 0.13\%</math>, <math>P &lt; 2 \times 10^{-16}</math>).</p> <p>Autism polygenic score was also significantly associated with three of the four individual items (strongest association: <math>R^2 = 0.17\%</math>, <math>P &lt; 2 \times 10^{-16}</math>)</p> |                                         |
| Yap (2021) <sup>31</sup> | Autistic traits, cognition and executive function, other | 2,477 AAB participants that fell into four groups: 1) child participants (aged 2–17 years) diagnosed with autism or queried for the | SbayesR. Bayesian approach, no threshold needed | Autism group: parent- or caregiver-reported ADOS-2, ADOS-G, Developmental, Dimensional and Diagnostic Interview, Vineland | age, sex and 20 PCs | The autism polygenic score was not associated with autism-related phenotypes. A nominal association with MSEL non-verbal                                                                                                                                                                                                                                                                                                                    | Bonferroni correction: $p \leq 0.05/50$ |

|  |  |                                                                                                                                                                                                                                                                                                                                                                          |  |                                                                                                                                                                                                                                                                |  |                                                                                                                                                                                                                     |  |
|--|--|--------------------------------------------------------------------------------------------------------------------------------------------------------------------------------------------------------------------------------------------------------------------------------------------------------------------------------------------------------------------------|--|----------------------------------------------------------------------------------------------------------------------------------------------------------------------------------------------------------------------------------------------------------------|--|---------------------------------------------------------------------------------------------------------------------------------------------------------------------------------------------------------------------|--|
|  |  | <p>condition, with some multiply-affected families; 2) parents of children with autism; 3) siblings of diagnosed children who did not themselves meet autism criteria; and 4) unrelated children without an autism diagnosis and with no known first-degree relatives with an autism diagnosis. Participants were Australian and predominantly of European ancestry.</p> |  | <p>Adaptive Behavior Scale, SSP-2. Parent: Communication Checklist-Adult. Siblings/unrelated: Social Responsiveness Scale. Cognitive function in all groups: MSEL or WISC-IV WASI. Sleep problems Autism/siblings/unrelated group: Children's Sleep Habits</p> |  | <p>development (<math>r=-0.11</math>, <math>p=7.4e-3</math> in the autism group alone) and a marginal association with parental WASI matrix reasoning (<math>r=0.07</math>, <math>p=5.5e-2</math>) is reported.</p> |  |
|--|--|--------------------------------------------------------------------------------------------------------------------------------------------------------------------------------------------------------------------------------------------------------------------------------------------------------------------------------------------------------------------------|--|----------------------------------------------------------------------------------------------------------------------------------------------------------------------------------------------------------------------------------------------------------------|--|---------------------------------------------------------------------------------------------------------------------------------------------------------------------------------------------------------------------|--|

|                            |                                                                            |                                                                                                                                                                                                                                                                                                                                                                    |                                                                                                                                                                                                      |                                                                                                        |                                                |                                                                                                                                                                                                                                                                                                                                              |     |
|----------------------------|----------------------------------------------------------------------------|--------------------------------------------------------------------------------------------------------------------------------------------------------------------------------------------------------------------------------------------------------------------------------------------------------------------------------------------------------------------|------------------------------------------------------------------------------------------------------------------------------------------------------------------------------------------------------|--------------------------------------------------------------------------------------------------------|------------------------------------------------|----------------------------------------------------------------------------------------------------------------------------------------------------------------------------------------------------------------------------------------------------------------------------------------------------------------------------------------------|-----|
| Zhang (2022) <sup>37</sup> | Autism diagnosis, specific psychiatric classifications, physical wellbeing | The sample consisted of 3,189 individuals diagnosed with an eating disorder, 134 of whom were also diagnosed with autism. Of the individuals without autism, 1.9% was male and mean birth year was 1988.77 (5.54). Of the individuals with autism, 5.2% was male and mean birth year was 1989.04. All participants were Swedish. Genetic ancestry is not reported. | Plink. First principal components for polygenic scores built from 10 thresholds (p-values: 5 x 10 <sup>-8</sup> , 1 x 10 <sup>-6</sup> , 1 x 10 <sup>-4</sup> , 0.001, 0.01, 0.05, 0.1, 0.2, 0.5, 1) | Eating disorder severity and persistence, eating disorder treatment, suicidal behaviour and self-harm, | Sex and birth year in 3 year intervals, 10 PCs | Autism polygenic score was not statistically significantly associated with any ED severity, persistence, and treatment outcomes nor suicidal behaviour and self-harm (OR range: 0.79–1.02, $\beta$ range: -0.34–0.03, IRR range: 0.82–1.06). Autism polygenic score was also not associated with autism diagnostic status ( $R^2 = 0.0182$ ) | FDR |
|----------------------------|----------------------------------------------------------------------------|--------------------------------------------------------------------------------------------------------------------------------------------------------------------------------------------------------------------------------------------------------------------------------------------------------------------------------------------------------------------|------------------------------------------------------------------------------------------------------------------------------------------------------------------------------------------------------|--------------------------------------------------------------------------------------------------------|------------------------------------------------|----------------------------------------------------------------------------------------------------------------------------------------------------------------------------------------------------------------------------------------------------------------------------------------------------------------------------------------------|-----|

NOTE. Results are presented per outcome category. For studies that had several outcome measures that fit in multiple categories, we presented all results and marked the ones relevant to the outcome category of interest in bold. If authors of the included studies did not select a primary PGS P value threshold, we reported the results for the most significant association. Outcome categories are labeled as ‘autism diagnosis’, ‘autistic

traits', 'other psychiatric classifications', 'general psychopathology', 'cognition and executive function', 'physical wellbeing', 'early neurodevelopment', 'brain measures', 'emotion recognition', 'phe-WAS' and other. ABCD = Adolescent Brain Cognitive Development, ADHD = attention deficit/hyperactivity disorder, ADI-R = Autism Diagnostic Interview – Revised, ADOS = Autism Diagnostic Observation Schedule, AGRE = Autism Genetic Research Exchange, ALFF = amplitude of low frequency fluctuation, ALSPAC = Avon Longitudinal Study of Parents and Children, ANGI = Anorexia Nervosa Genetics Initiative, ANT = Amsterdam Neuropsychological Test, A-TAC = Autism-, Tics, ADHD and other Comorbidities, BAPQ = Broad Autism Phenotype Questionnaire, BISBAS = behavioural inhibition and behavioural activation, BRIEFF = Behavior rating inventory of executive function, CATSS = Child and Adolescent Twin Study in Sweden, CBCL = Child Behaviour Checklist, CATSS = Child and Adolescent Twin Study in Sweden, CI = confidence interval, CNV = copy number variant, DAWBA = Development and Wellbeing Assessment, DANVA = Diagnostic Analysis of Non-Verbal Accuracy, DCDQ = Developmental Coordination Disorder Questionnaire, DSM = Diagnostic and Statistical Manual of Mental Disorders, ED = eating disorder, ERT = Emotion Recognition Task, FA = fractional anisotropy, FDR = False Discovery Rate, GBLUP = Genomic Best Linear Unbiased Prediction, Genes and Environment, GWAS = genome-wide association study, HBC = Hamamatsu Birth Cohort for Mothers and Children, HR = Hazard ratio, ICD = International Classification of Disease, IQR = Inter Quartile Range, KSADS = Kiddie schedule for affective disorders and schizophrenia, MD = mean diffusivity, MHQ = Mental Health Questionnaire, MoBa = Norwegian Mother, Father and Child Cohort Study, MSEL = Mullen Scales of Early Learning, NESCOG = Netherlands Study of Cognition, Genes and Environment, NIH = National Institute of Health, NHS = Nurses Health Study, NIAS = Nine-Item Avoidant/Restrictive Food Intake Disorder, OR = odds ratio, PARCA = Parent Report of Children's Abilities', PDV =

Potentially damaging variant status, PGC = Psychiatric Genomics Consortium, phe-WAS = phenome-wide association study, PING = Pediatric Imaging, Neurocognition and Genetics, PQ-B = Prodromal Questionnaire Brief, Psychiatric Research, QQ = Quantile-Quantile, RBS-R = Repetitive Behaviors Scale – Revised, RR = Risk Ratio, SCDC = Social and Communication Disorders Checklist, SD = standard deviation, SDQ = Strengths and Difficulties Questionnaire, SE = Standard Error, SES = socioeconomic status, SRS = Social Responsiveness Scale, SSC = Simons Simplex Collection, SNP = single nucleotide polymorphism, SSP-2 = Short Sensory Profile-2, TDC = typically developing children, TEDS = Twins Early Development Study, TRF = Teacher Report Form, UKB = UK Biobank, WASI = Wechsler Abbreviated Scale of Intelligence, WISC = Wechsler Intelligence Scale for Children, WISC-3 = Wechsler Intelligence Scale for Children—Third Edition.



## **Category construction**

Outcome categories were constructed through consultation and careful consideration between authors MdW, MM, TJP, SB, AR and AA. They were loosely based on codes from the International Classification of Diseases (ICD) and the World Health Organization International Classification of Functioning, Disability and Health (ICF) and resembled Ronald et al.'s (2021)<sup>18</sup> category structure, although there were some dissimilarities (e.g., no addiction category, but a category for emotion recognition). This resulted in 11 categories, reflecting the literature that was identified: Autism diagnostic status, autistic traits, other specific psychiatric classifications, general psychopathology, brain measures, cognition and executive function, emotion recognition, early neurodevelopment, physical wellbeing, phenome-wide association studies (phe-WAS) and other. Note that some studies included outcome variables that fit into multiple categories.

## **Quality assessment**

For 60 studies, 0 biases were detected. Nine studies had one bias, one had two, and one had three biases. We concluded that the quality of included studies is overall good and biases were not clustered in specific outcome categories. The quality assessments are presented in sTable 3, available online.

## **Systematic review and meta-analysis**

A total of 760 outcome variables were included in the meta-analysis. Rosenthal's failsafe N ranged from 102 for emotion recognition to 39,921 for autism diagnosis (sTable 4, available online), meaning that 102 to 39,921 null findings would be needed to negate significant findings. Funnel plot tests for asymmetry per outcome category based on standard error were not significant ( $p > .088$ ) except for brain measures ( $p = .006$ ) and autistic traits ( $p < .001$ ),

indicating a potential publication bias. Histograms and boxplots of effect sizes, and funnel plots of standard errors are presented in Supplementary Figures 1 – 3, available online. Detailed descriptions of sample characteristics, methods of calculating polygenic scores, GWAS p-value threshold, outcome measures, covariates, results, and multiple testing corrections per study and per outcome category are provided in Table 1. Meta-analytic pooled correlation coefficients ranged from .013 for early neurodevelopment to .162 for autism diagnosis. The number of studies in each category ranged from 3 (phe-was) to 20 (other), with a minimum of 2 and a maximum of 11 independent cohorts per category. A summary of the meta-analysis results for all outcome categories is presented in Table 2 and Figure 2.

Table 2. Summary of Multi-level Meta-Analysis Results per Outcome Category

| Outcome category                     | <i>n</i> studies | <i>n</i> independent cohorts | <i>n</i> est | Pooled <i>r</i> [95% CI] | <i>r</i> range | <i>P</i> | <i>I</i> <sup>2</sup> |                |               |
|--------------------------------------|------------------|------------------------------|--------------|--------------------------|----------------|----------|-----------------------|----------------|---------------|
|                                      |                  |                              |              |                          |                |          | Total                 | Between-cohort | Within-cohort |
| Autism diagnosis                     | 9                | 4                            | 10           | .162<br>[.066 – .258]    | .030 – .346    | .004     | 99.6%                 | 28.4%          | 71.2%         |
| Autistic traits                      | 11               | 9                            | 44           | .042<br>[.004 – .081]    | -.074 – .313   | .031     | 94.8%                 | 87.3%          | 7.5%          |
| Specific psychiatric classifications | 17               | 12                           | 81           | .044<br>[.016 – .073]    | -.185 – .213   | .003     | 99.2%                 | 33.3%          | 65.9%         |
| General psychopathology              | 7                | 4                            | 190          | .035<br>[.026 – .044]    | -.143 – .292   | <.001    | 91.5%                 | 1.0%           | 90.5%         |
| Cognition and executive function     | 9                | 9                            | 39           | .042<br>[.008 – .075]    | -.338 – .170   | .017     | 94.1%                 | 88.4%          | 5.7%          |
| Physical wellbeing                   | 8                | 8                            | 181          | .016<br>[.006 – .026]    | -.198 – .166   | .002     | 98.3%                 | 1.5%           | 96.8%         |
| Early neurodevelopment               | 8                | 7                            | 43           | .013<br>[-.038 – .063]   | -.110 – .112   | .612     | 94.2%                 | 93.3%          | 0.9%          |

|                     |    |    |       |                         |              |      |       |       |       |
|---------------------|----|----|-------|-------------------------|--------------|------|-------|-------|-------|
| Emotion recognition | 3  | 3  | 5     | .018<br>[ -.034 – .381] | –.229 – .400 | .900 | 99.0% | 36.6% | 62.3% |
| Brain measures      | 9  | 9  | 217   | .160<br>[ .031 – .288]  | –.364 – .57  | .015 | 99.9% | 80.5% | 19.4% |
| Phe-WAS             | 3  | 2  | 26733 | NA                      | NA           | NA   | NA    | NA    | NA    |
| Other               | 20 | 28 |       | NA                      | NA           | NA   | NA    | NA    | NA    |

*NOTE.* *n* studies = number of studies, *n* ind. coh = number of independent cohorts the included studies are based on, *n* est = number of effect size estimates included

### Forest plot: Summary over Outcome Categories

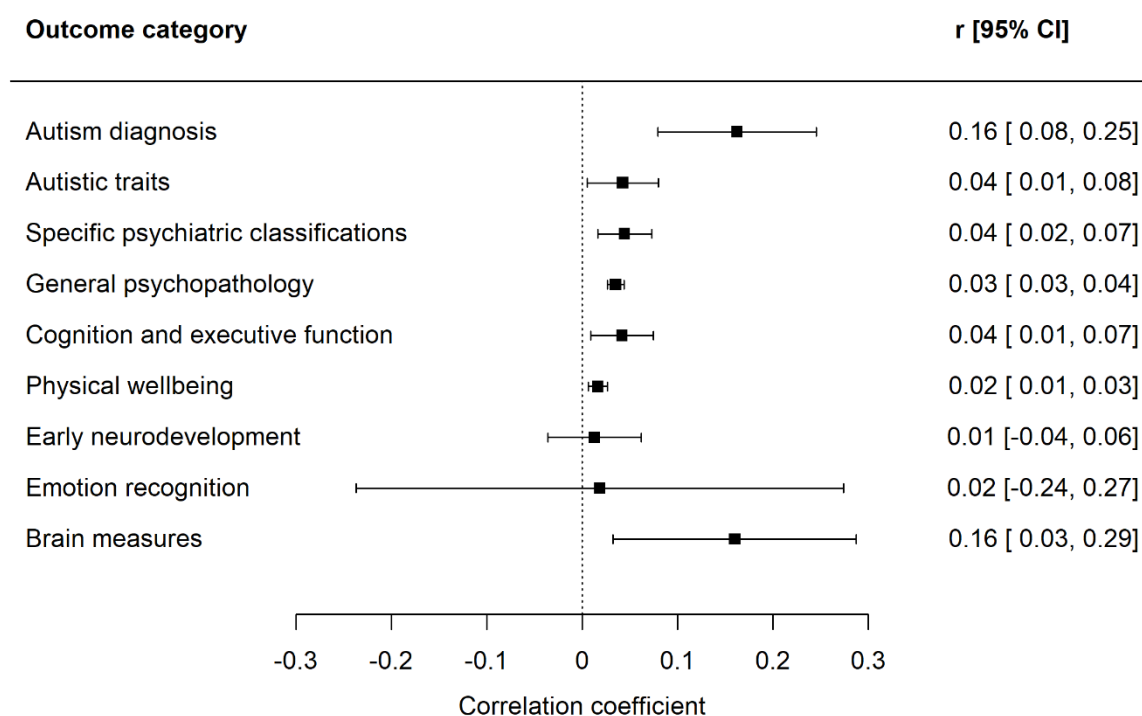

Figure 2. Summary of Multilevel Meta-Analysis over Outcome Categories

*Autism diagnosis*

*Systematic review.* Nine studies assessed the association between the autism polygenic score and autism diagnosis. Of these, seven reported a significant positive association<sup>10,25,27,30,32,33,36</sup>. Two studies, based on smaller samples than the ones that reported significant associations, reported no significant association<sup>37,50</sup>. In addition, the autism polygenic score acted in a dose-dependent manner, where people in higher percentiles on average were more likely to be diagnosed with autism<sup>10,36</sup>.

*Meta-analysis.* Standardized correlation coefficients ranged from 0.030 to 0.346. One outcome was omitted from this range, as it differentiated whether the autism polygenic score distinguished autism diagnosis versus ADHD diagnosis<sup>27</sup>. The overall meta-analyzed effect size was  $r = .162$  (95% CI .066 – .258), indicating a small positive association between the autism polygenic score and autism diagnosis. Total  $I^2$  was 99.6%, of which 28.4% between-study and 71.2% within-study. All meta-analysis results for the category of autism diagnosis, including secondary results are presented in Supplementary Figure 4.

### *Autistic traits*

*Systematic review.* Eleven studies assessed the association between the autism polygenic score and autistic traits, either in the form of a total score or specific traits such as repetitive behavior, language and social communication. Four of these assessed total scores for autistic traits<sup>40,42,44,45</sup>, one of which was performed in a non-European sample. In children, the autism polygenic score was associated with overall autistic traits in a Japanese<sup>44</sup> and Swedish sample<sup>45</sup>, but not in a United States (US) sample<sup>40</sup>. In adults, the autism polygenic score was not associated with overall autistic traits<sup>40,42</sup>.

Social behavior was the most commonly studied specific autistic trait, with seven studies assessing the association. Four did not find a significant association<sup>31,38,39,45</sup>, and three did<sup>41,43,44</sup>, one of which was a Japanese sample. The autism polygenic score did not associate

with restricted and repetitive behavior<sup>38,46</sup>, nor language and communication measures at various ages in childhood<sup>38,45,46</sup>, except for language difficulties at the age of 18 months<sup>38</sup>. In addition, the autism polygenic score was not associated with broad autistic traits as measured by the Broad Autism Phenotype Questionnaire (BAPQ) in children with autism or their parents, except for two significant positive associations with the pragmatic and total scale of the BAPQ in mothers of autistic children<sup>40</sup>.

*Meta-analysis.* One study on autistic traits was omitted from the meta-analysis effect sizes because effect sizes were not reported<sup>40</sup>. Correlation coefficients ranged from  $-.074$  to  $.313$ . The overall meta-analyzed correlation coefficient was  $r = .04$  (95% CI  $.004 - .081$ ). Total  $I^2$  was 94.8%, of which 87.3% between-study and 7.5% within-study. Meta-analysis results for autistic traits are presented in Supplementary Figure 5.

#### *Specific psychiatric classifications*

Eighteen studies assessed the relationship between the autism polygenic score and specific psychiatric classifications (other than autism). Included studies assessed a range of classifications or traits : ADHD (n = 2)<sup>27,34</sup>, ADHD traits (n= 2)<sup>38,42</sup>, depression (n = 2)<sup>48,56</sup>, addiction (n = 1)<sup>49</sup>, suicidal ideation and/or suicide attempt (n = 3)<sup>51,59,97</sup>, eating disorders (n= 2)<sup>37,53</sup>, psychotic spectrum (n= 3)<sup>54,55,57</sup> and nocturnal enuresis (n = 1)<sup>52</sup>.

One study showed a significant association with ADHD diagnosis<sup>27</sup>, whereas another did not<sup>34</sup>. The autism polygenic score was significantly associated with ADHD symptoms in an east Asian sample<sup>67</sup>, but not in two studies European ancestry samples<sup>38,42</sup>, except for one positive association with inattention and hyperactivity at the age of 8 years. The autism polygenic score did not associate with schizophrenia diagnosis in two East Asian samples<sup>57,58</sup>, and in a European ancestry sample it positively associated with some, but not all specific domains of the psychotic spectrum (e.g. auditory and visual hallucinations)<sup>55</sup>. Two studies

found consistent positive associations with lifetime depression<sup>48,56</sup> and one with depression or anxiety symptoms specifically during pregnancy<sup>48</sup>. No associations were found between the autism polygenic score and disordered eating behavior in two studies<sup>37,53</sup>, except for increased parent-reported Avoidant/restrictive food intake disorder (ARFID). One study reported no associations between the autism polygenic score and cannabis use disorder<sup>49</sup>, except for an unexpected negative association in people diagnosed with DSM classifications other than schizophrenia. One study reported no association with nocturnal enuresis<sup>52</sup>. Lastly, one study reported that the autism polygenic score was not associated with the case-control status of any psychiatric classification<sup>50</sup>.

One study found that the autism polygenic score distinguished people with autism from those with ADHD<sup>27</sup>.

*Meta-analysis.* Correlation coefficients ranged from  $-.185$  to  $.213$ . The overall meta-analyzed correlation coefficient was  $r = .044$  (95% CI  $.016 - .073$ ). Total  $I^2$  was 99.2%, of which 33.9% between-study and 65.4% within-study. Meta-analysis results for specific psychiatric classifications are presented in sFigure 6, and secondary results in sTable 5 and sFigure 7.

### **Other outcome categories**

Associations between the autism polygenic score and other outcome categories were overall small (median  $r = .03$ ) and inconsistent. Detailed descriptions of these associations are provided in Table 1, Figure 1 and the Supplementary Results and Supplementary Results, available online. Forest plots are presented in sFigures 8 – 13, available online.

### **Heterogeneity**

We found considerable heterogeneity across all outcome categories ( $I^2 \geq 91.5\%$ ). To provide a more complete picture of the heterogeneity in the included studies, and because  $I^2$  is not a particularly suitable statistic when assessing very large sample sizes, all meta-analyses forest plots also report Q statistics<sup>98</sup>.

## Discussion

Overall, our results showed that the autism polygenic score was most strongly and most consistently associated with autism diagnosis in independent cohorts. A higher polygenic score translates into an increased likelihood of being diagnosed with autism<sup>10,36</sup>. The association of the autism polygenic score with autistic traits was significant but smaller. Associations with outcomes other than autism diagnosis and autistic traits were inconsistent and meta-analytic effect sizes were generally small. Here we discuss our results, specifically zooming in on autism diagnosis, autistic traits and other psychiatric classifications because these categories contained the most consistent results. We discuss implications and provide recommendations for future directions.

The lack of consistent associations with outcomes other than autism diagnosis and autistic traits is in contrast with a vast body of literature supporting phenotypic associations between autism and neurodevelopmental, psychiatric, and physical conditions and other traits, as well as genetic associations found in twin studies. They are also in contrast with studies that used alternative genetic methodologies such as genome-wide restricted maximum likelihood (GREML), genome-wide complex trait analysis (GCTA), and linkage disequilibrium score (LDSC) regression. A difference between polygenic scores and these methods is that the latter captures the total influence of measured SNPs whereas polygenic scores do not, potentially resulting in less power to detect genetic associations (explanations of these methods are described in Martin et al.<sup>12</sup>). Our results also highlight disparities

between the autism polygenic score and the ADHD polygenic score, with the latter showing stronger (e.g., OR between 1.22% and 1.76% for ADHD diagnosis) and more reliable, consistent associations. This is despite comparable heritability estimates and GWAS sample sizes for ADHD and autism, and also both being a neurodevelopmental condition<sup>18</sup>.

The overarching category of specific psychiatric classifications comprised numerous classifications and had an overall significant but small association with the autism polygenic score. However, results varied markedly for different classifications. Our secondary analyses to dissecting the overarching category revealed a significant association with the psychotic spectrum, but not with ADHD. These findings were in contrast with some past studies in this area<sup>10,99–102</sup>.

The inconsistency of our results and their lack of alignment with previous findings indicates that the current autism polygenic score may lack the statistical power to adequately capture shared polygenic effects. In line with this notion, two included studies found that the autism polygenic score acts largely independent from psychiatric family history<sup>36,61</sup>, despite both factors being expected to reflect a genetic predisposition to autism. This finding extends beyond autism to multiple psychiatric classifications<sup>103,104</sup>, indicating that current psychiatric polygenic scores may overall insufficiently capture genetic propensity towards psychiatric traits. As the predictive power of polygenic scores depends heavily on the statistical power of the discovery GWAS, we underscore the importance of ongoing efforts to increase GWAS sample sizes.

Our study is not without limitations. First, by focusing on univariate associations and excluding genetic measures and methods other than polygenic scores, we may have overlooked important insights into autism genetics. We refer the reader to Akingbuwa et al. (2022)<sup>99</sup> for results that are based on other methods than univariate associations<sup>99</sup>. Second, we were not able to include all the associations in our meta-analyses because some studies did not



report all effect sizes in text. Similarly, we did not include all outcome measures assessed through phenome-wide association studies in our meta-analysis, as this was infeasible due to the number of studies. Lastly, we point out the considerable heterogeneity in our included studies, as is reflected in the high  $I^2$  statistics. A high  $I^2$  value could be due to low within-sample estimation error, which is likely to occur with large sample sizes such as the ones included in our study<sup>105</sup>. However, we acknowledge that this heterogeneity may also be due to the construction of our outcome variable categories. However, even in the categories that are largely similar in their outcomes (such as autism diagnosis), heterogeneity is high. This heterogeneity remained substantial even when dissecting outcome categories into more homogeneous subcategories. This heterogeneity may have added noise to our estimates. Future studies should aim to reduce such heterogeneity to enhance our understanding of autism's polygenic nature.

A specific source of heterogeneity may be the substantial variation in polygenic score calculation, both in terms of software and the selection of the GWAS  $p$ -value thresholds. While the majority of studies apply methods that select the polygenic score that yields the strongest associations, others use a pre-defined threshold or employ principal component analyses to construct a polygenic score from multiple thresholds. Similarly, a diverse set of polygenic score calculation programs was applied. Several recent reports address this issue and advocate for standardized guidelines and reporting practices<sup>106,107</sup>, which might improve the comparability of polygenic score findings.

Despite the marked diversity in methods between studies, we observed limited diversity in the participant characteristics. The majority of studies were based on people of European ancestry, resulting in our current understanding of the autism polygenic score being almost solely based on people of European ancestry. This observation is concerning, especially considering the increasing autism prevalence rates in people from non-European

backgrounds<sup>108</sup>. Similarly, few included studies addressed understudied subgroups of autism, such as those with intellectual disability, or people with autism that are nonverbal. Both scientifically, and ethically, it would be of great value to radically improve inclusive research practices<sup>109</sup>.

We propose that GWASs, and subsequently polygenic scores, based on individual autistic traits instead of the overarching autism diagnosis might enhance our understanding of autism genetics<sup>110</sup>. Early twin studies revealed that the three domains of autistic traits (social, communication, and restricted/repetitive behavior) only modestly correlate genetically, a finding that suggests largely independent genetic effects may affect different autistic traits<sup>111,112</sup>. Yet molecular genetics have not consistently pursued this research direction<sup>96</sup>. Although some molecular genetic studies were performed on specific autistic traits, large-scale approaches are still lacking<sup>46,113</sup>.

Despite its limitations, the current autism polygenic score comprises part of a bigger picture, and should ideally, as suggested by several recent papers, be integrated with other genetic factors such as common and rare variants, psychiatric family history, and sex, in a comprehensive approach to studying autism<sup>25,36,61,114</sup>. For example, Grove et al. (2019)<sup>10</sup> found that a combined polygenic score of autism and correlated traits, such as major depressive disorder and schizophrenia, improved the prediction of autism diagnostic status. Rare genetic variants are not captured by typical polygenic scores, but have been suggested as factors of high influence on autism diagnostic status<sup>115</sup>. In line, Antaki et al. (2022)<sup>114</sup> showed that a genetic score containing a combination of common and rare genetic factors significantly increased statistical power over separate common and rare variant scores. Schendel et al. (2022)<sup>36</sup> argue that psychiatric family history and polygenic scores only minimally correlate and should therefore be considered separate, mostly uncorrelated, measures of autism's genetic etiology. Lastly, although we do not find significant sex differences in the association

of the autism polygenic score with outcome variables, there is building evidence for a different genetic makeup for men and women with autism. Autistic women on average have a higher number of genetic mutations<sup>116</sup>, higher mean polygenic load<sup>87,114</sup> and more rare copy number variants (CNV) load<sup>117</sup>. However, a potentially male-biased clinical view on the manifestation of autism might explain diagnostic differences, and subsequently observed genetic differences<sup>118</sup>

In conclusion, we show that the autism polygenic score as a standalone variable associates consistently with autism diagnostic status and dimensional autistic traits, but is unable to capture the spectrum's complex phenotypical and etiological differences and its genetic overlap with other traits and conditions. We propose considering the current autism polygenic score as a complementary measure in research, with improvements needed for a more robust understanding of autism's polygenic underpinnings.

## References

1. Bottema-Beutel K, Kapp SK, Lester JN, Sasson NJ, Hand BN. Avoiding Ableist Language: Suggestions for Autism Researchers. *Autism Adulthood*. 2021;3(1):18-29. doi:10.1089/aut.2020.0014
2. Zeidan J, Fombonne E, Scolah J, et al. Global prevalence of autism: A systematic review update. *Autism Res*. 2022;15(5):778-790. doi:10.1002/aur.2696
3. Tick B, Bolton P, Happé F, Rutter M, Rijdsdijk F. Heritability of autism spectrum disorders: a meta-analysis of twin studies. *J Child Psychol Psychiatry*. 2016;57(5):585-595. doi:10.1111/jcpp.12499

4. Martini MI, Kuja-Halkola R, Butwicka A, et al. Sex Differences in Mental Health Problems and Psychiatric Hospitalization in Autistic Young Adults. *JAMA Psychiatry*. 2022;79(12):1188-1198. doi:10.1001/jamapsychiatry.2022.3475
5. Buijsman R, Begeer S, Scheeren AM. ‘Autistic person’ or ‘person with autism’? Person-first language preference in Dutch adults with autism and parents. *Autism*. 2023;27(3):788-795. doi:10.1177/13623613221117914
6. Taboas A, Doepke K, Zimmerman C. Preferences for identity-first versus person-first language in a US sample of autism stakeholders. *Autism*. 2023;27(2):565-570. doi:10.1177/13623613221130845
7. Bougeard C, Picarel-Blanchot F, Schmid R, Campbell R, Buitelaar J. Prevalence of Autism Spectrum Disorder and Co-morbidities in Children and Adolescents: A Systematic Literature Review. *Front Psychiatry*. 2021;12. Accessed September 18, 2023. <https://www.frontiersin.org/articles/10.3389/fpsy.2021.744709>
8. Gidziela A, Ahmadzadeh YI, Michelini G, et al. A meta-analysis of genetic effects associated with neurodevelopmental disorders and co-occurring conditions. *Nat Hum Behav*. 2023;7(4):642-656. doi:10.1038/s41562-023-01530-y
9. Tick B, Colvert E, McEwen F, et al. Autism Spectrum Disorders and Other Mental Health Problems: Exploring Etiological Overlaps and Phenotypic Causal Associations. *J Am Acad Child Adolesc Psychiatry*. 2016;55(2):106-113.e4. doi:10.1016/j.jaac.2015.11.013
10. Grove J, Ripke S, Als TD, et al. Identification of common genetic risk variants for autism spectrum disorder. *Nat Genet* 2019 513. 2019;51(3):431-444. doi:10.1038/s41588-019-0344-8

11. Willoughby EA, Polderman TJC, Boutwell BB. Behavioural genetics methods. *Nat Rev Methods Primer*. 2023;3(1):1-16. doi:10.1038/s43586-022-00191-x
12. Martin AR, Daly MJ, Robinson EB, Hyman SE, Neale BM. Predicting Polygenic Risk of Psychiatric Disorders. *Biol Psychiatry*. 2019;86(2):97-109.  
doi:10.1016/j.biopsych.2018.12.015
13. Wray NR, Lin T, Austin J, et al. From Basic Science to Clinical Application of Polygenic Risk Scores: A Primer. *JAMA Psychiatry*. 2021;78(1):101-109.  
doi:10.1001/jamapsychiatry.2020.3049
14. Polderman TJC, Benyamin B, de Leeuw CA, et al. Meta-analysis of the heritability of human traits based on fifty years of twin studies. *Nat Genet*. 2015;47(7):702-709.  
doi:10.1038/ng.3285
15. Du Rietz E, Coleman J, Glanville K, Choi SW, O'Reilly PF, Kuntsi J. Association of Polygenic Risk for Attention-Deficit/Hyperactivity Disorder With Co-occurring Traits and Disorders. *Biol Psychiatry Cogn Neurosci Neuroimaging*. 2018;3(7):635-643.  
doi:10.1016/j.bpsc.2017.11.013
16. Green A, Baroud E, DiSalvo M, Faraone SV, Biederman J. Examining the impact of ADHD polygenic risk scores on ADHD and associated outcomes: A systematic review and meta-analysis. *J Psychiatr Res*. 2022;155:49-67.  
doi:10.1016/j.jpsychires.2022.07.032
17. Mistry S, Harrison JR, Smith DJ, Escott-Price V, Zammit S. The use of polygenic risk scores to identify phenotypes associated with genetic risk of schizophrenia: Systematic review. *Schizophr Res*. 2018;197:2-8. doi:10.1016/j.schres.2017.10.037

18. Ronald A, de Bode N, Polderman TJC. Systematic Review: How the Attention-Deficit/Hyperactivity Disorder Polygenic Risk Score Adds to Our Understanding of ADHD and Associated Traits. *J Am Acad Child Adolesc Psychiatry*. 2021;60(10):1234-1277. doi:10.1016/j.jaac.2021.01.019
19. Hayden JA, Côté P, Bombardier C. Evaluation of the Quality of Prognosis Studies in Systematic Reviews. *Ann Intern Med*. 2006;144(6):427-437. doi:10.7326/0003-4819-144-6-200603210-00010
20. Hayden JA, van der Windt DA, Cartwright JL, Côté P, Bombardier C. Assessing Bias in Studies of Prognostic Factors. *Ann Intern Med*. 2013;158(4):280-286. doi:10.7326/0003-4819-158-4-201302190-00009
21. Viechtbauer W. Conducting Meta-Analyses in R with the metafor Package. *J Stat Softw*. 2010;36:1-48. doi:10.18637/jss.v036.i03
22. Assink M, Wibbelink CJM. Fitting three-level meta-analytic models in R: A step-by-step tutorial. *Quant Methods Psychol*. 2016;12(3):154-174. doi:10.20982/tqmp.12.3.p154
23. Harrer M, Cuijpers P, Furukawa T, Ebert D. *Doing Meta-Analysis with R: A Hands-on Guide*. Chapman and Hall/CRC; 2021. Accessed December 20, 2023. <https://www.taylorfrancis.com/books/mono/10.1201/9781003107347/meta-analysis-mathias-harrer-pim-cuijpers-toshi-furukawa-david-ebert>
24. Rosenthal R. The file drawer problem and tolerance for null results. *Psychol Bull*. 1979;86(3):638-641. doi:10.1037/0033-2909.86.3.638

25. Klei L, McClain LL, Mahjani B, et al. How rare and common risk variation jointly affect liability for autism spectrum disorder. *Mol Autism*. 2021;12(1):1-13. doi:10.1186/S13229-021-00466-2/FIGURES/5
26. Klein L, D'Urso S, Eapen V, Hwang LD, Lin PI. Exploring polygenic contributors to subgroups of comorbid conditions in autism spectrum disorder. *Sci Rep*. 2022;12(1):3416. doi:10.1038/s41598-022-07399-7
27. Mattheisen M, Grove J, Als TD, et al. Identification of shared and differentiating genetic architecture for autism spectrum disorder, attention-deficit hyperactivity disorder and case subgroups. *Nat Genet*. 2022;54(10):1470-1478. doi:10.1038/s41588-022-01171-3
28. Morneau-Vaillancourt G, Andlauer TFM, Ouellet-Morin I, et al. Polygenic scores differentially predict developmental trajectories of subtypes of social withdrawal in childhood. *J Child Psychol Psychiatry*. 2021;62(11):1320-1329. doi:10.1111/jcpp.13459
29. Riglin L, Tobarra-Sanchez E, Stergiakouli E, et al. Early manifestations of genetic liability for ADHD, autism and schizophrenia at ages 18 and 24 months. *JCPP Adv*. 2022;2(3):e12093. doi:10.1002/jcv2.12093
30. Trost B, Thiruvahindrapuram B, Chan AJS, et al. Genomic architecture of autism from comprehensive whole-genome sequence annotation. *Cell*. 2022;185(23):4409-4427.e18. doi:10.1016/j.cell.2022.10.009
31. Yap CX, Alvares GA, Henders AK, et al. Analysis of common genetic variation and rare CNVs in the Australian Autism Biobank. *Mol Autism*. 2021;12(1):1-17. doi:10.1186/S13229-020-00407-5/FIGURES/3

32. Debost JCPG, Thorsteinsson E, Trabjerg B, et al. Genetic and psychosocial influence on the association between early childhood infections and later psychiatric disorders. *Acta Psychiatr Scand.* 2022;146(5):406-419. doi:10.1111/acps.13491
33. Hannon E, Schendel D, Ladd-Acosta C, et al. Elevated polygenic burden for autism is associated with differential DNA methylation at birth. *Genome Med.* 2018;10(1):19. doi:10.1186/s13073-018-0527-4
34. Jansen AG, Dieleman GC, Jansen PR, Verhulst FC, Posthuma D, Polderman TJC. Psychiatric Polygenic Risk Scores as Predictor for Attention Deficit/Hyperactivity Disorder and Autism Spectrum Disorder in a Clinical Child and Adolescent Sample. *Behav Genet.* 2020;50(4):203-212. doi:10.1007/S10519-019-09965-8/FIGURES/1
35. Demontis D, Walters RK, Martin J, et al. Discovery of the first genome-wide significant risk loci for attention deficit/hyperactivity disorder. *Nat Genet.* 2019;51(1):63-75. doi:10.1038/s41588-018-0269-7
36. Schendel D, Munk Laursen T, Albiñana C, et al. Evaluating the interrelations between the autism polygenic score and psychiatric family history in risk for autism. *Autism Res.* 2022;15(1):171-182. doi:10.1002/AUR.2629
37. Zhang R, Birgegård A, Fundín B, et al. Association of autism diagnosis and polygenic scores with eating disorder severity. *Eur Eat Disord Rev.* 2022;30(5):442-458. doi:10.1002/erv.2941
38. Askeland RB, Hannigan LJ, Ask H, et al. Early manifestations of genetic risk for neurodevelopmental disorders. *J Child Psychol Psychiatry.* 2021;63(7):810-819. doi:10.1111/JCPP.13528



39. Li D, Choque-Olsson N, Jiao H, et al. The influence of common polygenic risk and gene sets on social skills group training response in autism spectrum disorder. *Npj Genomic Med* 2020 5(1). 2020;5(1):1-8. doi:10.1038/s41525-020-00152-x
40. Nayar K, Sealock JM, Maltman N, et al. Elevated Polygenic Burden for Autism Spectrum Disorder Is Associated With the Broad Autism Phenotype in Mothers of Individuals With Autism Spectrum Disorder. *Biol Psychiatry*. 2021;89(5):476-485. doi:10.1016/J.BIOPSYCH.2020.08.029
41. Reed ZE, Mahedy L, Jackson A, et al. Examining the bidirectional association between emotion recognition and social autistic traits using observational and genetic analyses. *J Child Psychol Psychiatry*. 2021;62(11):1330-1338. doi:10.1111/JCPP.13395
42. Riglin L, Leppert B, Langley K, et al. Investigating attention-deficit hyperactivity disorder and autism spectrum disorder traits in the general population: What happens in adult life? *J Child Psychol Psychiatry*. 2021;62(4):449-457. doi:10.1111/JCPP.13297
43. Serdarevic F, Tiemeier H, Jansen PR, et al. Polygenic Risk Scores for Developmental Disorders, Neuromotor Functioning During Infancy, and Autistic Traits in Childhood. *Biol Psychiatry*. 2020;87(2):132-138. doi:10.1016/J.BIOPSYCH.2019.06.006
44. Takahashi N, Harada T, Nishimura T, et al. Association of Genetic Risks With Autism Spectrum Disorder and Early Neurodevelopmental Delays Among Children Without Intellectual Disability. *JAMA Netw Open*. 2020;3(2):1921644. doi:10.1001/jamanetworkopen.2019.21644
45. Taylor MJ, Martin J, Lu Y, et al. Association of Genetic Risk Factors for Psychiatric Disorders and Traits of These Disorders in a Swedish Population Twin Sample. *JAMA Psychiatry*. 2019;76(3):280-289. doi:10.1001/JAMAPSYCHIATRY.2018.3652

46. Thomas TR, Koomar T, Casten LG, Tener AJ, Bahl E, Michaelson JJ. Clinical autism subscales have common genetic liabilities that are heritable, pleiotropic, and generalizable to the general population. *Transl Psychiatry*. 2022;12(1):247. doi:10.1038/s41398-022-01982-2
47. Torske T, Nærland T, Bettella F, et al. Autism spectrum disorder polygenic scores are associated with every day executive function in children admitted for clinical assessment. *Autism Res Off J Int Soc Autism Res*. 2020;13(2):207-220. doi:10.1002/AUR.2207
48. Havdahl A, Wootton RE, Leppert B, et al. Associations Between Pregnancy-Related Predisposing Factors for Offspring Neurodevelopmental Conditions and Parental Genetic Liability to Attention-Deficit/Hyperactivity Disorder, Autism, and Schizophrenia: The Norwegian Mother, Father and Child Cohort Study (MoBa). *JAMA Psychiatry*. 2022;79(8):799. doi:10.1001/jamapsychiatry.2022.1728
49. Hjorthøj C, Uddin MJ, Wimberley T, et al. No evidence of associations between genetic liability for schizophrenia and development of cannabis use disorder. *Psychol Med*. 2021;51(3):479-484. doi:10.1017/S0033291719003362
50. Jansen AG, Jansen PR, Savage JE, et al. The predictive capacity of psychiatric and psychological polygenic risk scores for distinguishing cases in a child and adolescent psychiatric sample from controls. *J Child Psychol Psychiatry*. 2021;62(9):1079-1089. doi:10.1111/JCPP.13370
51. Joo YY, Moon SY, Wang HH, et al. Association of Genome-Wide Polygenic Scores for Multiple Psychiatric and Common Traits in Preadolescent Youths at Risk of Suicide. *JAMA Netw Open*. 2022;5(2):e2148585. doi:10.1001/jamanetworkopen.2021.48585

52. Jørgensen CS, Horsdal HT, Rajagopal VM, et al. Identification of genetic loci associated with nocturnal enuresis: a genome-wide association study. *Lancet Child Adolesc Health*. 2021;5(3):201-209. doi:10.1016/S2352-4642(20)30350-3
53. Koomar T, Thomas TR, Pottschmidt NR, Lutter M, Michaelson JJ. Estimating the Prevalence and Genetic Risk Mechanisms of ARFID in a Large Autism Cohort. *Front Psychiatry*. 2021;12:849. doi:10.3389/FPSYT.2021.668297/BIBTEX
54. Legge SE, Jones HJ, Kendall KM, et al. Association of Genetic Liability to Psychotic Experiences With Neuropsychotic Disorders and Traits. *JAMA Psychiatry*. 2019;76(12):1256-1265. doi:10.1001/JAMAPSYCHIATRY.2019.2508
55. Legge SE, Cardno AG, Allardyce J, et al. Associations Between Schizophrenia Polygenic Liability, Symptom Dimensions, and Cognitive Ability in Schizophrenia. *JAMA Psychiatry*. 2021;78(10):1143-1151. doi:10.1001/JAMAPSYCHIATRY.2021.1961
56. Leppert B, Havdahl A, Riglin L, et al. Association of Maternal Neurodevelopmental Risk Alleles With Early-Life Exposures. *JAMA Psychiatry*. 2019;76(8):834-842. doi:10.1001/JAMAPSYCHIATRY.2019.0774
57. Ohi K, Nishizawa D, Shimada T, et al. Polygenetic Risk Scores for Major Psychiatric Disorders Among Schizophrenia Patients, Their First-Degree Relatives, and Healthy Participants. *Int J Neuropsychopharmacol*. 2020;23(3):157-164. doi:10.1093/IJNP/PYZ073
58. Qin Y, Kang J, Jiao Z, et al. Polygenic risk for autism spectrum disorder affects left amygdala activity and negative emotion in schizophrenia. *Transl Psychiatry* 2020 101. 2020;10(1):1-12. doi:10.1038/s41398-020-01001-2

59. Russell AE, Hemani G, Jones HJ, et al. An exploration of the genetic epidemiology of non-suicidal self-harm and suicide attempt. *BMC Psychiatry*. 2021;21(1):207. doi:10.1186/S12888-021-03216-Z/FIGURES/2
60. Gui Y, Zhou X, Wang Z, et al. Sex-specific genetic association between psychiatric disorders and cognition, behavior and brain imaging in children and adults. *Transl Psychiatry*. 2022;12(1):1-8. doi:10.1038/s41398-022-02041-6
61. Loughnan RJ, Palmer CE, Makowski C, et al. Unique prediction of developmental psychopathology from genetic and familial risk. *J Child Psychol Psychiatry*. 2022;63(12):1631-1643. doi:10.1111/jcpp.13649
62. Pat N, Riglin L, Anney R, et al. Motivation and Cognitive Abilities as Mediators Between Polygenic Scores and Psychopathology in Children. *J Am Acad Child Adolesc Psychiatry*. 2022;61(6):782-795.e3. doi:10.1016/j.jaac.2021.08.019
63. Riglin L, Thapar AK, Leppert B, et al. Using Genetics to Examine a General Liability to Childhood Psychopathology. *Behav Genet*. 2020;50(4):213-220. doi:10.1007/S10519-019-09985-4/TABLES/2
64. Schlag F, Allegrini AG, Buitelaar J, et al. Polygenic risk for mental disorder reveals distinct association profiles across social behaviour in the general population. *Mol Psychiatry*. 2022;27(3):1588-1598. doi:10.1038/s41380-021-01419-0
65. Waszczuk MA, Miao J, Docherty AR, et al. General v. specific vulnerabilities: polygenic risk scores and higher-order psychopathology dimensions in the Adolescent Brain Cognitive Development (ABCD) Study. *Psychol Med*. Published online 2021:1-10. doi:10.1017/S0033291721003639

66. Aguilar-Lacasaña S, Vilor-Tejedor N, Jansen PR, et al. Polygenic risk for ADHD and ASD and their relation with cognitive measures in school children. *Psychol Med*. 2022;52(7):1356-1364. doi:10.1017/S0033291720003189
67. Chang S, Yang L, Wang Y, Faraone SV. Shared polygenic risk for ADHD, executive dysfunction and other psychiatric disorders. *Transl Psychiatry* 2020 101. 2020;10(1):1-9. doi:10.1038/s41398-020-00872-9
68. Cullen H, Selzam S, Dimitrakopoulou K, Plomin R, Edwards AD. Greater genetic risk for adult psychiatric diseases increases vulnerability to adverse outcome after preterm birth. *Sci Rep* 2021 111. 2021;11(1):1-8. doi:10.1038/s41598-021-90045-5
69. Hughes A, Wade KH, Dickson M, et al. Common health conditions in childhood and adolescence, school absence, and educational attainment: Mendelian randomization study. *Npj Sci Learn* 2021 61. 2021;6(1):1-9. doi:10.1038/s41539-020-00080-6
70. Price KM, Wigg KG, Feng Y, et al. Genome-wide association study of word reading: Overlap with risk genes for neurodevelopmental disorders. *Genes Brain Behav*. 2020;19(6). doi:10.1111/GBB.12648
71. Dennison CA, Legge SE, Bracher-Smith M, et al. Association of genetic liability for psychiatric disorders with accelerometer-assessed physical activity in the UK Biobank. *PLOS ONE*. 2021;16(3):e0249189. doi:10.1371/JOURNAL.PONE.0249189
72. Hunjan AK, Hübel C, Lin Y, Eley TC, Breen G. Association between polygenic propensity for psychiatric disorders and nutrient intake. *Commun Biol* 2021 41. 2021;4(1):1-9. doi:10.1038/s42003-021-02469-4

73. Niarchou M, Singer EV, Straub P, Malow BA, Davis LK. Investigating the genetic pathways of insomnia in Autism Spectrum Disorder. *Res Dev Disabil.* 2022;128:104299. doi:10.1016/j.ridd.2022.104299
74. Ohi K, Ochi R, Noda Y, et al. Polygenic risk scores for major psychiatric and neurodevelopmental disorders contribute to sleep disturbance in childhood: Adolescent Brain Cognitive Development (ABCD) Study. *Transl Psychiatry.* 2021;11(1):187. doi:10.1038/s41398-021-01308-8
75. Werner MCF, Wirgenes KV, Shadrin A, et al. Immune marker levels in severe mental disorders: associations with polygenic risk scores of related mental phenotypes and psoriasis. *Transl Psychiatry.* 2022;12(1):38. doi:10.1038/s41398-022-01811-6
76. Hannigan LJ, Askeland RB, Ask H, et al. Developmental milestones in early childhood and genetic liability to neurodevelopmental disorders. *Psychol Med.* 2023;53(5):1750-1758. doi:10.1017/S0033291721003330
77. Fish LA, Nyström P, Gliga T, et al. Development of the pupillary light reflex from 9 to 24 months: association with common autism spectrum disorder (ASD) genetic liability and 3-year ASD diagnosis. *J Child Psychol Psychiatry.* 2021;62(11):1308-1319. doi:10.1111/jcpp.13518
78. Gui A, Mason L, Gliga T, et al. Look duration at the face as a developmental endophenotype: elucidating pathways to autism and ADHD. *Dev Psychopathol.* 2020;32(4):1303-1322. doi:10.1017/S0954579420000930
79. Portugal AM, Taylor MJ, Viktorsson C, et al. Pupil size and pupillary light reflex in early infancy: heritability and link to genetic liability to schizophrenia. *J Child Psychol Psychiatry.* 2022;63(9):1068-1077. doi:10.1111/jcpp.13564

80. Waddington F, Franke B, Hartman C, Buitelaar JK, Rommelse N, Mota NR. A polygenic risk score analysis of ASD and ADHD across emotion recognition subtypes ADHD, ASD, emotion recognition, polygenic risk score, subtyping. *Am J Med Genet.* 2021;186:401-411. doi:10.1002/ajmg.b.32818
81. Alemany S, Blok E, Jansen PR, Muetzel RL, White T. Brain morphology, autistic traits, and polygenic risk for autism: A population-based neuroimaging study. *Autism Res.* 2021;14(10):2085-2099. doi:10.1002/aur.2576
82. Ecker C, Pretzsch CM, Bletsch A, et al. Interindividual Differences in Cortical Thickness and Their Genomic Underpinnings in Autism Spectrum Disorder. *Am J Psychiatry.* 2022;179(3):242-254. doi:10.1176/appi.ajp.2021.20050630
83. Gui A, Meaburn EL, Tye C, Charman T, Johnson MH, Jones EJH. Association of Polygenic Liability for Autism With Face-Sensitive Cortical Responses From Infancy. *JAMA Pediatr.* 2021;175(9):968. doi:10.1001/jamapediatrics.2021.1338
84. Jansen PR, Muetzel RL, Polderman TJC, et al. Polygenic Scores for Neuropsychiatric Traits and White Matter Microstructure in the Pediatric Population. *Biol Psychiatry Cogn Neurosci Neuroimaging.* 2019;4(3):243-250. doi:10.1016/j.bpsc.2018.07.010
85. Lawrence KE, Hernandez LM, Fuster E, et al. Impact of autism genetic risk on brain connectivity: a mechanism for the female protective effect. *Brain.* 2022;145(1):378-387. doi:10.1093/brain/awab204
86. Mason L, Moessnang C, Chatham C, et al. Stratifying the autistic phenotype using electrophysiological indices of social perception. *Sci Transl Med.* 2022;14(658):eabf8987. doi:10.1126/scitranslmed.abf8987

87. Sha Z, Schijven D, Francks C. Patterns of brain asymmetry associated with polygenic risks for autism and schizophrenia implicate language and executive functions but not brain masculinization. *Mol Psychiatry*. 2021;26(12):7652-7660. doi:10.1038/s41380-021-01204-z
88. Leppert B, Millard LAC, Riglin L, et al. A cross-disorder PRS-pheWAS of 5 major psychiatric disorders in UK Biobank. Zhu X, ed. *PLOS Genet*. 2020;16(5):e1008185. doi:10.1371/journal.pgen.1008185
89. Wendt FR, Carvalho CM, Pathak GA, Gelernter J, Polimanti R. Polygenic risk for autism spectrum disorder associates with anger recognition in a neurodevelopment-focused phenome-wide scan of unaffected youths from a population-based cohort. Williams SM, ed. *PLOS Genet*. 2020;16(9):e1009036. doi:10.1371/journal.pgen.1009036
90. Kalman JL, Loohuis LMO, Vreeker A, et al. Characterisation of age and polarity at onset in bipolar disorder. *Br J Psychiatry*. 2021;219(6):659-669. doi:10.1192/BJP.2021.102
91. Khundrakpam B, Vainik U, Gong J, et al. Neural correlates of polygenic risk score for autism spectrum disorders in general population. *Brain Commun*. 2020;2(2):fcaa092. doi:10.1093/braincomms/fcaa092
92. Maxwell J, Coleman J, Breen G, psychiatry EVJ, 2021 undefined. Association between genetic risk for psychiatric disorders and the probability of living in urban settings. *jamanetwork.com*. Accessed January 4, 2023. [https://jamanetwork.com/journals/jamapsychiatry/article-abstract/2785027?casa\\_token=1R2Ny3LXULsAAAAA:JYE0YLpJAFn5twgh5CPVA4rYANrax0NF3NQk6ji2tGoym1KGCjNVpfSnnfDgyHKNVZkKDa2h2ps](https://jamanetwork.com/journals/jamapsychiatry/article-abstract/2785027?casa_token=1R2Ny3LXULsAAAAA:JYE0YLpJAFn5twgh5CPVA4rYANrax0NF3NQk6ji2tGoym1KGCjNVpfSnnfDgyHKNVZkKDa2h2ps)



93. Peel AJ, Purves KL, Baldwin JR, et al. Genetic and early environmental predictors of adulthood self-reports of trauma. *Br J Psychiatry*. 2022;221(4):613-620.  
doi:10.1192/bjp.2021.207
94. Ratanatharathorn A, Koenen KC, Chibnik LB, Weisskopf MG, Rich-Edwards JW, Roberts AL. Polygenic risk for autism, attention-deficit hyperactivity disorder, schizophrenia, major depressive disorder, and neuroticism is associated with the experience of childhood abuse. *Mol Psychiatry*. 2021;26(5):1696-1705.  
doi:10.1038/s41380-020-00996-w
95. Strom NI, Smit DJA, Silzer T, et al. Meta-analysis of genome-wide association studies of hoarding symptoms in 27,651 individuals. *Transl Psychiatry*. 2022;12(1):1-8.  
doi:10.1038/s41398-022-02248-7
96. Warriar V, Toro R, Won H, et al. Social and non-social autism symptoms and trait domains are genetically dissociable. *Commun Biol*. 2019;2(1):1-13. doi:10.1038/s42003-019-0558-4
97. Warriar V, Baron-Cohen S. Childhood trauma, life-time self-harm, and suicidal behaviour and ideation are associated with polygenic scores for autism. *Mol Psychiatry*. 2021;26(5):1670-1684. doi:10.1038/s41380-019-0550-x
98. Cochran WG. Some Methods for Strengthening the Common  $\chi^2$  Tests. *Biometrics*. 1954;10(4):417-451. doi:10.2307/3001616
99. Akingbuwa WA, Hammerschlag AR, Bartels M, Middeldorp CM. Systematic Review: Molecular Studies of Common Genetic Variation in Child and Adolescent Psychiatric Disorders. *J Am Acad Child Adolesc Psychiatry*. 2022;61(2):227-242.  
doi:10.1016/j.jaac.2021.03.020

100. Lee PH, Anttila V, Won H, et al. Genomic Relationships, Novel Loci, and Pleiotropic Mechanisms across Eight Psychiatric Disorders. *Cell*. 2019;179(7):1469-1482.e11. doi:10.1016/j.cell.2019.11.020
101. Ronald A, Happé F, Plomin R. A twin study investigating the genetic and environmental aetiologies of parent, teacher and child ratings of autistic-like traits and their overlap. *Eur Child Adolesc Psychiatry*. 2008;17(8):473-483. doi:10.1007/S00787-008-0689-5/FIGURES/2
102. Taylor MJ, Robinson EB, Happé F, Bolton P, Freeman D, Ronald A. A longitudinal twin study of the association between childhood autistic traits and psychotic experiences in adolescence. *Mol Autism*. 2015;6(1):44. doi:10.1186/s13229-015-0037-9
103. Agerbo E, Sullivan PF, Vilhjálmsón BJ, et al. Polygenic Risk Score, Parental Socioeconomic Status, Family History of Psychiatric Disorders, and the Risk for Schizophrenia: A Danish Population-Based Study and Meta-analysis. *JAMA Psychiatry*. 2015;72(7):635-641. doi:10.1001/jamapsychiatry.2015.0346
104. Agerbo E, Trabjerg BB, Børglum AD, et al. Risk of Early-Onset Depression Associated With Polygenic Liability, Parental Psychiatric History, and Socioeconomic Status. *JAMA Psychiatry*. 2021;78(4):387-397. doi:10.1001/jamapsychiatry.2020.4172
105. Higgins JPT, Thompson SG. Quantifying heterogeneity in a meta-analysis. *Stat Med*. 2002;21(11):1539-1558. doi:10.1002/sim.1186
106. Pain O, Glanville KP, Hagenaars SP, et al. Evaluation of polygenic prediction methodology within a reference-standardized framework. *PLOS Genet*. 2021;17(5):e1009021. doi:10.1371/journal.pgen.1009021

107. Wand H, Lambert SA, Tamburro C, et al. Improving reporting standards for polygenic scores in risk prediction studies. *Nature*. 2021;591(7849):211-219. doi:10.1038/s41586-021-03243-6
108. Liu BM, Paskov K, Kent J, et al. Racial and Ethnic Disparities in Geographic Access to Autism Resources Across the US. *JAMA Netw Open*. 2023;6(1):e2251182. doi:10.1001/jamanetworkopen.2022.51182
109. Martin AR, Kanai M, Kamatani Y, Okada Y, Neale BM, Daly MJ. Clinical use of current polygenic risk scores may exacerbate health disparities. *Nat Genet*. 2019;51(4):584-591. doi:10.1038/s41588-019-0379-x
110. Arenella M, Cadby G, De Witte W, et al. Potential role for immune-related genes in autism spectrum disorders: Evidence from genome-wide association meta-analysis of autistic traits. *Autism*. 2022;26(2):361-372. doi:10.1177/13623613211019547
111. Happé F, Ronald A. The ‘Fractionable Autism Triad’: A Review of Evidence from Behavioural, Genetic, Cognitive and Neural Research. *Neuropsychol Rev*. 2008;18(4):287-304. doi:10.1007/s11065-008-9076-8
112. Ronald A, Happé F, Bolton P, et al. Genetic heterogeneity between the three components of the autism spectrum: a twin study. *J Am Acad Child Adolesc Psychiatry*. 2006;45(6):691-699. doi:10.1097/01.chi.0000215325.13058.9d
113. Taylor SC, Steeman S, Gehringer BN, et al. Heritability of quantitative autism spectrum traits in adults: A family-based study. *Autism Res*. 2021;14(8):1543-1553. doi:10.1002/aur.2571

114. Antaki D, Guevara J, Maihofer AX, et al. A phenotypic spectrum of autism is attributable to the combined effects of rare variants, polygenic risk and sex. *Nat Genet.* 2022;54(9):1284-1292. doi:10.1038/s41588-022-01064-5
115. Buxbaum JD. Multiple rare variants in the etiology of autism spectrum disorders. *Dialogues Clin Neurosci.* 2009;11(1):35-43. doi:10.31887/DCNS.2009.11.1/jdbuxbaum
116. Jacquemont S, Coe BP, Hersch M, et al. A Higher Mutational Burden in Females Supports a “Female Protective Model” in Neurodevelopmental Disorders. *Am J Hum Genet.* 2014;94(3):415-425. doi:10.1016/j.ajhg.2014.02.001
117. Sanders SJ, He X, Willsey AJ, et al. Insights into Autism Spectrum Disorder Genomic Architecture and Biology from 71 Risk Loci. *Neuron.* 2015;87(6):1215-1233. doi:10.1016/j.neuron.2015.09.016
118. Kreiser NL, White SW. ASD in Females: Are We Overstating the Gender Difference in Diagnosis? *Clin Child Fam Psychol Rev.* 2014;17(1):67-84. doi:10.1007/s10567-013-0148-9
